# Supplementary material for: Membrane-modified electrocatalysts for nitrate reduction to ammonia with high faradaic efficiency
Source: Royal Society of Chemistry journal article supplement (doi:10.1039/d2ta06938e), 2022-01-01
Supplement: d2ta06938e1.pdf [file d2ta06938e1.pdf]

## **Supplementary Information**

### **Membrane-modified Electrocatalysts for Nitrate Reduction to Ammonia with High Faradaic Efficiency**

Profulla Mondol, Dipak Panthi, Adan J. Albarran Ayala,  
Samuel O. Odoh, and Christopher J. Barile\*

Department of Chemistry, University of Nevada, Reno, Reno, NV 89557, USA

\*E-mail: cbarile@unr.edu

| Catalyst                                                | Electrolyte                                                                    | NH <sub>3</sub> Faradaic Efficiency |
|---------------------------------------------------------|--------------------------------------------------------------------------------|-------------------------------------|
| This work<br>(Nafion-modified Cu)                       | 50 mM NaNO <sub>3</sub> and 100 mM Na <sub>2</sub> SO <sub>4</sub>             | 91 ± 2 %                            |
| Fe single atom <sup>1</sup>                             | 500 mM KNO <sub>3</sub> and 100 mM K <sub>2</sub> SO <sub>4</sub>              | 75 %                                |
| PTCDA/O-Cu <sup>2</sup>                                 | 100 mM PBS NO <sub>3</sub> <sup>-</sup> reduction                              | 77 ± 3 %                            |
| Pd-In / c-Al <sub>2</sub> O <sub>3</sub> <sup>3</sup>   | 3.28 mM NaHCO <sub>3</sub> NO <sub>3</sub> <sup>-</sup> reduction              | 71.5 %                              |
| Pt <sup>4</sup>                                         | 3000 mg L <sup>-1</sup> NO <sub>3</sub> <sup>-</sup>                           | 49 %                                |
| 30 % Cu – 70 % Pd <sup>5</sup>                          | 50 mM KNO <sub>3</sub>                                                         | 58 %                                |
| Pd-In / TiO <sub>2n-1</sub>                             | 10 mM NaHCO <sub>3</sub> buffer NO <sub>3</sub> <sup>-</sup> reduction         | 19 ± 1 %                            |
| Pd-Cu / TiO <sub>2n-1</sub>                             |                                                                                | 22 ± 2 %                            |
| Pd-Cu / REM <sup>6</sup>                                |                                                                                | < 2.3 %                             |
| Co-NAs <sup>[7]</sup>                                   | 1 M KOH<br>1700 ppm NO <sub>3</sub> <sup>-</sup>                               | ≥ 96 %                              |
| CuFe <sup>8</sup>                                       | 100 mM K <sub>2</sub> SO <sub>4</sub>                                          | 94.5 %                              |
| Pt <sub>78</sub> Ru <sub>22</sub> /C                    | 100 mM H <sub>2</sub> SO <sub>4</sub><br>1700 ppm NO <sub>3</sub> <sup>-</sup> | ≥ 93.0%                             |
| Bi <sub>2</sub> O <sub>3</sub> -CC <sup>9</sup>         | 500 mM Na <sub>2</sub> SO <sub>4</sub><br>750 ppm NO <sub>3</sub> <sup>-</sup> | 84.9 %                              |
| Co/CoO NSA <sup>10</sup>                                | 100 mM K <sub>2</sub> SO <sub>4</sub><br>200 ppm NO <sub>3</sub> <sup>-</sup>  | 93.8 %                              |
| Co <sub>3</sub> O <sub>4</sub> /NiO HNTs <sup>11]</sup> | 500 mM Na <sub>2</sub> SO <sub>4</sub><br>200 ppm NO <sub>3</sub> <sup>-</sup> | 55 %                                |
| Thiourea/Au <sup>12]</sup>                              | 500 mM NaNO <sub>3</sub>                                                       | 85 %                                |
| Co <sub>3</sub> O <sub>4</sub> /Ti <sup>13</sup>        | 1 M KOH<br>50 ppm NO <sub>3</sub> <sup>-</sup>                                 | 80 %                                |
| Ir NTs <sup>14</sup>                                    | 100 mM HClO <sub>4</sub><br>17000 ppm NO <sub>3</sub> <sup>-</sup>             | 84.7 %                              |

**Table S1.** Previous literature reports of NH<sub>3</sub>-producing NO<sub>3</sub><sup>-</sup> reduction catalysts compared to the Nafion-modified Cu electrode presented in this work.

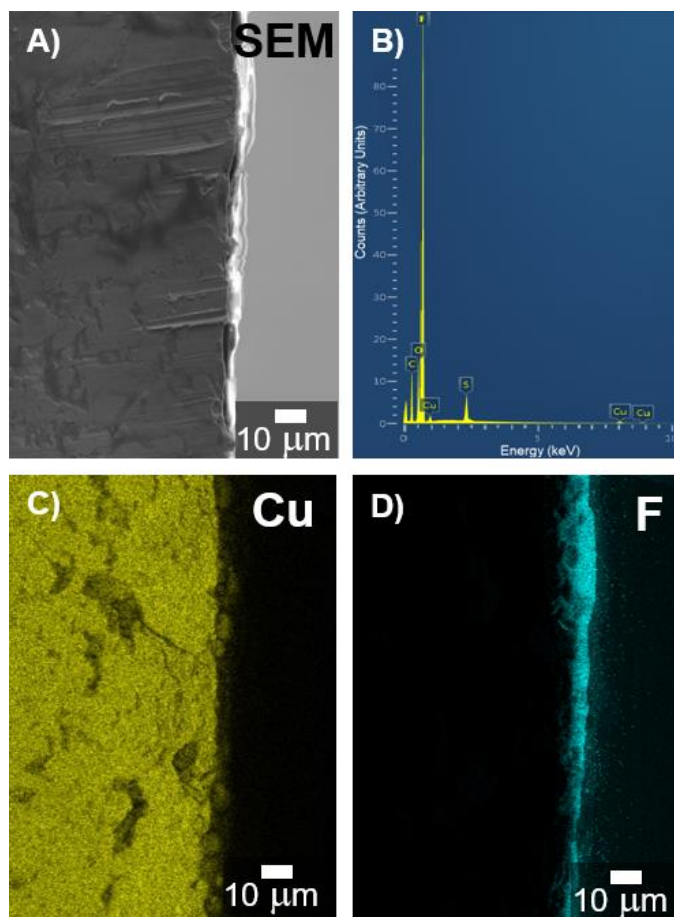

**Figure S1:** Cross-sectional SEM image of a Cu electrode modified with 6 μm of Nafion (A). The EDX spectrum of this substrate indicates that the electrode contains Cu, F, S, C, and O (B). While Cu originates from the Cu electrode, the other four elements are constituents of Nafion. EDX elemental mapping of Cu (C) and F (D) reveals that the Nafion layer is distributed uniformly on the top of the Cu electrode (Figures 1C and 1D).

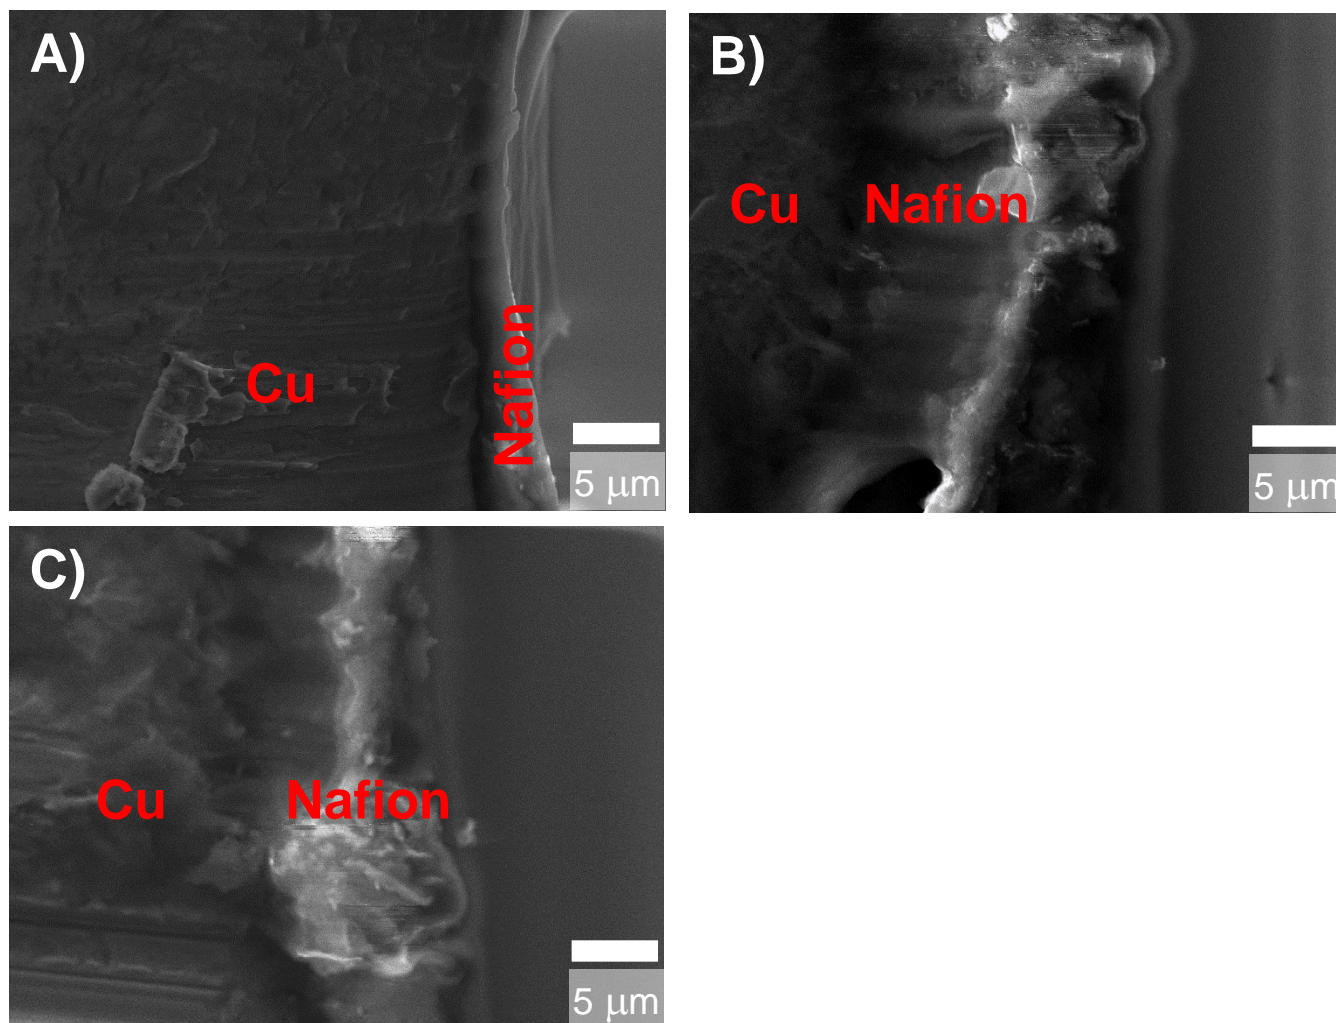

**Figure S2:** Cross-sectional SEM images of Cu electrodes modified with Nafion layers with thicknesses of about 3  $\mu\text{m}$  (A), 8  $\mu\text{m}$  (B) and 10  $\mu\text{m}$  (C).

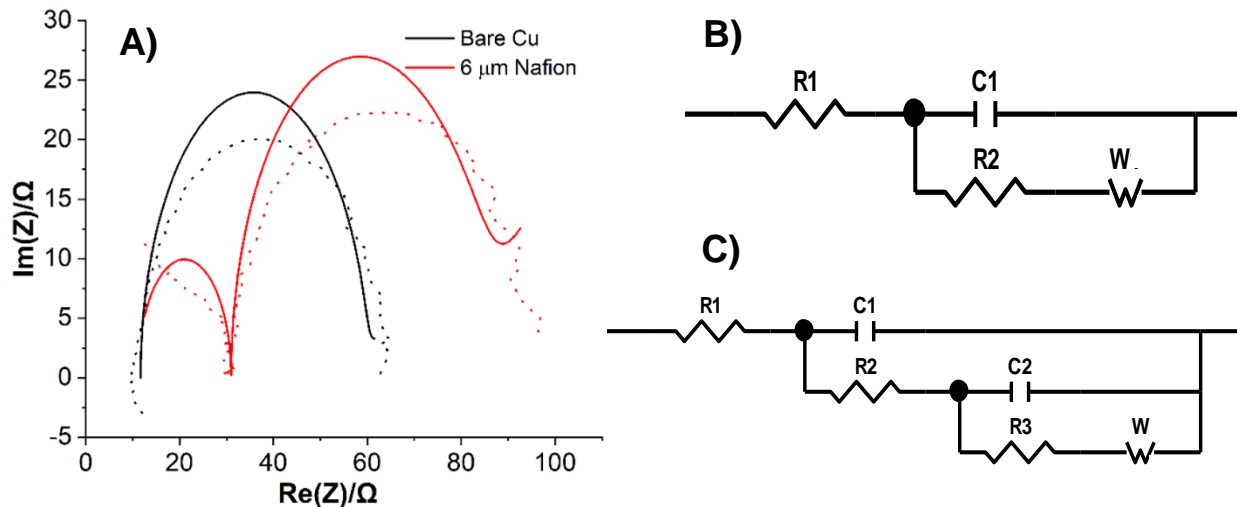

**Figure S3:** EIS spectra of bare Cu (A, black points) and Cu modified with 6  $\mu\text{m}$  of Nafion (A, red points) in 100 mM KCl at open circuit potential. The best fits are displayed as the solid lines. The equivalent circuits used for fitting the data of bare Cu and Nafion-modified Cu are shown in panels B and C, respectively.

While a standard Randles circuit is used to model the EIS data of the unmodified Cu electrode (Figure S3B), a Randles circuit with one more resistor and capacitor is used to model the EIS data of the Nafion-modified Cu electrode to account for the Nafion layer.  $R_1$  is the solution resistance in both circuit diagrams, and it has similar values in both experiments (12  $\Omega$  and 11  $\Omega$  for bare Cu and Nafion-modified Cu, respectively). This similarity is expected because the presence of Nafion does not significantly alter the resistance of the bulk electrolyte.  $R_2 = 48 \Omega$  and  $R_3 = 52 \Omega$  are the charge transfer resistances of the bare Cu and Nafion-modified Cu electrodes, respectively, which are also similar. The added resistance due to the Nafion is reflected in the  $R_2 = 20 \Omega$  component of the equivalent circuit for the Nafion-modified Cu electrode.  $C_1 = 95 \mu\text{F}$  and  $C_2 = 230 \mu\text{F}$  are the double layer capacitances of the bare Cu and Nafion-modified Cu electrodes, respectively. The Nafion-modified Cu electrode possesses a higher double layer capacitance due to the charged nature of the Nafion layer, which increases the quantity of ions that are stored in the double layer above the Nafion. The  $C_1 = 6 \text{ nF}$  for the Nafion-modified Cu electrode indicates that some charge is also stored inside the Nafion layer.

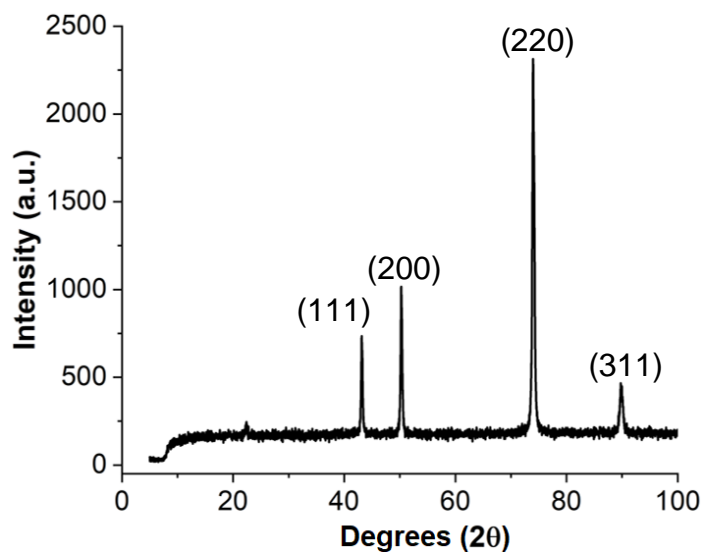

**Figure S4:** XRD spectrum of an unmodified Cu electrode.

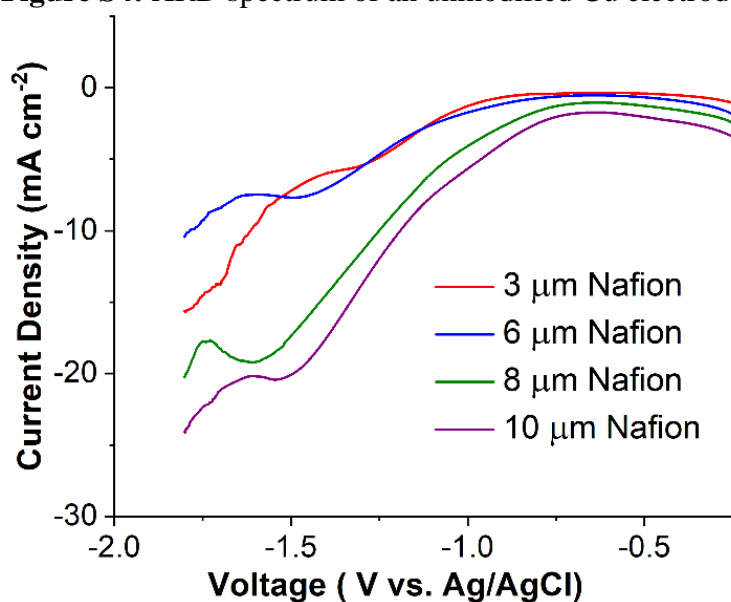

**Figure S5:** Linear sweep voltammograms at a scan rate of  $10 \text{ mV s}^{-1}$  in  $50 \text{ mM NaNO}_3$  and  $100 \text{ mM Na}_2\text{SO}_4$  of Cu modified with  $3 \text{ }\mu\text{m}$  (red line),  $6 \text{ }\mu\text{m}$  (blue line),  $8 \text{ }\mu\text{m}$  (green line), and  $10 \text{ }\mu\text{m}$  (purple line) of Nafion. The onset potentials of these LSVs curves (defined as the potential at which 10% of the maximum current is attained) are  $-1.04 \text{ V}$ ,  $-0.88 \text{ V}$ ,  $-0.83 \text{ V}$ , and  $-0.75 \text{ V}$  for the  $3 \text{ }\mu\text{m}$ ,  $6 \text{ }\mu\text{m}$ ,  $8 \text{ }\mu\text{m}$ , and  $10 \text{ }\mu\text{m}$  Nafion layers, respectively.

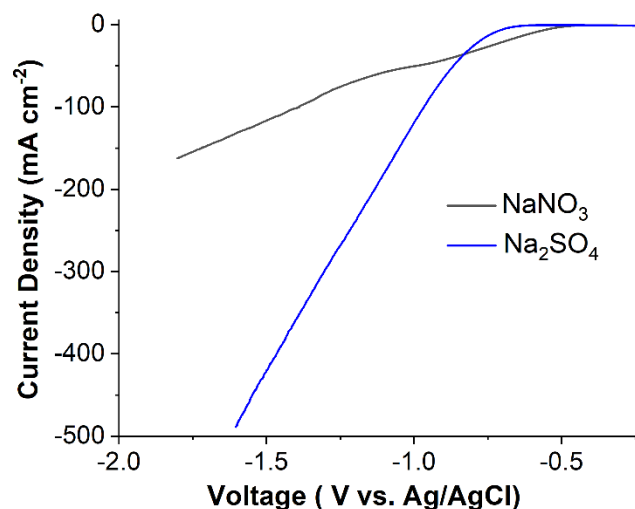

**Figure S6:** Linear sweep voltammograms at a scan rate of  $10 \text{ mV s}^{-1}$  of unmodified Cu electrodes at pH 1.0 with 50 mM  $\text{NaNO}_3$  and 100 mM  $\text{Na}_2\text{SO}_4$  (black line) and 100 mM  $\text{Na}_2\text{SO}_4$  (blue line).

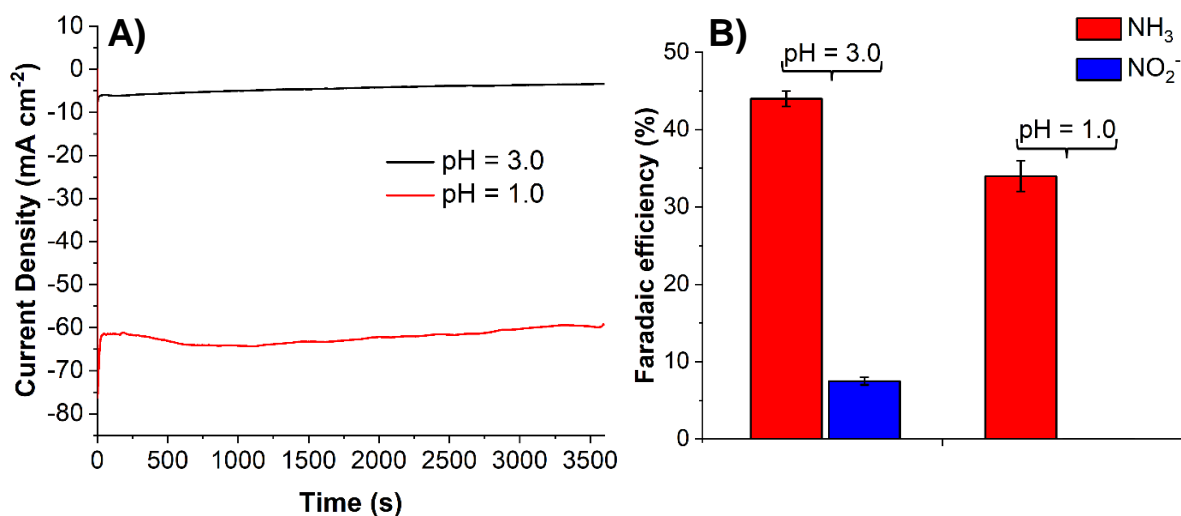

**Figure S7:** Chronoamperometry of unmodified Cu electrodes in 50 mM  $\text{NaNO}_3$  and 100 mM  $\text{Na}_2\text{SO}_4$  at pH 3.0 (A, black line) and pH 1.0 (A, red line) and Faradaic efficiencies of  $\text{NH}_3$  (red bars) and  $\text{NO}_2^-$  (blue bars) production after chronoamperometry (B). In both cases, because no nitrogen-containing products other than  $\text{NH}_3$  and  $\text{NO}_2^-$  were detected, the Faradaic efficiencies for the  $\text{H}_2$  evolution reaction are high.

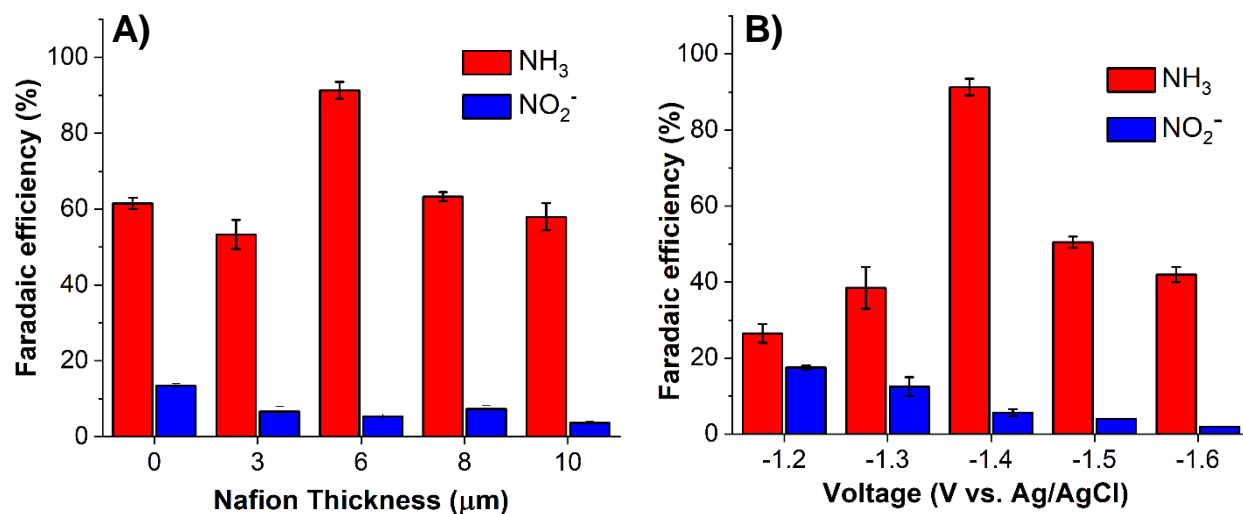

**Figure S8:** Faradaic efficiencies of  $\text{NH}_3$  (red bars) and  $\text{NO}_2^-$  (blue bars) production after 1 hour of chronoamperometry at  $-1.4$  V vs. Ag/AgCl from Cu electrodes modified with different thickness Nafion (A) and after 1 hour of chronoamperometry at different voltages with  $6 \mu\text{m}$  Nafion (B).



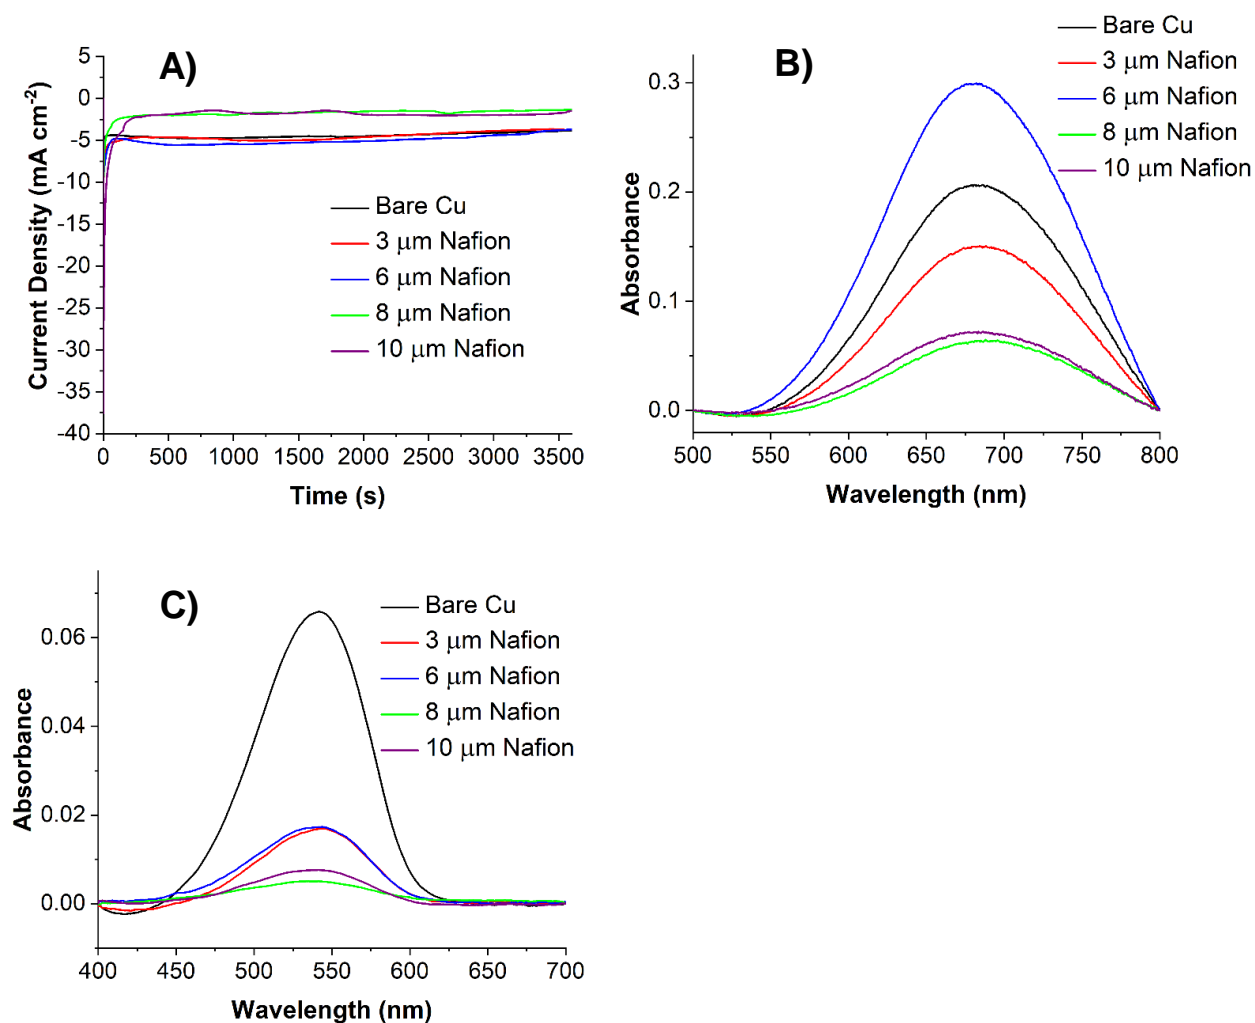

**Figure S9:** Chronoamperometry curves of unmodified (bare) Cu (black line) and Cu modified with 3 μm (red line), 6 μm (blue line), 8 μm (green line), and 10 μm (purple line) of Nafion at -1.4 V in 50 mM NaNO<sub>3</sub> and 100 mM Na<sub>2</sub>SO<sub>4</sub> (A), and UV-Vis absorption spectra after chronoamperometry for NH<sub>3</sub> (B) and NO<sub>2</sub><sup>-</sup> (C) detection.

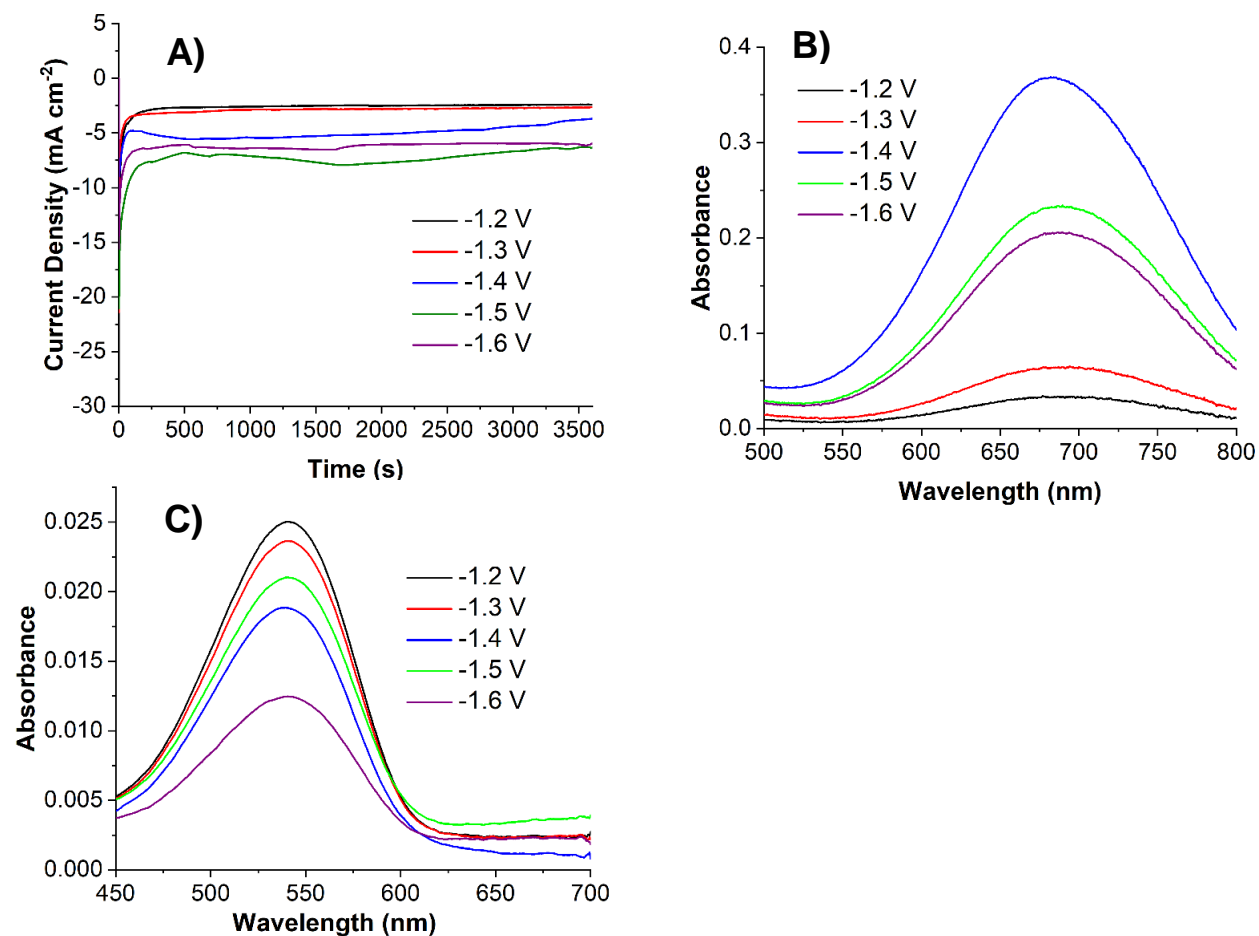

**Figure S10:** Chronoamperometry curves of Cu modified with 6 μm of Nafion at -1.2 V (black line), -1.3 V (red line), -1.4 V (blue line), -1.5 V (green line), and -1.6 V (purple line) in 50 mM NaNO<sub>3</sub> and 100 mM Na<sub>2</sub>SO<sub>4</sub> (A), and UV-Vis absorption spectra after chronoamperometry for NH<sub>3</sub> (B) and NO<sub>2</sub><sup>-</sup> (C) detection.

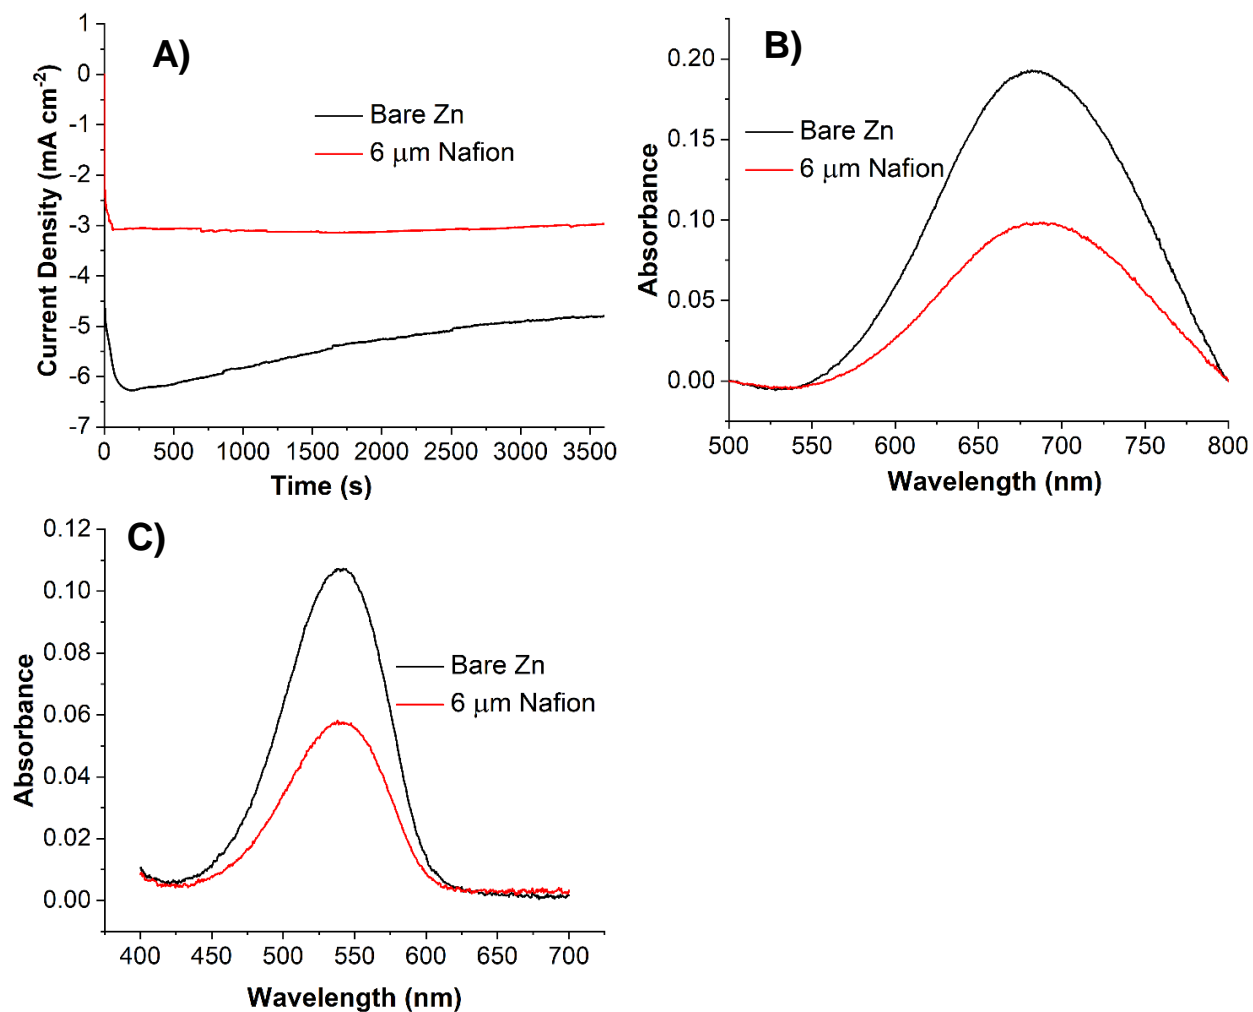

**Figure S11:** Chronoamperometry curves of unmodified (bare) Zn (black line) and Zn modified with 6  $\mu\text{m}$  of Nafion (red line) at -1.5 V in 50 mM  $\text{NaNO}_3$  and 100 mM  $\text{Na}_2\text{SO}_4$  (A), and UV-Vis absorption spectra after chronoamperometry for  $\text{NH}_3$  (B) and  $\text{NO}_2^-$  (C) detection.

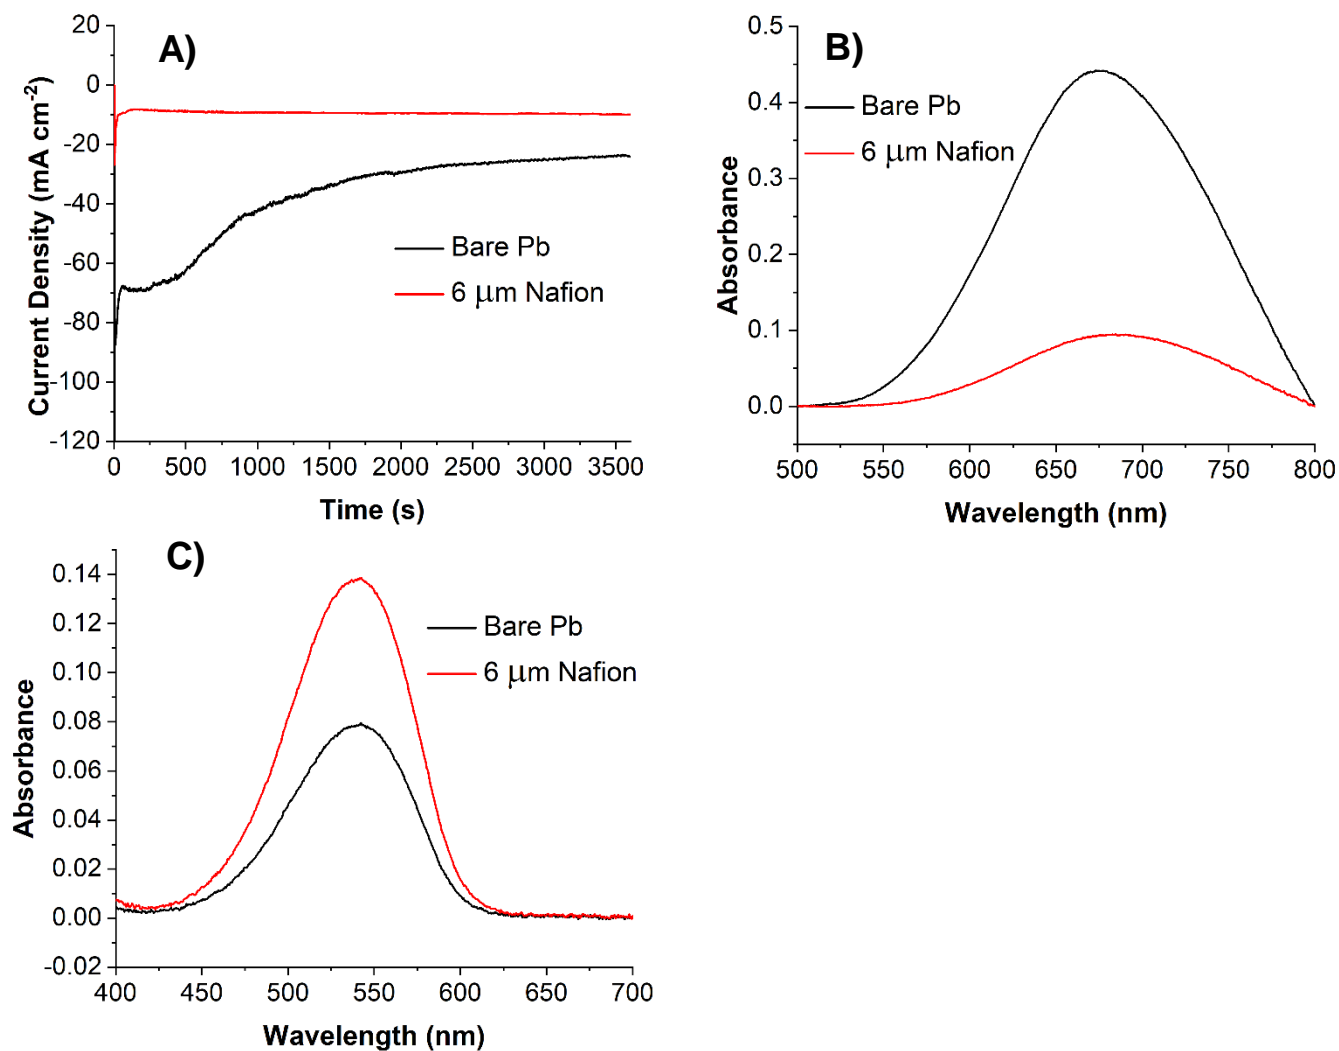

**Figure S12:** Chronoamperometry curves of unmodified (bare) Pb (black line) and Pb modified with 6 μm of Nafion (red line) at -2.0 V in 50 mM NaNO<sub>3</sub> and 100 mM Na<sub>2</sub>SO<sub>4</sub> (A), and UV-Vis absorption spectra after chronoamperometry for NH<sub>3</sub> (B) and NO<sub>2</sub><sup>-</sup> (C) detection.

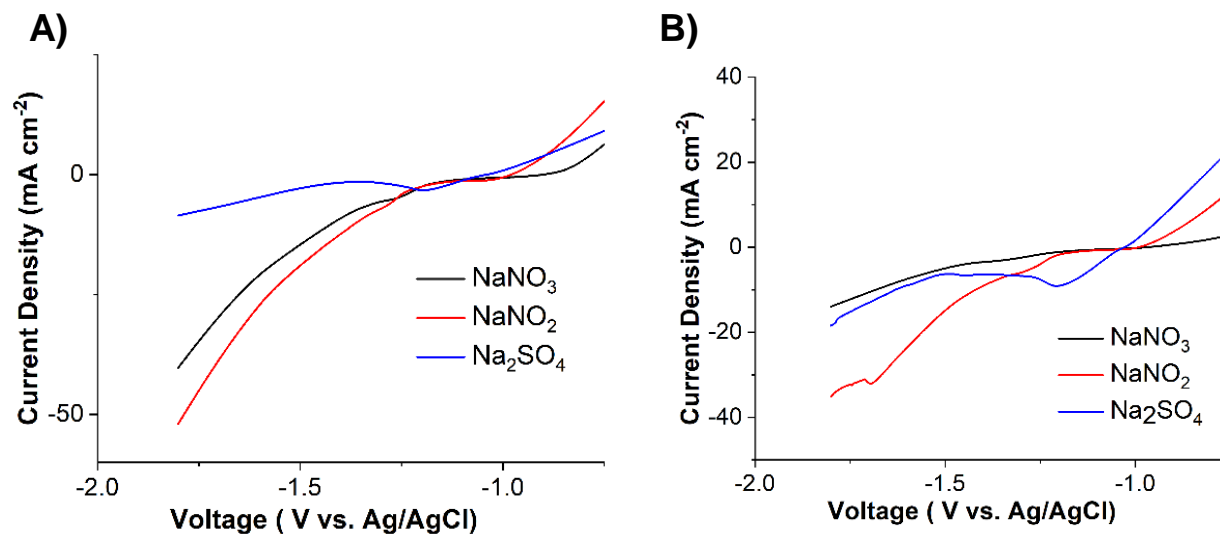

**Figure S13:** Linear sweep voltammograms at a scan rate of  $10 \text{ mV s}^{-1}$  of unmodified Zn (A) and Zn modified with  $6 \mu\text{m}$  of Nafion (B) in  $50 \text{ mM NaNO}_3$  and  $100 \text{ mM Na}_2\text{SO}_4$  (black line),  $50 \text{ mM NaNO}_2$  and  $100 \text{ mM Na}_2\text{SO}_4$  (red line), and  $100 \text{ mM Na}_2\text{SO}_4$  (blue line). In the presence of  $50 \text{ mM NaNO}_3$  and  $100 \text{ mM Na}_2\text{SO}_4$ , the onset potentials of the LSVs curves (defined as the potential at which 10% of the maximum current is attained) are  $-1.24 \text{ V}$  and  $-1.23 \text{ V}$  for the unmodified and Nafion-modified Zn electrodes, respectively.

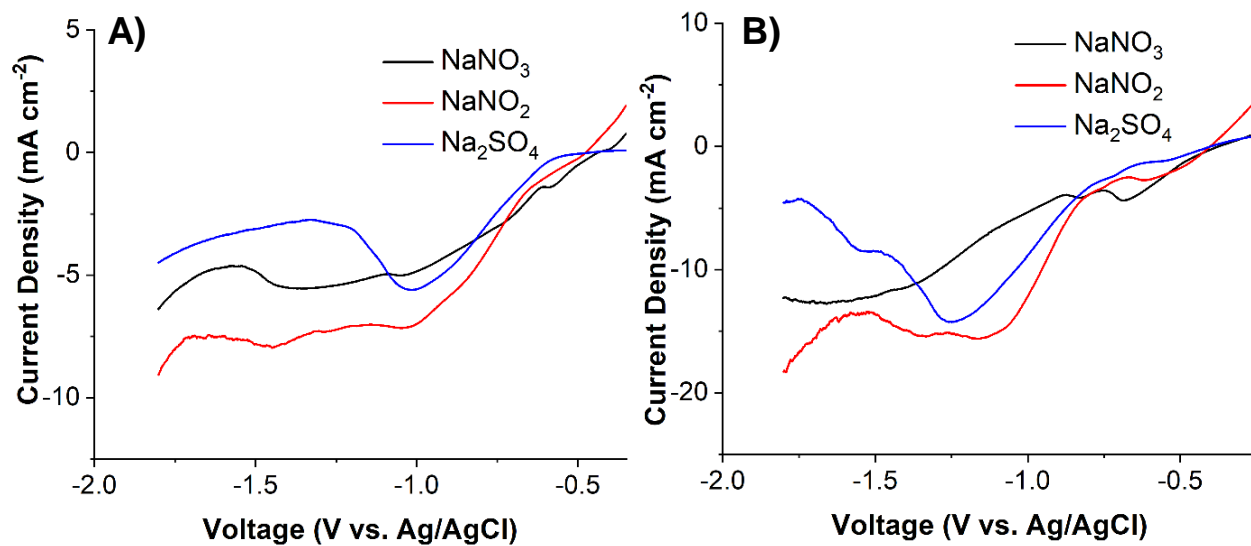

**Figure S14:** Linear sweep voltammograms at a scan rate of  $10 \text{ mV s}^{-1}$  of unmodified Pb (A) and Pb modified with  $6 \mu\text{m}$  of Nafion (B) in 50 mM NaNO<sub>3</sub> and 100 mM Na<sub>2</sub>SO<sub>4</sub> (black line), 50 mM NaNO<sub>2</sub> and 100 mM Na<sub>2</sub>SO<sub>4</sub> (red line), and 100 mM Na<sub>2</sub>SO<sub>4</sub> (blue line). In the presence of 50 mM NaNO<sub>3</sub> and 100 mM Na<sub>2</sub>SO<sub>4</sub>, the onset potentials of the LSVs curves (defined as the potential at which 10% of the maximum current is attained) are -0.5 V and -0.49 V for the unmodified and Nafion-modified Pb electrodes, respectively.

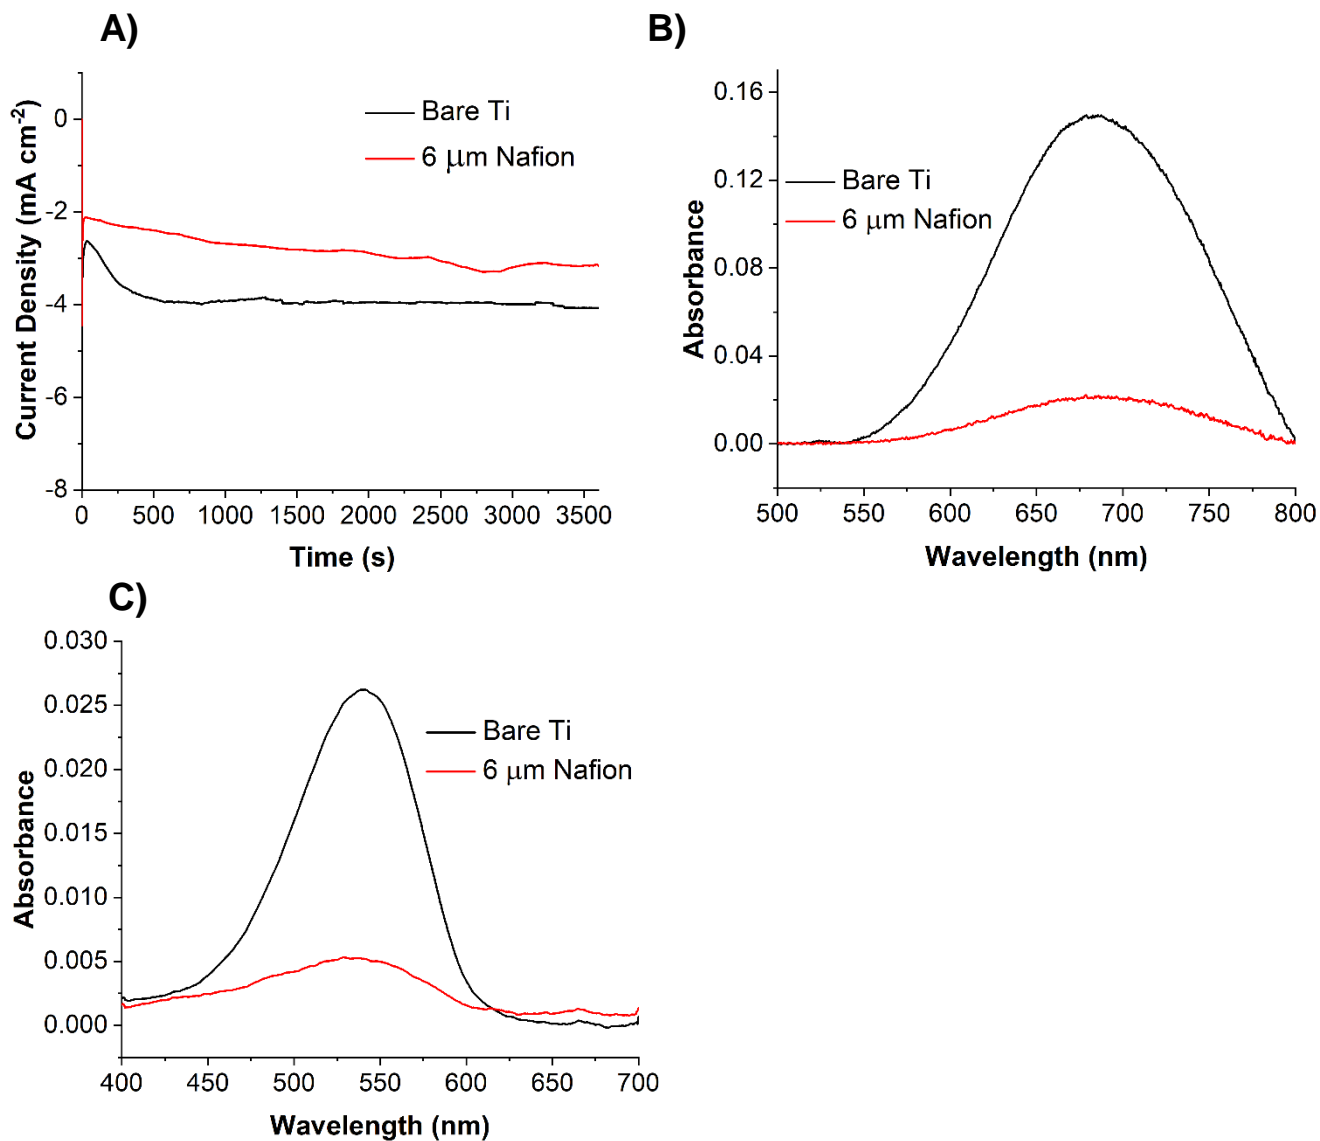

**Figure S15:** Chronoamperometry curves of unmodified (bare) Ti (black line) and Ti modified with 6  $\mu\text{m}$  of Nafion (red line) at  $-1.6 \text{ V}$  in  $50 \text{ mM NaNO}_3$  and  $100 \text{ mM Na}_2\text{SO}_4$  (A), and UV-Vis absorption spectra after chronoamperometry for  $\text{NH}_3$  (B) and  $\text{NO}_2^-$  (C) detection.

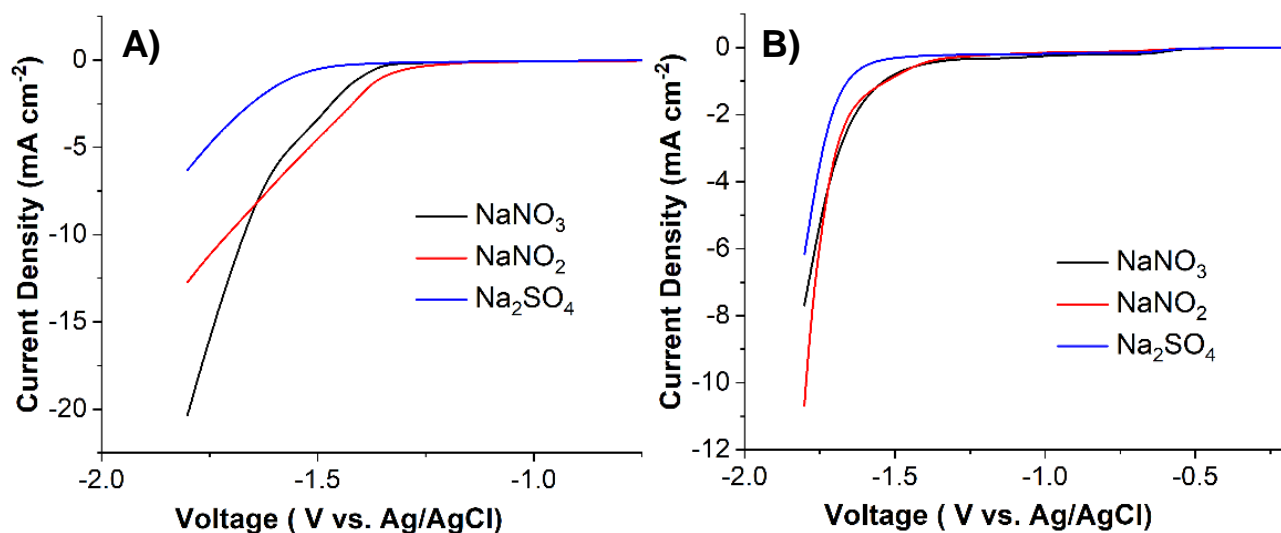

**Figure S16:** Linear sweep voltammograms at a scan rate of  $10 \text{ mV s}^{-1}$  of unmodified Ti (A) and Ti modified with  $6 \mu\text{m}$  of Nafion (B) in  $50 \text{ mM NaNO}_3$  and  $100 \text{ mM Na}_2\text{SO}_4$  (black line),  $50 \text{ mM NaNO}_2$  and  $100 \text{ mM Na}_2\text{SO}_4$  (red line), and  $100 \text{ mM Na}_2\text{SO}_4$  (blue line). In the presence of  $50 \text{ mM NaNO}_3$  and  $100 \text{ mM Na}_2\text{SO}_4$ , the onset potentials of the LSVs curves (defined as the potential at which 10% of the maximum current is attained) are  $-1.45 \text{ V}$  and  $-1.48 \text{ V}$  for the unmodified and Nafion-modified Ti electrodes, respectively.

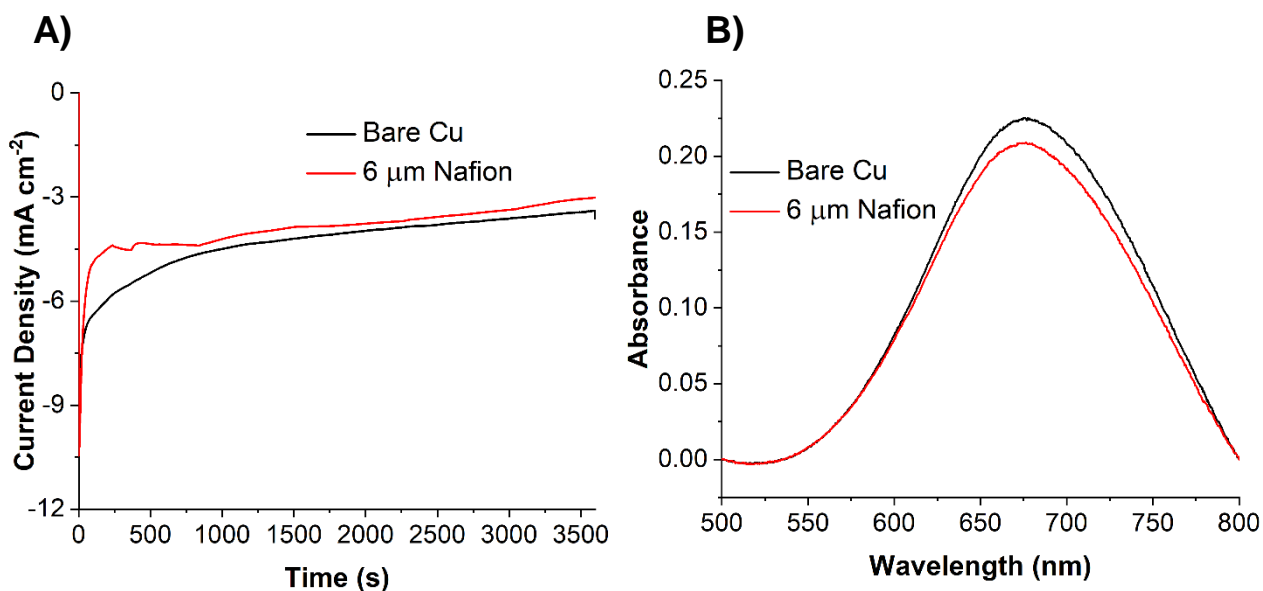

**Figure S17:** Chronoamperometry curves of unmodified (bare) Cu (black line) and Cu modified with  $6 \mu\text{m}$  of Nafion (red line) at  $-1.4 \text{ V}$  in  $50 \text{ mM NaNO}_2$  and  $100 \text{ mM Na}_2\text{SO}_4$  (A), and UV-Vis absorption spectra after chronoamperometry for  $\text{NH}_3$  (B) detection.



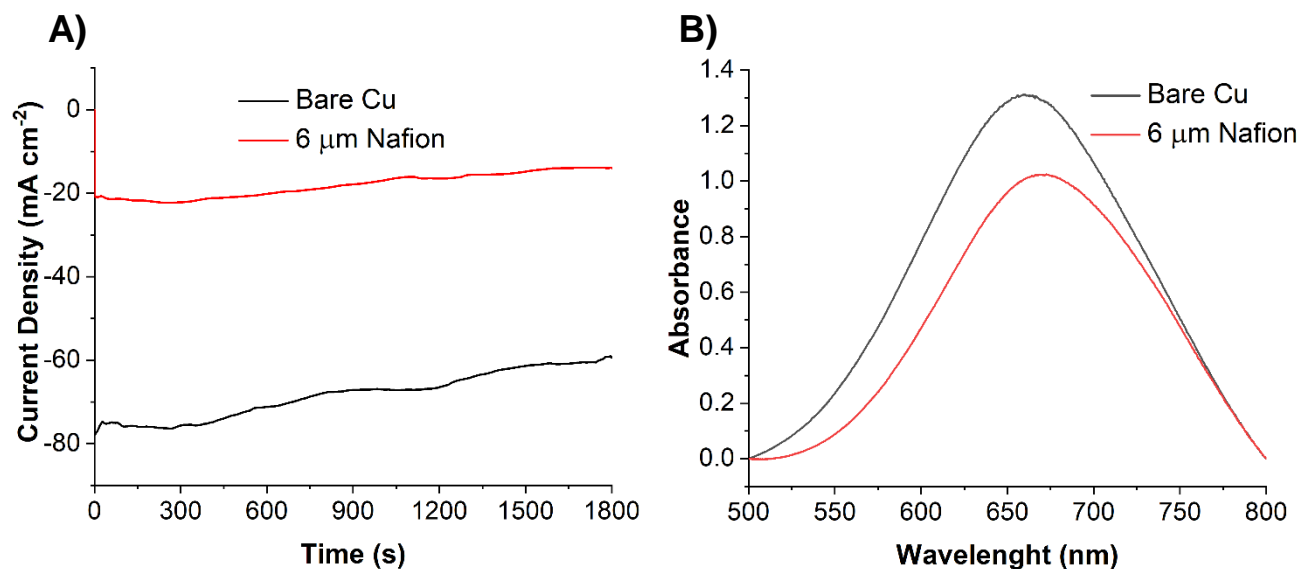

**Figure S18:** Chronoamperometry curves of unmodified (bare) Cu (black line) and Cu modified with 6 μm of Nafion (red line) at -1.4 V in 2 mM NO and 100 mM Na<sub>2</sub>SO<sub>4</sub> (A), and UV-Vis absorption spectra after chronoamperometry for NH<sub>3</sub> (B) detection.

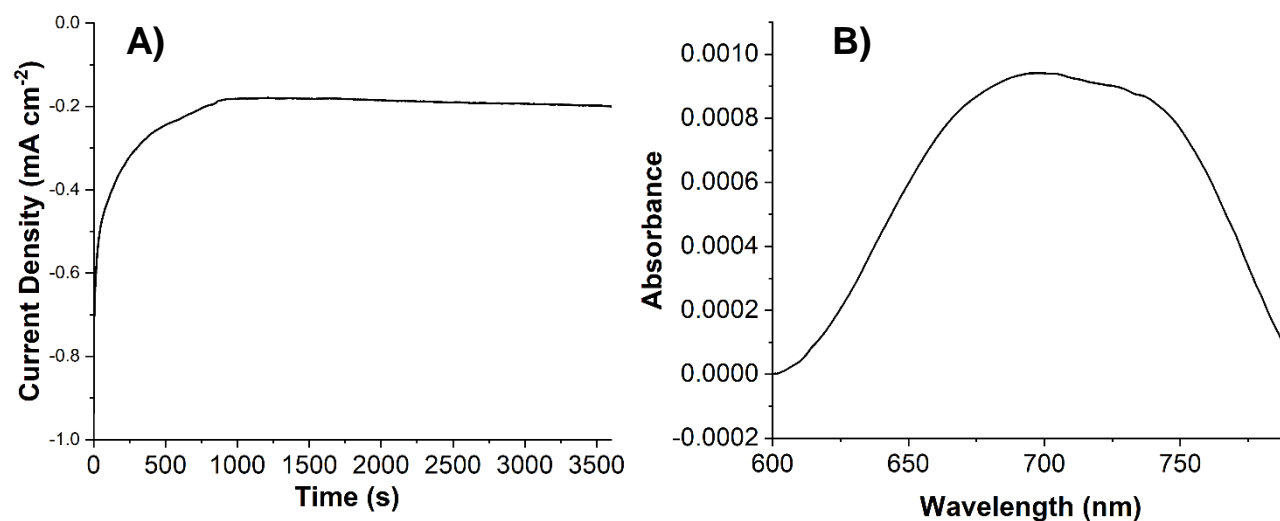

**Figure S19:** Chronoamperometry curve of Cu modified with 6 μm of Nafion at -1.4 V in groundwater obtained from a well in Silver Springs, Nevada, United States, and UV-Vis absorption spectrum after chronoamperometry for NH<sub>3</sub> detection (B).

**Pseudopotentials and plane wave basis sets:**

Cu 63.54600 Cu.pbe-dn-kjpaw\_psl.1.0.0.UPF  
Zn 65.38000 Zn.pbe-dn-kjpaw\_psl.1.0.0.UPF  
O 15.99940 O.pbe-n-kjpaw\_psl.1.0.0.UPF  
H 1.00794 H.pbe-kjpaw\_psl.1.0.0.UPF  
N 14.00670 N.pbe-n-kjpaw\_psl.1.0.0.UPF  
C 12.01070 C.pbe-n-kjpaw\_psl.1.0.0.UPF  
F 18.99840 F.pbe-n-kjpaw\_psl.1.0.0.UPF  
S 32.06500 S.pbe-nl-kjpaw\_psl.1.0.0.UPF

**FIRST PROTONATION ON CU111 Surfaces**

*NO-Cu111*

CELL\_PARAMETERS (angstrom)

15.346059799 0.000000000 0.000000000  
-7.673035145 13.290086719 0.000000000  
0.000000000 0.000000000 50.000000000

ATOMIC\_POSITIONS (angstrom)

Cu -0.000007673 1.476680320 22.978979452 0 0 0  
Cu -1.278850839 3.691702335 22.978979452 0 0 0  
Cu -2.557695540 5.906724349 22.978979452 0 0 0  
Cu -3.836538707 8.121746364 22.978979452 0 0 0  
Cu -5.115383407 10.336769913 22.978979452 0 0 0  
Cu -6.394226574 12.551793462 22.978979452 0 0 0  
Cu 2.557677125 1.476680320 22.978979452 0 0 0  
Cu 1.278832424 3.691702335 22.978979452 0 0 0  
Cu -0.000009208 5.906724349 22.978979452 0 0 0  
Cu -1.278852374 8.121746364 22.978979452 0 0 0  
Cu -2.557697075 10.336769913 22.978979452 0 0 0  
Cu -3.836540241 12.551793462 22.978979452 0 0 0  
Cu 5.115363457 1.476680320 22.978979452 0 0 0  
Cu 3.836518757 3.691702335 22.978979452 0 0 0  
Cu 2.557675590 5.906724349 22.978979452 0 0 0  
Cu 1.278830889 8.121746364 22.978979452 0 0 0  
Cu -0.000012277 10.336769913 22.978979452 0 0 0  
Cu -1.278855443 12.551793462 22.978979452 0 0 0  
Cu 7.673048255 1.476680320 22.978979452 0 0 0  
Cu 6.394205089 3.691702335 22.978979452 0 0 0  
Cu 5.115361923 5.906724349 22.978979452 0 0 0  
Cu 3.836517222 8.121746364 22.978979452 0 0 0  
Cu 2.557674056 10.336769913 22.978979452 0 0 0  
Cu 1.278829355 12.551793462 22.978979452 0 0 0  
Cu 10.230734588 1.476680320 22.978979452 0 0 0  
Cu 8.951889887 3.691702335 22.978979452 0 0 0  
Cu 7.673048255 5.906724349 22.978979452 0 0 0  
Cu 6.394203555 8.121746364 22.978979452 0 0 0  
Cu 5.115360388 10.336769913 22.978979452 0 0 0  
Cu 3.836515687 12.551793462 22.978979452 0 0 0  
Cu 12.788420921 1.476680320 22.978979452 0 0 0  
Cu 11.509576220 3.691702335 22.978979452 0 0 0  
Cu 10.230733053 5.906724349 22.978979452 0 0 0  
Cu 8.951889887 8.121746364 22.978979452 0 0 0  
Cu 7.673046721 10.336769913 22.978979452 0 0 0  
Cu 6.394202020 12.551793462 22.978979452 0 0 0  
N 2.610685588 2.95527412 28.352753037  
O 2.776577247 3.008443101 29.600230645  
H 4.357664370 3.849470777 29.711902580  
Cu 1.283755456 0.756450154 25.054435265  
Cu 0.018880363 2.949105251 25.056727232  
Cu -1.273487534 5.171460008 25.016213796  
Cu -2.557036415 7.386287117 25.018577671  
Cu -3.837166015 9.596008875 25.025111191  
Cu -5.113436350 11.815917735 25.020905876

Cu 3.840044853 0.747817786 25.037043622  
Cu 2.559842554 2.954986295 25.021597844  
Cu 1.291025980 5.164912107 25.041277365  
Cu -0.004612933 7.388666113 25.022323540  
Cu -1.283032365 9.596692095 25.025974411  
Cu -2.557050940 11.806235175 25.024205712  
Cu 6.401772042 0.734424931 25.021939624  
Cu 5.112935265 2.967023960 25.062318805  
Cu 3.844442941 5.172722638 25.098479189  
Cu 2.569228621 7.386353891 25.045596764  
Cu 1.270672009 9.601071580 25.022695603  
Cu -0.000949088 11.810992876 25.028371161  
Cu 8.957538883 0.740691529 25.027751166  
Cu 7.683277452 2.953652745 25.014491367  
Cu 6.382523871 5.163853148 25.039698792  
Cu 5.109129313 7.382017643 25.035813779  
Cu 3.831626468 9.608625573 25.016564362  
Cu 2.557397426 11.816234955 25.027072164  
Cu 11.509609181 0.742895739 25.031072840  
Cu 10.235379485 2.954774293 25.020010494  
Cu 8.961372895 5.176987648 25.006086650  
Cu 7.677456975 7.387172763 24.999081303  
Cu 6.397869710 9.607678517 25.000905550  
Cu 5.115630064 11.816828178 25.027998596  
Cu 14.066243586 0.739072013 25.028527050  
Cu 12.790538199 2.954544439 25.021306133  
Cu 11.509344166 5.172535308 25.010822528  
Cu 10.232378687 7.389685131 25.012252748  
Cu 8.959764448 9.604052171 25.008701179  
Cu 7.675608552 11.815090115 25.025804396  
Cu -0.016400654 -0.013299758 27.070063923  
Cu -1.300525580 2.211829417 27.072171860  
Cu -2.563336457 4.438541983 27.046790846  
Cu -3.842333481 6.654561484 27.052259030  
Cu -5.123751756 8.856844331 27.073264252  
Cu -6.393851519 11.064740457 27.069824069  
Cu 2.561440790 -0.042279824 27.062470093  
Cu 1.217049988 2.175804550 27.197174840  
Cu -0.038200903 4.454661208 27.066970472  
Cu -1.295975174 6.651313565 27.076017948  
Cu -2.565567506 8.857148522 27.074517572  
Cu -3.836511037 11.064148555 27.070664610  
Cu 5.142532941 -0.018712024 27.060958641  
Cu 3.903934489 2.164359479 27.105674390  
Cu 2.531244279 4.493069140 27.120232565  
Cu 1.262113358 6.672957879 27.058305913  
Cu -0.007130549 8.864968598 27.073764585  
Cu -1.277982921 11.066716378 27.073547719  
Cu 7.691514001 -0.006595511 27.074374285  
Cu 6.446511052 2.195635507 27.055286487  
Cu 5.179959721 4.442233505 27.163849101  
Cu 3.844214928 6.704601348 27.140201045  
Cu 2.547856073 8.899065781 27.060673838  
Cu 1.278620194 11.081169613 27.078571225  
Cu 10.236084223 0.005335720 27.077434285  
Cu 8.969993387 2.224712190 27.078488976  
Cu 7.714160160 4.441831878 27.026826845  
Cu 6.435926940 6.672518213 27.039679142  
Cu 5.130962645 8.895614082 27.021204723  
Cu 3.840381155 11.082932223 27.084245589  
Cu 12.780931627 -0.000119774 27.077881360  
Cu 11.508563929 2.228134986 27.078376828  
Cu 10.237539040 4.437220220 27.060171917  
Cu 8.961968047 6.656276583 27.054618444  
Cu 7.675102983 8.874082824 27.024018241  
Cu 6.395065014 11.077118519 27.073685965

|   |              |             |              |
|---|--------------|-------------|--------------|
| O | 3.979517103  | 6.894243973 | 29.494276832 |
| H | 3.060353034  | 7.042678003 | 29.777977732 |
| H | 4.710914626  | 5.385579142 | 29.600230492 |
| H | 4.522678373  | 7.714491231 | 29.750959041 |
| O | 5.489270273  | 8.959485872 | 30.153955416 |
| H | 5.418572173  | 9.644362400 | 29.451390986 |
| H | 6.438470469  | 8.697086119 | 30.143354376 |
| O | 11.548478120 | 5.018187779 | 30.089565707 |
| O | 9.169051661  | 5.742294527 | 30.801419259 |
| O | 8.354574340  | 8.184882240 | 30.107132707 |
| O | 7.627997689  | 3.923871972 | 30.164277461 |
| H | 10.116906876 | 5.498979611 | 30.469276778 |
| H | 11.953924775 | 5.609121098 | 29.411578184 |
| H | 8.899473896  | 6.667527193 | 30.498189560 |
| H | 8.451394104  | 4.974164729 | 30.478405979 |
| H | 8.893651743  | 8.922560511 | 30.451741827 |
| H | 8.476083399  | 8.237908966 | 29.114023174 |
| H | 11.516477917 | 4.161008413 | 29.609462709 |
| O | 5.097945670  | 4.470917927 | 29.473123328 |
| H | 7.939077422  | 3.483172731 | 29.336721967 |
| H | 6.666814554  | 4.155203909 | 29.976130476 |

End final coordinates

*NOH-Cu11*

CELL\_PARAMETERS (angstrom)

|              |              |              |
|--------------|--------------|--------------|
| 15.346059799 | 0.000000000  | 0.000000000  |
| -7.673035145 | 13.290086719 | 0.000000000  |
| 0.000000000  | 0.000000000  | 50.000000000 |

ATOMIC\_POSITIONS (angstrom)

|    |              |              |              |   |   |   |
|----|--------------|--------------|--------------|---|---|---|
| Cu | -0.000007673 | 1.476680320  | 22.978979452 | 0 | 0 | 0 |
| Cu | -1.278850839 | 3.691702335  | 22.978979452 | 0 | 0 | 0 |
| Cu | -2.557695540 | 5.906724349  | 22.978979452 | 0 | 0 | 0 |
| Cu | -3.836538707 | 8.121746364  | 22.978979452 | 0 | 0 | 0 |
| Cu | -5.115383407 | 10.336769913 | 22.978979452 | 0 | 0 | 0 |
| Cu | -6.394226574 | 12.551793462 | 22.978979452 | 0 | 0 | 0 |
| Cu | 2.557677125  | 1.476680320  | 22.978979452 | 0 | 0 | 0 |
| Cu | 1.278832424  | 3.691702335  | 22.978979452 | 0 | 0 | 0 |
| Cu | -0.000009208 | 5.906724349  | 22.978979452 | 0 | 0 | 0 |
| Cu | -1.278852374 | 8.121746364  | 22.978979452 | 0 | 0 | 0 |
| Cu | -2.557697075 | 10.336769913 | 22.978979452 | 0 | 0 | 0 |
| Cu | -3.836540241 | 12.551793462 | 22.978979452 | 0 | 0 | 0 |
| Cu | 5.115363457  | 1.476680320  | 22.978979452 | 0 | 0 | 0 |
| Cu | 3.836518757  | 3.691702335  | 22.978979452 | 0 | 0 | 0 |
| Cu | 2.557675590  | 5.906724349  | 22.978979452 | 0 | 0 | 0 |
| Cu | 1.278830889  | 8.121746364  | 22.978979452 | 0 | 0 | 0 |
| Cu | -0.000012277 | 10.336769913 | 22.978979452 | 0 | 0 | 0 |
| Cu | -1.278855443 | 12.551793462 | 22.978979452 | 0 | 0 | 0 |
| Cu | 7.673048255  | 1.476680320  | 22.978979452 | 0 | 0 | 0 |
| Cu | 6.394205089  | 3.691702335  | 22.978979452 | 0 | 0 | 0 |
| Cu | 5.115361923  | 5.906724349  | 22.978979452 | 0 | 0 | 0 |
| Cu | 3.836517222  | 8.121746364  | 22.978979452 | 0 | 0 | 0 |
| Cu | 2.557674056  | 10.336769913 | 22.978979452 | 0 | 0 | 0 |
| Cu | 1.278829355  | 12.551793462 | 22.978979452 | 0 | 0 | 0 |
| Cu | 10.230734588 | 1.476680320  | 22.978979452 | 0 | 0 | 0 |
| Cu | 8.951889887  | 3.691702335  | 22.978979452 | 0 | 0 | 0 |
| Cu | 7.673048255  | 5.906724349  | 22.978979452 | 0 | 0 | 0 |
| Cu | 6.394203555  | 8.121746364  | 22.978979452 | 0 | 0 | 0 |
| Cu | 5.115360388  | 10.336769913 | 22.978979452 | 0 | 0 | 0 |
| Cu | 3.836515687  | 12.551793462 | 22.978979452 | 0 | 0 | 0 |
| Cu | 12.788420921 | 1.476680320  | 22.978979452 | 0 | 0 | 0 |
| Cu | 11.509576220 | 3.691702335  | 22.978979452 | 0 | 0 | 0 |
| Cu | 10.230733053 | 5.906724349  | 22.978979452 | 0 | 0 | 0 |
| Cu | 8.951889887  | 8.121746364  | 22.978979452 | 0 | 0 | 0 |
| Cu | 7.673046721  | 10.336769913 | 22.978979452 | 0 | 0 | 0 |
| Cu | 6.394202020  | 12.551793462 | 22.978979452 | 0 | 0 | 0 |

|    |              |              |              |
|----|--------------|--------------|--------------|
| N  | 2.591454440  | 2.905889684  | 28.236956132 |
| O  | 2.746856171  | 2.882428240  | 29.683491489 |
| H  | 1.889299350  | 3.201434160  | 30.028671483 |
| Cu | 1.280395840  | 0.752957612  | 25.052524108 |
| Cu | 0.014172950  | 2.947712722  | 25.053115153 |
| Cu | -1.275045054 | 5.169265988  | 25.014900766 |
| Cu | -2.560901513 | 7.381695707  | 25.018008619 |
| Cu | -3.841237455 | 9.590898130  | 25.021639441 |
| Cu | -5.116132161 | 11.815634115 | 25.022545597 |
| Cu | 3.838434835  | 0.745056104  | 25.036335847 |
| Cu | 2.556899972  | 2.953275541  | 25.031023744 |
| Cu | 1.288667389  | 5.161314834  | 25.045459748 |
| Cu | -0.008107806 | 7.386621286  | 25.020544415 |
| Cu | -1.285242570 | 9.591647829  | 25.023607276 |
| Cu | -2.559623825 | 11.798147304 | 25.020018319 |
| Cu | 6.401537748  | 0.726230578  | 25.015138274 |
| Cu | 5.103146551  | 2.963392181  | 25.068126781 |
| Cu | 3.833363832  | 5.167449039  | 25.106585267 |
| Cu | 2.564582025  | 7.382959053  | 25.046114655 |
| Cu | 1.269321433  | 9.596933231  | 25.020994937 |
| Cu | -0.001947975 | 11.802892246 | 25.024180225 |
| Cu | 8.951574311  | 0.736253135  | 25.024931568 |
| Cu | 7.680593180  | 2.969976041  | 25.055981278 |
| Cu | 6.385509702  | 5.137550268  | 25.094237872 |
| Cu | 5.104441578  | 7.371881338  | 25.034986851 |
| Cu | 3.830110253  | 9.602354608  | 25.016656913 |
| Cu | 2.555510910  | 11.812689811 | 25.023969477 |
| Cu | 11.507103781 | 0.738232293  | 25.026907337 |
| Cu | 10.229836826 | 2.953087115  | 25.022409168 |
| Cu | 8.926707904  | 5.159171829  | 25.059237677 |
| Cu | 7.672133548  | 7.375234969  | 25.005068321 |
| Cu | 6.395102628  | 9.599776557  | 25.000502157 |
| Cu | 5.113150621  | 11.811696889 | 25.023560341 |
| Cu | 14.064025705 | 0.735589792  | 25.025782745 |
| Cu | 12.783903373 | 2.952937767  | 25.015487290 |
| Cu | 11.503797950 | 5.172179553  | 25.007497201 |
| Cu | 10.227149972 | 7.379184962  | 25.013818410 |
| Cu | 8.957199504  | 9.597973146  | 25.007578613 |
| Cu | 7.673041806  | 11.808326801 | 25.021367114 |
| Cu | -0.031139860 | -0.029792035 | 27.065513007 |
| Cu | -1.317781926 | 2.203873123  | 27.065450393 |
| Cu | -2.562062585 | 4.432357129  | 27.044816029 |
| Cu | -3.842467387 | 6.649522197  | 27.055814262 |
| Cu | -5.123522039 | 8.855341585  | 27.071281557 |
| Cu | -6.399587524 | 11.058054657 | 27.069255455 |
| Cu | 2.551028054  | -0.056511627 | 27.070026052 |
| Cu | 1.170958005  | 2.152472041  | 27.191512085 |
| Cu | -0.057533114 | 4.454646001  | 27.072965371 |
| Cu | -1.299302664 | 6.650422430  | 27.076323436 |
| Cu | -2.568022050 | 8.852434741  | 27.070065293 |
| Cu | -3.841776321 | 11.055112937 | 27.069237498 |
| Cu | 5.141749730  | -0.049864130 | 27.057621728 |
| Cu | 3.912923120  | 2.119705033  | 27.123055518 |
| Cu | 2.489132380  | 4.509958638  | 27.159421590 |
| Cu | 1.250161193  | 6.678678616  | 27.060759664 |
| Cu | -0.010629068 | 8.861861714  | 27.071857356 |
| Cu | -1.279612677 | 11.055617896 | 27.069431554 |
| Cu | 7.688664991  | -0.025330313 | 27.069141837 |
| Cu | 6.420120161  | 2.152397359  | 27.034840039 |
| Cu | 5.114954515  | 4.436882332  | 27.180229731 |
| Cu | 3.828775826  | 6.710080742  | 27.143855736 |
| Cu | 2.540626784  | 8.896977442  | 27.060537805 |
| Cu | 1.276564976  | 11.073411892 | 27.075404584 |
| Cu | 10.237254337 | -0.010846024 | 27.076610568 |
| Cu | 8.983111024  | 2.184384425  | 27.064559701 |
| Cu | 7.703775466  | 4.426987219  | 27.198066976 |

Cu 6.415240989 6.682723806 27.040033784  
 Cu 5.123368059 8.892134242 27.023902348  
 Cu 3.838012844 11.075616076 27.079828682  
 Cu 12.776260597 -0.009693274 27.073313747  
 Cu 11.509770670 2.215331564 27.073984249  
 Cu 10.262940936 4.429789359 27.047816132  
 Cu 8.963708201 6.671272657 27.063205187  
 Cu 7.671284146 8.870638400 27.022908680  
 Cu 6.389551248 11.069564784 27.067263843  
 O 3.979767430 6.982114313 29.508309310  
 H 3.066367109 7.229231190 29.738460498  
 H 4.604132513 5.402359359 29.592898415  
 H 4.575340046 7.771663359 29.756059641  
 O 5.536723003 9.007802231 30.148276523  
 H 5.466833925 9.700092238 29.455261493  
 H 6.500042051 8.777001672 30.172015918  
 O 11.754357460 4.976640786 30.123011894  
 O 9.136556011 5.679548354 30.699566262  
 O 8.318843001 8.380836936 30.166304248  
 O 7.657168960 4.158484717 29.225440257  
 H 10.096927383 5.519543333 30.507625290  
 H 12.188463251 5.586135890 29.488151012  
 H 8.963139072 6.638014888 30.571729275  
 H 8.235987212 4.779769546 29.797635082  
 H 8.847760854 9.117948118 30.523643122  
 H 8.521349682 8.387925373 29.193018228  
 H 11.664864599 4.157055312 29.593097408  
 O 4.964057509 4.488303564 29.418047510  
 H 6.720457026 4.234537047 29.531101889  
 H 4.238808617 3.864420460 29.683141182  
 End final coordinates

*NO-Cu111-Nafion*

CELL\_PARAMETERS (angstrom)

15.346059799 0.000000000 0.000000000  
 -7.673035145 13.290086719 0.000000000  
 0.000000000 0.000000000 50.000000000

ATOMIC\_POSITIONS (angstrom)

Cu 0.007682412 1.475569276 23.013262244  
 Cu -1.261024781 3.689347790 23.030653235  
 Cu -2.535000120 5.899688231 23.007312388  
 Cu -3.808763007 8.110578931 22.988013394  
 Cu -5.097615160 10.335268802 22.964623382  
 Cu -6.386125476 12.556859040 23.002121478  
 Cu 2.558631050 1.468683451 23.014445404  
 Cu 1.279787060 3.696291442 23.045071447  
 Cu 0.012655763 5.900145611 23.055244306  
 Cu -1.262494465 8.105235499 23.042509241  
 Cu -2.543831652 10.324276993 22.997134664  
 Cu -3.830183976 12.548026314 22.998185068  
 Cu 5.116905282 1.460617413 22.977400029  
 Cu 3.833537062 3.682020940 22.986412703  
 Cu 2.548283659 5.902007557 23.009772636  
 Cu 1.271625368 8.106720432 23.031771613  
 Cu 0.002634983 10.323030853 23.015167627  
 Cu -1.276434132 12.538681395 22.984934028  
 Cu 7.675336463 1.462379056 22.964834333  
 Cu 6.391972676 3.674172077 22.945739261  
 Cu 5.105142805 5.894030213 22.943541959  
 Cu 3.821364480 8.109171640 22.970745858  
 Cu 2.548878491 10.326977280 22.987995185  
 Cu 1.280305537 12.539922394 22.990654554  
 Cu 10.238344236 1.463412325 22.978167111  
 Cu 8.961298291 3.678912021 22.945346691  
 Cu 7.682118205 5.897494405 22.912625169

Cu 6.394327065 8.116366270 22.925324861  
 Cu 5.111815456 10.335289312 22.956162952  
 Cu 3.839154765 12.544232908 22.983632473  
 Cu 12.801644947 1.470910404 22.980393105  
 Cu 11.526187096 3.683698406 22.974828363  
 Cu 10.250542395 5.900319052 22.945902980  
 Cu 8.971278718 8.119428918 22.934305872  
 Cu 7.685407397 10.340700099 22.947561369  
 Cu 6.403234890 12.550538886 22.977289218  
 N 2.599236492 2.942267823 28.401963091  
 O 2.750628577 2.958084908 29.650331683  
 H 5.159112458 4.673334613 29.168592837  
 Cu 1.287223459 0.745867224 25.083800867  
 Cu 0.023462013 2.933397111 25.091483298  
 Cu -1.271693490 5.171627406 25.083592783  
 Cu -2.542165163 7.367947992 25.079165960  
 Cu -3.829483209 9.585647582 25.027565505  
 Cu -5.107855789 11.802099145 25.029854759  
 Cu 3.843790419 0.737402152 25.060305616  
 Cu 2.565994567 2.943807018 25.058320187  
 Cu 1.301051879 5.167883407 25.124890456  
 Cu 0.007117410 7.367208157 25.132914161  
 Cu -1.276244613 9.590421923 25.063414615  
 Cu -2.550060619 11.800731022 25.039996215  
 Cu 6.407258429 0.728018336 25.028199228  
 Cu 5.118578227 2.932560280 25.018265909  
 Cu 3.835063980 5.157455217 25.026649511  
 Cu 2.557757240 7.382182207 25.072310542  
 Cu 1.282465179 9.595482843 25.059475093  
 Cu 0.004759740 11.807048725 25.047365395  
 Cu 8.958374820 0.735073061 25.028274375  
 Cu 7.683117709 2.948348328 24.994993438  
 Cu 6.412555238 5.167005152 24.954804674  
 Cu 5.129344049 7.376070224 24.977428966  
 Cu 3.842334454 9.595082290 25.006341569  
 Cu 2.563321665 11.806179470 25.035416573  
 Cu 11.511008214 0.731407257 25.032302480  
 Cu 10.233594735 2.945488797 25.007987754  
 Cu 8.960122950 5.163946733 24.971813424  
 Cu 7.682483750 7.375395860 24.955628465  
 Cu 6.403579606 9.593607289 24.971140691  
 Cu 5.120380127 11.799428695 25.023159645  
 Cu 14.065797806 0.721176281 25.040806534  
 Cu 12.789984272 2.936505311 25.031291943  
 Cu 11.507782266 5.162301762 25.010566851  
 Cu 10.238029091 7.377525717 24.993838278  
 Cu 8.965603173 9.590906724 24.984834717  
 Cu 7.678711035 11.799905580 25.026024606  
 Cu -0.012869962 -0.034822589 27.082603377  
 Cu -1.299874542 2.187599276 27.089538634  
 Cu -2.586703669 4.401860239 27.049072831  
 Cu -3.866701146 6.629274798 27.063685522  
 Cu -5.121762276 8.841855320 27.058634117  
 Cu -6.391032955 11.043606996 27.064546564  
 Cu 2.567495206 -0.052950048 27.079081090  
 Cu 1.231042870 2.160758358 27.228859373  
 Cu -0.023838571 4.407072309 27.086961141  
 Cu -1.298612961 6.633293415 27.183255216  
 Cu -2.567208514 8.859718975 27.094015741  
 Cu -3.834340605 11.055525265 27.079589599  
 Cu 5.144183152 -0.016183637 27.076352300  
 Cu 3.920615739 2.182039570 27.136223939  
 Cu 2.621648523 4.476758152 27.157753104  
 Cu 1.323998533 6.662700887 27.176024486  
 Cu 0.007897730 8.891297372 27.102507984  
 Cu -1.273637880 11.074240544 27.097042116

Cu 7.689687430 -0.000024347 27.081856690  
 Cu 6.435172760 2.216292584 27.062015948  
 Cu 5.183549366 4.447077594 26.984591467  
 Cu 3.897334971 6.657237490 27.051408479  
 Cu 2.595123673 8.8816661782 27.081775125  
 Cu 1.293173562 11.081021737 27.097759299  
 Cu 10.235889488 -0.003175027 27.078645509  
 Cu 8.957193986 2.222008938 27.068499041  
 Cu 7.687623591 4.437326114 27.026046874  
 Cu 6.423468508 6.641397422 27.030537827  
 Cu 5.139413882 8.853405209 27.010810403  
 Cu 3.854071047 11.063258931 27.082569161  
 Cu 12.783114225 -0.020185928 27.075340935  
 Cu 11.498951344 2.209488513 27.078023530  
 Cu 10.216881688 4.422750460 27.043852518  
 Cu 8.951003761 6.637585338 27.020317925  
 Cu 7.676747836 8.849168564 26.993984288  
 Cu 6.401088003 11.047539763 27.063377532  
 O 0.260565730 5.202166591 31.149308071  
 S 0.072003957 6.373147472 30.316827709  
 C -0.102451154 7.876089394 31.461144758  
 C -1.248773634 7.785250841 32.519411270  
 O -0.983474622 6.711124777 33.346210784  
 C -1.650172326 6.565251816 34.559513162  
 F -1.137259037 7.380681634 35.503585899  
 F -2.973835982 6.815907936 34.456900523  
 F -1.467706146 5.294509407 34.937989503  
 F -1.313555415 8.961234890 33.203774476  
 F -2.446920464 7.635881881 31.873415500  
 F -0.337824675 8.966497667 30.683945275  
 F 1.080148490 8.046200792 32.111276382  
 O -1.170077374 6.420716447 29.494520828  
 O 1.280549934 6.773339591 29.504820466  
 O 3.647542431 6.677270697 30.672321282  
 H 2.751634871 6.719584957 30.193691529  
 H 4.140919613 5.793058538 30.457929298  
 H 4.276470666 7.503594198 30.460270366  
 O 5.192652233 8.628110191 30.292117758  
 H 5.026699275 9.084970259 29.433414041  
 H 6.149178581 8.380612667 30.264091198  
 O 11.637640213 5.195454555 30.157501746  
 O 9.325390381 5.769705737 30.945118573  
 O 8.010793089 7.909366824 30.026876603  
 O 7.782043175 3.846088082 30.359257870  
 H 10.313840041 5.609858309 30.595032886  
 H 12.446298428 5.759277588 30.132696372  
 H 8.922190993 6.622498345 30.585529013  
 H 8.688435690 4.969823799 30.688036446  
 H 8.524082361 8.742714327 29.979008303  
 H 7.908755212 7.673383289 29.057105103  
 H 11.584796915 4.814166319 29.247354372  
 H 7.913525355 3.526587384 29.434716937  
 O 4.941671293 4.513865675 30.129069545  
 H 6.812200151 4.011257758 30.436623198  
 H 4.225192452 3.812455427 30.083491736

End final coordinates

*NOH-Cu111-Nafion*

CELL\_PARAMETERS (angstrom)

15.346059799 0.000000000 0.000000000  
 -7.673035145 13.290086719 0.000000000  
 0.000000000 0.000000000 50.000000000

ATOMIC\_POSITIONS (angstrom)

Cu -0.000007673 1.476680320 22.978979452 0 0 0

Cu -1.278850839 3.691702335 22.978979452 0 0 0  
 Cu -2.557695540 5.906724349 22.978979452 0 0 0  
 Cu -3.836538707 8.121746364 22.978979452 0 0 0  
 Cu -5.115383407 10.336769913 22.978979452 0 0 0  
 Cu -6.394226574 12.551793462 22.978979452 0 0 0  
 Cu 2.557677125 1.476680320 22.978979452 0 0 0  
 Cu 1.278832424 3.691702335 22.978979452 0 0 0  
 Cu -0.000009208 5.906724349 22.978979452 0 0 0  
 Cu -1.278852374 8.121746364 22.978979452 0 0 0  
 Cu -2.557697075 10.336769913 22.978979452 0 0 0  
 Cu -3.836540241 12.551793462 22.978979452 0 0 0  
 Cu 5.115363457 1.476680320 22.978979452 0 0 0  
 Cu 3.836518757 3.691702335 22.978979452 0 0 0  
 Cu 2.557675590 5.906724349 22.978979452 0 0 0  
 Cu 1.278830889 8.121746364 22.978979452 0 0 0  
 Cu -0.000012277 10.336769913 22.978979452 0 0 0  
 Cu -1.278855443 12.551793462 22.978979452 0 0 0  
 Cu 7.673048255 1.476680320 22.978979452 0 0 0  
 Cu 6.394205089 3.691702335 22.978979452 0 0 0  
 Cu 5.115361923 5.906724349 22.978979452 0 0 0  
 Cu 3.836517222 8.121746364 22.978979452 0 0 0  
 Cu 2.557674056 10.336769913 22.978979452 0 0 0  
 Cu 1.278829355 12.551793462 22.978979452 0 0 0  
 Cu 10.230734588 1.476680320 22.978979452 0 0 0  
 Cu 8.951889887 3.691702335 22.978979452 0 0 0  
 Cu 7.673048255 5.906724349 22.978979452 0 0 0  
 Cu 6.394203555 8.121746364 22.978979452 0 0 0  
 Cu 5.115360388 10.336769913 22.978979452 0 0 0  
 Cu 3.836515687 12.551793462 22.978979452 0 0 0  
 Cu 12.788420921 1.476680320 22.978979452 0 0 0  
 Cu 11.509576220 3.691702335 22.978979452 0 0 0  
 Cu 10.230733053 5.906724349 22.978979452 0 0 0  
 Cu 8.951889887 8.121746364 22.978979452 0 0 0  
 Cu 7.673046721 10.336769913 22.978979452 0 0 0  
 Cu 6.394202020 12.551793462 22.978979452 0 0 0  
 N 2.562578310 3.016229853 28.275580577  
 O 2.680193165 3.113794539 29.707191553  
 H 1.919198803 3.667497303 30.006936348  
 Cu 1.279734999 0.760878976 25.060140965  
 Cu 0.014391748 2.943041089 25.043402319  
 Cu -1.282531221 5.179549621 25.025064829  
 Cu -2.557352295 7.384149364 25.038554429  
 Cu -3.841070947 9.600530884 25.021375782  
 Cu -5.116684857 11.825057357 25.022672956  
 Cu 3.832531455 0.761930554 25.050902054  
 Cu 2.552544245 2.957096848 25.030200114  
 Cu 1.284024853 5.183075112 25.047008177  
 Cu -0.010160205 7.385094099 25.053288537  
 Cu -1.290392696 9.601861576 25.020899885  
 Cu -2.564001256 11.812139757 25.021421637  
 Cu 6.392918414 0.737987153 25.021477671  
 Cu 5.091644022 2.964541169 25.082007588  
 Cu 3.838734705 5.179635861 25.101569853  
 Cu 2.559929107 7.383079935 25.069547552  
 Cu 1.268848876 9.602895260 25.018794850  
 Cu -0.005850634 11.814785084 25.026874513  
 Cu 8.949798276 0.740932899 25.025154283  
 Cu 7.670036981 2.954889073 25.015707181  
 Cu 6.366714499 5.156639017 25.047875092  
 Cu 5.105215901 7.383386211 25.037864996  
 Cu 3.835478900 9.607700651 25.012436965  
 Cu 2.554937009 11.816894196 25.023699127  
 Cu 11.504204114 0.741832224 25.029028615  
 Cu 10.226286219 2.952893869 25.014780052  
 Cu 8.947802278 5.174865160 25.002565406  
 Cu 7.673226139 7.385716112 24.995013399

Cu 6.398678941 9.607551753 25.000239354  
 Cu 5.113936367 11.815530956 25.025449462  
 Cu 14.061609478 0.735040977 25.025411913  
 Cu 12.782136913 2.950267320 25.012334804  
 Cu 11.500799877 5.174945113 25.008749915  
 Cu 10.229925335 7.391140549 25.011847300  
 Cu 8.958118488 9.605521131 25.008927498  
 Cu 7.674026027 11.814926935 25.023997756  
 Cu -0.029205035 -0.016303549 27.067707769  
 Cu -1.322924233 2.202527077 27.062512751  
 Cu -2.594121983 4.415487251 27.030851819  
 Cu -3.867526727 6.643353799 27.060470750  
 Cu -5.124876414 8.859354728 27.069782563  
 Cu -6.399467412 11.066009814 27.070492303  
 Cu 2.546542654 -0.043262291 27.073758703  
 Cu 1.179999600 2.169062429 27.223640456  
 Cu -0.064682630 4.424385943 27.029271717  
 Cu -1.328402860 6.645534094 27.115565876  
 Cu -2.575475683 8.869186226 27.069612680  
 Cu -3.845621313 11.069120058 27.071570858  
 Cu 5.130607416 -0.015753771 27.061609354  
 Cu 3.881765794 2.152304940 27.176428212  
 Cu 2.517268885 4.520639640 27.094928898  
 Cu 1.247108359 6.695266744 27.098436936  
 Cu -0.022091113 8.905220318 27.055111147  
 Cu -1.290193519 11.080998669 27.071889852  
 Cu 7.679223192 -0.001155418 27.074586703  
 Cu 6.430098193 2.191926653 27.060237810  
 Cu 5.175745927 4.434502430 27.186777597  
 Cu 3.868463649 6.717745998 27.145406156  
 Cu 2.554431755 8.929996177 27.044191036  
 Cu 1.272303341 11.094486527 27.076380112  
 Cu 10.225204444 0.007040757 27.074149950  
 Cu 8.952607645 2.221341807 27.071022454  
 Cu 7.704126151 4.438382934 27.037013358  
 Cu 6.442302794 6.673368494 27.037845925  
 Cu 5.136235837 8.907490986 27.025089494  
 Cu 3.838967498 11.091715705 27.080674466  
 Cu 12.771420546 -0.001832457 27.074021815  
 Cu 11.489904262 2.221685381 27.075942982  
 Cu 10.219837366 4.430803097 27.048172491  
 Cu 8.954542158 6.652483409 27.046643435  
 Cu 7.675195482 8.874891995 27.022999908  
 Cu 6.393504129 11.079489668 27.073083007  
 O 0.511580415 5.056760701 30.943660552  
 S 0.122625188 6.261329254 30.213790222  
 C -0.043805406 7.703995805 31.440768484  
 C -1.201514972 7.619660278 32.486707775  
 O -0.977929287 6.516765422 33.291963407  
 C -1.613591009 6.416288632 34.528882323  
 F -1.027945214 7.208765489 35.449561641  
 F -2.923755872 6.738562574 34.463533799  
 F -1.488505104 5.139807543 34.912092448  
 F -1.227811076 8.782338265 33.197088000  
 F -2.401686672 7.524830216 31.838194654  
 F -0.257131134 8.820599136 30.694008988  
 F 1.136497389 7.832536734 32.102886639  
 O -1.192750430 6.229418062 29.529727742  
 O 1.208752994 6.805452127 29.332730283  
 O 3.906802497 6.837714319 29.358899306  
 H 2.946209028 6.881981961 29.595440199  
 H 4.708852875 5.389412809 29.561746001  
 H 4.378481430 7.669509187 29.693655057  
 O 5.299060861 8.918718129 30.205043659  
 H 5.265874715 9.633009749 29.532964288  
 H 6.244848260 8.645276076 30.232678060

O 11.544921774 5.054231537 30.183363534  
 O 9.188684255 5.661646078 30.919728327  
 O 8.099657818 7.947388932 30.069179981  
 O 7.638046342 3.836536352 30.201545782  
 H 10.169680403 5.492620047 30.601247164  
 H 12.358524916 5.606836197 30.174742775  
 H 8.844344780 6.554150959 30.595592473  
 H 8.524025411 4.884664394 30.584090525  
 H 8.698954047 8.720731790 30.085067072  
 H 8.005093562 7.770312494 29.087055651  
 H 11.511898485 4.668549534 29.275133313  
 H 7.957504248 3.372368978 29.393522103  
 O 5.088558631 4.465702717 29.455800143  
 H 6.693839490 4.093634820 29.988024579  
 H 4.327090500 3.873965597 29.700209166  
 End final coordinates

## SECOND PROTONATION ON CU111 Surfaces

NOH-w-Eigen-Cu111

CELL\_PARAMETERS (angstrom)  
 15.346059799 0.000000000 0.000000000  
 -7.673035145 13.290086719 0.000000000  
 0.000000000 0.000000000 50.000000000

ATOMIC\_POSITIONS (angstrom)

Cu -0.000007673 1.476680320 22.978979452 0 0 0  
 Cu -1.278850839 3.691702335 22.978979452 0 0 0  
 Cu -2.557695540 5.906724349 22.978979452 0 0 0  
 Cu -3.836538707 8.121746364 22.978979452 0 0 0  
 Cu -5.115383407 10.336769913 22.978979452 0 0 0  
 Cu -6.394226574 12.551793462 22.978979452 0 0 0  
 Cu 2.557677125 1.476680320 22.978979452 0 0 0  
 Cu 1.278832424 3.691702335 22.978979452 0 0 0  
 Cu -0.000009208 5.906724349 22.978979452 0 0 0  
 Cu -1.278852374 8.121746364 22.978979452 0 0 0  
 Cu -2.557697075 10.336769913 22.978979452 0 0 0  
 Cu -3.836540241 12.551793462 22.978979452 0 0 0  
 Cu 5.115363457 1.476680320 22.978979452 0 0 0  
 Cu 3.836518757 3.691702335 22.978979452 0 0 0  
 Cu 2.557675590 5.906724349 22.978979452 0 0 0  
 Cu 1.278830889 8.121746364 22.978979452 0 0 0  
 Cu -0.000012277 10.336769913 22.978979452 0 0 0  
 Cu -1.278855443 12.551793462 22.978979452 0 0 0  
 Cu 7.673048255 1.476680320 22.978979452 0 0 0  
 Cu 6.394205089 3.691702335 22.978979452 0 0 0  
 Cu 5.115361923 5.906724349 22.978979452 0 0 0  
 Cu 3.836517222 8.121746364 22.978979452 0 0 0  
 Cu 2.557674056 10.336769913 22.978979452 0 0 0  
 Cu 1.278829355 12.551793462 22.978979452 0 0 0  
 Cu 10.230734588 1.476680320 22.978979452 0 0 0  
 Cu 8.951889887 3.691702335 22.978979452 0 0 0  
 Cu 7.673048255 5.906724349 22.978979452 0 0 0  
 Cu 6.394203555 8.121746364 22.978979452 0 0 0  
 Cu 5.115360388 10.336769913 22.978979452 0 0 0  
 Cu 3.836515687 12.551793462 22.978979452 0 0 0  
 Cu 12.788420921 1.476680320 22.978979452 0 0 0  
 Cu 11.509576220 3.691702335 22.978979452 0 0 0  
 Cu 10.230733053 5.906724349 22.978979452 0 0 0  
 Cu 8.951889887 8.121746364 22.978979452 0 0 0  
 Cu 7.673046721 10.336769913 22.978979452 0 0 0  
 Cu 6.394202020 12.551793462 22.978979452 0 0 0  
 N 2.604019983 2.926056425 28.236588806  
 O 2.751768000 2.923317279 29.688360009  
 H 1.903588247 3.279744750 30.020483652  
 Cu 1.280032657 0.754964110 25.053716827

Cu 0.013319642 2.948939455 25.054630023  
 Cu -1.276254198 5.170866929 25.017604558  
 Cu -2.557611830 7.385698184 25.018393130  
 Cu -3.838857731 9.595761114 25.024683047  
 Cu -5.114844408 11.818511875 25.024070802  
 Cu 3.839786830 0.749628578 25.039961927  
 Cu 2.557173511 2.953682948 25.035821550  
 Cu 1.288527718 5.162797169 25.044262275  
 Cu -0.006385001 7.388330782 25.021197371  
 Cu -1.282850509 9.596318862 25.025494201  
 Cu -2.558438234 11.803191208 25.021759920  
 Cu 6.400860223 0.731872320 25.021365055  
 Cu 5.105376225 2.960686154 25.066378019  
 Cu 3.834509018 5.166084979 25.104819643  
 Cu 2.566669426 7.384312358 25.044918414  
 Cu 1.271912169 9.600385173 25.022026394  
 Cu -0.000187722 11.809856117 25.028285628  
 Cu 8.955212592 0.740588394 25.028592053  
 Cu 7.680874702 2.954199845 25.013402743  
 Cu 6.370301446 5.156472936 25.047217746  
 Cu 5.108049694 7.378158104 25.035615385  
 Cu 3.832708819 9.605714941 25.017175252  
 Cu 2.557594839 11.816052543 25.026287066  
 Cu 11.506938887 0.743264293 25.030595972  
 Cu 10.231683287 2.954532635 25.018743090  
 Cu 8.952826467 5.174913022 25.005628689  
 Cu 7.673207547 7.382923209 25.000728143  
 Cu 6.397699344 9.603391936 25.002757411  
 Cu 5.113961285 11.815364834 25.026497430  
 Cu 14.062029960 0.738459413 25.027815410  
 Cu 12.783737222 2.956411617 25.019805906  
 Cu 11.507834680 5.173349191 25.011317672  
 Cu 10.231471636 7.388935377 25.012170269  
 Cu 8.958209437 9.602278207 25.011483145  
 Cu 7.673046152 11.811134809 25.024380446  
 Cu -0.029534264 -0.022124518 27.067074163  
 Cu -1.318499386 2.210321238 27.068573871  
 Cu -2.572243324 4.439108198 27.054226945  
 Cu -3.843619972 6.654520973 27.054709346  
 Cu -5.124654066 8.854855903 27.074736725  
 Cu -6.397282586 11.063500054 27.072173635  
 Cu 2.556143630 -0.047927222 27.069478462  
 Cu 1.181249188 2.163153422 27.195786537  
 Cu -0.056358350 4.458526266 27.072518720  
 Cu -1.298581684 6.654460001 27.078072798  
 Cu -2.565603044 8.858315906 27.071889344  
 Cu -3.839053968 11.061790780 27.072389271  
 Cu 5.149242443 -0.033508668 27.059060658  
 Cu 3.932438577 2.135523383 27.133034616  
 Cu 2.509076267 4.519658336 27.154076041  
 Cu 1.254974836 6.681915921 27.061605142  
 Cu -0.006691213 8.867662167 27.072791345  
 Cu -1.276605144 11.064818895 27.071943515  
 Cu 7.690605833 -0.008169792 27.076242590  
 Cu 6.449105126 2.192475031 27.053244973  
 Cu 5.169699325 4.441454264 27.184644424  
 Cu 3.843390115 6.704554843 27.137037783  
 Cu 2.547645582 8.896312527 27.060922969  
 Cu 1.279208630 11.080350626 27.077397204  
 Cu 10.232652332 0.003960936 27.077565637  
 Cu 8.965107044 2.222969339 27.078493745  
 Cu 7.704802938 4.438117110 27.037623345  
 Cu 6.432180799 6.665988572 27.046931896  
 Cu 5.128901814 8.890189829 27.024729219  
 Cu 3.839151717 11.080108042 27.082543409  
 Cu 12.774731171 -0.002894943 27.076073336

Cu 11.500187164 2.227205794 27.079074820  
 Cu 10.229705813 4.436919466 27.051933082  
 Cu 8.960253299 6.652007360 27.049628425  
 Cu 7.674253012 8.869469513 27.030798972  
 Cu 6.391384483 11.072129448 27.072218039  
 O 3.985020063 6.959211967 29.542111053  
 H 3.061207554 7.202716131 29.729907375  
 H 4.644362270 5.399495398 29.654165447  
 H 4.561780199 7.760481075 29.779446708  
 O 5.562584942 8.994108003 30.173205929  
 H 5.530634271 9.656117596 29.446179372  
 H 6.496960194 8.681275950 30.176761331  
 O 11.428392956 4.922093602 30.086339101  
 O 9.030905084 5.519245731 30.860907671  
 O 8.317175618 7.987481272 30.109933748  
 O 7.467946148 3.747575532 30.178892597  
 H 9.979203430 5.299594408 30.518586988  
 H 11.802014698 5.596950656 29.472581407  
 H 8.770726286 6.445440713 30.558005085  
 H 8.307224995 4.750972743 30.515458353  
 H 8.940884222 8.690754144 30.375653198  
 H 8.386627726 7.975935268 29.109788314  
 H 11.418573224 4.122117886 29.511735302  
 O 4.999589006 4.474293332 29.527792768  
 H 6.518999041 4.041700428 29.999092336  
 H 4.233242699 3.871158204 29.731421338  
 H 7.758277984 3.326355052 29.332890496  
 End final coordinates

*NOH-w-Eigen-Cu111-Nafion*

CELL\_PARAMETERS (angstrom)  
 15.346059799 0.000000000 0.000000000  
 -7.673035145 13.290086719 0.000000000  
 0.000000000 0.000000000 50.000000000

ATOMIC\_POSITIONS (angstrom)

Cu -0.000007673 1.476680320 22.978979452 0 0 0  
 Cu -1.278850839 3.691702335 22.978979452 0 0 0  
 Cu -2.557695540 5.906724349 22.978979452 0 0 0  
 Cu -3.836538707 8.121746364 22.978979452 0 0 0  
 Cu -5.115383407 10.336769913 22.978979452 0 0 0  
 Cu -6.394226574 12.551793462 22.978979452 0 0 0  
 Cu 2.557677125 1.476680320 22.978979452 0 0 0  
 Cu 1.278832424 3.691702335 22.978979452 0 0 0  
 Cu -0.000009208 5.906724349 22.978979452 0 0 0  
 Cu -1.278852374 8.121746364 22.978979452 0 0 0  
 Cu -2.557697075 10.336769913 22.978979452 0 0 0  
 Cu -3.836540241 12.551793462 22.978979452 0 0 0  
 Cu 5.115363457 1.476680320 22.978979452 0 0 0  
 Cu 3.836518757 3.691702335 22.978979452 0 0 0  
 Cu 2.557675590 5.906724349 22.978979452 0 0 0  
 Cu 1.278830889 8.121746364 22.978979452 0 0 0  
 Cu -0.000012277 10.336769913 22.978979452 0 0 0  
 Cu -1.278855443 12.551793462 22.978979452 0 0 0  
 Cu 7.673048255 1.476680320 22.978979452 0 0 0  
 Cu 6.394205089 3.691702335 22.978979452 0 0 0  
 Cu 5.115361923 5.906724349 22.978979452 0 0 0  
 Cu 3.836517222 8.121746364 22.978979452 0 0 0  
 Cu 2.557674056 10.336769913 22.978979452 0 0 0  
 Cu 1.278829355 12.551793462 22.978979452 0 0 0  
 Cu 10.230734588 1.476680320 22.978979452 0 0 0  
 Cu 8.951889887 3.691702335 22.978979452 0 0 0  
 Cu 7.673048255 5.906724349 22.978979452 0 0 0  
 Cu 6.394203555 8.121746364 22.978979452 0 0 0  
 Cu 5.115360388 10.336769913 22.978979452 0 0 0  
 Cu 3.836515687 12.551793462 22.978979452 0 0 0

Cu 12.788420921 1.476680320 22.978979452 0 0 0  
 Cu 11.509576220 3.691702335 22.978979452 0 0 0  
 Cu 10.230733053 5.906724349 22.978979452 0 0 0  
 Cu 8.951889887 8.121746364 22.978979452 0 0 0  
 Cu 7.673046721 10.336769913 22.978979452 0 0 0  
 Cu 6.394202020 12.551793462 22.978979452 0 0 0  
 N 2.505279059 3.013585835 28.295010588  
 O 2.512927759 3.061820417 29.743381285  
 H 1.725427964 3.598232172 30.003661494  
 Cu 1.273741513 0.761359447 25.058809104  
 Cu 0.009026981 2.947213166 25.040612494  
 Cu -1.279340282 5.181372910 25.026125851  
 Cu -2.557488902 7.389042937 25.037455298  
 Cu -3.842397876 9.606527973 25.022311751  
 Cu -5.119864240 11.828783031 25.025109086  
 Cu 3.824897214 0.768121166 25.062431089  
 Cu 2.547318949 2.959952605 25.043174709  
 Cu 1.285633100 5.180208219 25.059263077  
 Cu -0.008881599 7.386925765 25.056986259  
 Cu -1.289645129 9.607013044 25.022389827  
 Cu -2.565499069 11.820894496 25.025220657  
 Cu 6.390121627 0.746540108 25.029765149  
 Cu 5.088091246 2.951543698 25.058273595  
 Cu 3.818286861 5.169095502 25.040733097  
 Cu 2.544197826 7.397623832 25.039368273  
 Cu 1.269680449 9.609821242 25.025264718  
 Cu -0.007139803 11.821357886 25.028842297  
 Cu 8.946505621 0.747333903 25.028285505  
 Cu 7.665176626 2.959771898 25.015753629  
 Cu 6.382386355 5.175391529 25.009317337  
 Cu 5.119204591 7.394395984 25.007670735  
 Cu 3.832595748 9.611004495 25.014129004  
 Cu 2.552980176 11.820602628 25.027226656  
 Cu 11.499226077 0.746018291 25.029981357  
 Cu 10.221976345 2.958364904 25.018432827  
 Cu 8.946137589 5.176513356 25.006591527  
 Cu 7.670414224 7.389634980 25.007159179  
 Cu 6.393671419 9.610498437 25.007265913  
 Cu 5.108441159 11.818147819 25.028667398  
 Cu 14.055985934 0.737680587 25.025804641  
 Cu 12.777748718 2.954450319 25.012050515  
 Cu 11.498085756 5.179063613 25.010334791  
 Cu 10.228424628 7.395323940 25.014252273  
 Cu 8.954652067 9.608828493 25.013639227  
 Cu 7.668237342 11.815450499 25.027180842  
 Cu -0.037292935 -0.015435522 27.067336863  
 Cu -1.327915642 2.209465485 27.062192272  
 Cu -2.589873487 4.425540233 27.026267530  
 Cu -3.864991489 6.650473346 27.058970286  
 Cu -5.128367001 8.866004357 27.070429610  
 Cu -6.404783695 11.072153770 27.073393036  
 Cu 2.543071273 -0.029217718 27.077834285  
 Cu 1.171757066 2.169965570 27.198693799  
 Cu -0.051395607 4.433660963 27.036619121  
 Cu -1.309763709 6.652048025 27.108553709  
 Cu -2.575037632 8.875625923 27.069010447  
 Cu -3.847760280 11.079391638 27.074018788  
 Cu 5.120951959 0.005571610 27.070879594  
 Cu 3.886248290 2.198087038 27.220853160  
 Cu 2.569910920 4.545052590 27.143707259  
 Cu 1.280523549 6.700004244 27.108170119  
 Cu -0.017532970 8.904190315 27.058266509  
 Cu -1.292490340 11.091872812 27.072387236  
 Cu 7.668547756 0.015549461 27.076697136  
 Cu 6.406244036 2.232903486 27.080680302  
 Cu 5.147212491 4.471803848 27.058671676

Cu 3.864483392 6.693385321 27.042667418  
 Cu 2.565897932 8.904601796 27.061144062  
 Cu 1.270272026 11.095527778 27.078047394  
 Cu 10.216766742 0.014973560 27.075917137  
 Cu 8.937135096 2.237269947 27.072706911  
 Cu 7.666252179 4.454744088 27.041914121  
 Cu 6.404328140 6.665545717 27.068452234  
 Cu 5.117544234 8.878079343 27.034773773  
 Cu 3.832958445 11.086071100 27.084235609  
 Cu 12.764691490 0.003335768 27.073012443  
 Cu 11.484868511 2.230258331 27.074076924  
 Cu 10.209363401 4.441145405 27.055288896  
 Cu 8.943761044 6.655621213 27.047864956  
 Cu 7.665423668 8.873899073 27.033263071  
 Cu 6.382576242 11.073265767 27.075456461  
 O 0.527065111 5.037846166 30.999773573  
 S 0.190053755 6.263819762 30.277696147  
 C 0.015392916 7.687516635 31.526802806  
 C -1.173910857 7.605145633 32.535413519  
 O -0.979707789 6.496834666 33.342451829  
 C -1.644245511 6.403052511 34.563144934  
 F -1.065603588 7.181739350 35.500167851  
 F -2.947771288 6.749782769 34.469257283  
 F -1.551989663 5.122836795 34.945077695  
 F -1.218004688 8.764840753 33.250795064  
 F -2.356126750 7.516791940 31.852922684  
 F -0.153632619 8.821477194 30.794778777  
 F 1.175034289 7.782880067 32.229272515  
 O -1.107065980 6.273228156 29.562454721  
 O 1.316561423 6.790667321 29.434744044  
 O 3.748016297 6.756871570 30.599222786  
 H 2.878972129 6.830909806 30.103506196  
 H 4.191648517 5.782887347 30.451011155  
 H 4.397026745 7.553758135 30.409607109  
 O 5.341610410 8.715148734 30.309811400  
 H 5.204591783 9.198868048 29.461854964  
 H 6.288946630 8.439970676 30.287376217  
 O 11.690188012 5.120571384 30.152329953  
 O 9.415090375 5.705312989 30.953314184  
 O 8.120635469 7.841207700 30.060460058  
 O 7.888220264 3.765401014 30.214549677  
 H 10.418656696 5.556011061 30.592931688  
 H 12.512864934 5.665557470 30.153629166  
 H 8.986846255 6.557692736 30.604608027  
 H 8.826988739 4.905610000 30.669239758  
 H 8.665615473 8.653289613 29.996048752  
 H 7.985984117 7.607156839 29.093307078  
 H 11.616087713 4.802614067 29.216578683  
 H 8.003692093 3.540739221 29.252306485  
 O 4.680451222 4.468174846 30.398100617  
 H 5.390457313 4.314416692 29.741296979  
 H 3.910457769 3.868357217 30.146561569  
 H 7.916117112 2.914166899 30.687669436  
 End final coordinates

*N-OH<sub>2</sub>-Cu111*

CELL\_PARAMETERS (angstrom)  
 15.346059799 0.000000000 0.000000000  
 -7.673035145 13.290086719 0.000000000  
 0.000000000 0.000000000 50.000000000

ATOMIC\_POSITIONS (angstrom)

Cu -0.000007673 1.476683389 22.979020887 0 0 0  
 Cu -1.278852374 3.691708473 22.979020887 0 0 0  
 Cu -2.557700144 5.906735091 22.979020887 0 0 0  
 Cu -3.836544845 8.121760175 22.979020887 0 0 0



|    |              |              |              |   |   |   |    |              |              |              |
|----|--------------|--------------|--------------|---|---|---|----|--------------|--------------|--------------|
| Cu | -5.115392615 | 10.336788328 | 22.979020887 | 0 | 0 | 0 | Cu | 12.772442687 | 2.958676258  | 25.008888632 |
| Cu | -6.394237316 | 12.551816481 | 22.979020887 | 0 | 0 | 0 | Cu | 11.500371214 | 5.178748881  | 25.007153089 |
| Cu | 2.557681729  | 1.476683389  | 22.979020887 | 0 | 0 | 0 | Cu | 10.229153372 | 7.385564527  | 25.013094770 |
| Cu | 1.278833959  | 3.691708473  | 22.979020887 | 0 | 0 | 0 | Cu | 8.959259815  | 9.599029686  | 25.003282116 |
| Cu | -0.00009208  | 5.906735091  | 22.979020887 | 0 | 0 | 0 | Cu | 7.676284843  | 11.812745703 | 25.026597064 |
| Cu | -1.278853909 | 8.121760175  | 22.979020887 | 0 | 0 | 0 | Cu | -0.052690209 | -0.032382992 | 27.073352875 |
| Cu | -2.557701679 | 10.336788328 | 22.979020887 | 0 | 0 | 0 | Cu | -1.336434674 | 2.227819107  | 27.050683704 |
| Cu | -3.836546380 | 12.551816481 | 22.979020887 | 0 | 0 | 0 | Cu | -2.575946104 | 4.442128835  | 27.038246977 |
| Cu | 5.115372665  | 1.476683389  | 22.979020887 | 0 | 0 | 0 | Cu | -3.842255751 | 6.657295657  | 27.056058040 |
| Cu | 3.836524895  | 3.691708473  | 22.979020887 | 0 | 0 | 0 | Cu | -5.121462916 | 8.854321957  | 27.070017835 |
| Cu | 2.557680194  | 5.906735091  | 22.979020887 | 0 | 0 | 0 | Cu | -6.401677026 | 11.045149276 | 27.058481301 |
| Cu | 1.278832424  | 8.121760175  | 22.979020887 | 0 | 0 | 0 | Cu | 2.545885878  | -0.084345091 | 27.177508631 |
| Cu | -0.000012277 | 10.336788328 | 22.979020887 | 0 | 0 | 0 | Cu | 1.154526746  | 2.215501694  | 27.087589249 |
| Cu | -1.278856978 | 12.551816481 | 22.979020887 | 0 | 0 | 0 | Cu | -0.067061567 | 4.449778125  | 27.041119171 |
| Cu | 7.673062067  | 1.476683389  | 22.979020887 | 0 | 0 | 0 | Cu | -1.300557688 | 6.657354452  | 27.069923597 |
| Cu | 6.394215831  | 3.691708473  | 22.979020887 | 0 | 0 | 0 | Cu | -2.564201317 | 8.857454354  | 27.073199883 |
| Cu | 5.115371131  | 5.906735091  | 22.979020887 | 0 | 0 | 0 | Cu | -3.836432765 | 11.047906838 | 27.057514980 |
| Cu | 3.836523360  | 8.121760175  | 22.979020887 | 0 | 0 | 0 | Cu | 5.156131110  | -0.039785169 | 27.066048457 |
| Cu | 2.557678660  | 10.336788328 | 22.979020887 | 0 | 0 | 0 | Cu | 3.899420982  | 2.186500132  | 27.102072091 |
| Cu | 1.278830889  | 12.551816481 | 22.979020887 | 0 | 0 | 0 | Cu | 2.500239867  | 4.479163752  | 27.182141722 |
| Cu | 10.230753003 | 1.476683389  | 22.979020887 | 0 | 0 | 0 | Cu | 1.242446258  | 6.680195463  | 27.056191317 |
| Cu | 8.951905233  | 3.691708473  | 22.979020887 | 0 | 0 | 0 | Cu | -0.010858689 | 8.867520373  | 27.070738852 |
| Cu | 7.673062067  | 5.906735091  | 22.979020887 | 0 | 0 | 0 | Cu | -1.276207586 | 11.066850060 | 27.074924240 |
| Cu | 6.394214297  | 8.121760175  | 22.979020887 | 0 | 0 | 0 | Cu | 7.684567150  | -0.008819793 | 27.073678798 |
| Cu | 5.115369596  | 10.336788328 | 22.979020887 | 0 | 0 | 0 | Cu | 6.427942296  | 2.181858220  | 27.017251405 |
| Cu | 3.836521826  | 12.551816481 | 22.979020887 | 0 | 0 | 0 | Cu | 5.146417203  | 4.429156888  | 27.132251747 |
| Cu | 12.788443940 | 1.476683389  | 22.979020887 | 0 | 0 | 0 | Cu | 3.833281378  | 6.715053024  | 27.147288836 |
| Cu | 11.509596170 | 3.691708473  | 22.979020887 | 0 | 0 | 0 | Cu | 2.540904609  | 8.897315904  | 27.060347630 |
| Cu | 10.230751469 | 5.906735091  | 22.979020887 | 0 | 0 | 0 | Cu | 1.276183374  | 11.079724594 | 27.074487580 |
| Cu | 8.951905233  | 8.121760175  | 22.979020887 | 0 | 0 | 0 | Cu | 10.231856753 | -0.004182565 | 27.070178850 |
| Cu | 7.673060532  | 10.336788328 | 22.979020887 | 0 | 0 | 0 | Cu | 8.978453246  | 2.187716869  | 27.039756313 |
| Cu | 6.394212762  | 12.551816481 | 22.979020887 | 0 | 0 | 0 | Cu | 7.727237894  | 4.429553725  | 27.161032988 |
| N  | 2.509659042  | 1.501735133  | 28.132059268 |   |   |   | Cu | 6.429186477  | 6.686434659  | 27.025010601 |
| O  | 2.503860957  | 4.077383182  | 29.313646378 |   |   |   | Cu | 5.127104676  | 8.896988857  | 27.015066019 |
| H  | 2.315982535  | 3.104635631  | 29.211693101 |   |   |   | Cu | 3.835623358  | 11.078754871 | 27.077439588 |
| Cu | 1.277112664  | 0.733376132  | 25.040150145 |   |   |   | Cu | 12.773058024 | -0.002200001 | 27.076712768 |
| Cu | -0.006415846 | 2.955232770  | 25.025241498 |   |   |   | Cu | 11.498738963 | 2.219983584  | 27.076146165 |
| Cu | -1.288021834 | 5.182724562  | 25.006008360 |   |   |   | Cu | 10.257617973 | 4.431917166  | 27.054321779 |
| Cu | -2.560959079 | 7.390087697  | 25.018305632 |   |   |   | Cu | 8.962044152  | 6.672840241  | 27.060589029 |
| Cu | -3.838254211 | 9.592975352  | 25.018361691 |   |   |   | Cu | 7.671742108  | 8.873644228  | 27.021983576 |
| Cu | -5.115347459 | 11.828616033 | 25.046823122 |   |   |   | Cu | 6.385753231  | 11.074911335 | 27.072657633 |
| Cu | 3.832245737  | 0.734105029  | 25.039637642 |   |   |   | O  | 4.057496597  | 6.928210136  | 29.452461708 |
| Cu | 2.554011489  | 2.972369706  | 25.071056127 |   |   |   | H  | 3.177474495  | 6.955388092  | 29.868560618 |
| Cu | 1.288957133  | 5.162601380  | 25.056796972 |   |   |   | H  | 4.942052570  | 5.477290365  | 29.507218364 |
| Cu | -0.006620803 | 7.387788998  | 25.019827973 |   |   |   | H  | 4.571000298  | 7.765313414  | 29.727344290 |
| Cu | -1.283518060 | 9.599310394  | 25.026071844 |   |   |   | O  | 5.492330746  | 9.008416140  | 30.151158528 |
| Cu | -2.563752083 | 11.807681765 | 25.026311199 |   |   |   | H  | 5.413226561  | 9.706335957  | 29.465098316 |
| Cu | 6.391849972  | 0.736126598  | 25.013043628 |   |   |   | H  | 6.456213614  | 8.780990191  | 30.166009696 |
| Cu | 5.103091818  | 2.967963422  | 25.054980587 |   |   |   | O  | 11.850201156 | 5.152179379  | 30.115616750 |
| Cu | 3.833754838  | 5.169868869  | 25.115904278 |   |   |   | O  | 9.238044521  | 5.728396208  | 30.704396750 |
| Cu | 2.565523821  | 7.381863974  | 25.047221903 |   |   |   | O  | 8.291562550  | 8.360178114  | 30.157688386 |
| Cu | 1.270218321  | 9.598596467  | 25.020633733 |   |   |   | O  | 7.758021454  | 4.130741248  | 29.411879678 |
| Cu | -0.000230303 | 11.810728781 | 25.026227685 |   |   |   | H  | 10.202364717 | 5.622451506  | 30.476804649 |
| Cu | 8.948013869  | 0.733861058  | 25.015386563 |   |   |   | H  | 12.304634357 | 5.789329723  | 29.524392057 |
| Cu | 7.681925553  | 2.972938798  | 25.033591056 |   |   |   | H  | 8.993976513  | 6.672265466  | 30.563397328 |
| Cu | 6.395354293  | 5.152367374  | 25.066773220 |   |   |   | H  | 8.389372594  | 4.787563117  | 29.929583496 |
| Cu | 5.102926518  | 7.371734503  | 25.032706358 |   |   |   | H  | 8.809658984  | 9.113959903  | 30.495269799 |
| Cu | 3.828345026  | 9.602768308  | 25.013818740 |   |   |   | H  | 8.478446119  | 8.358870371  | 29.179410139 |
| Cu | 2.555063244  | 11.814505596 | 25.026629041 |   |   |   | H  | 11.826117426 | 4.341427307  | 29.563794367 |
| Cu | 11.505616014 | 0.740019595  | 25.027266895 |   |   |   | O  | 5.164645034  | 4.527091331  | 29.304147438 |
| Cu | 10.230323586 | 2.956360919  | 25.015107459 |   |   |   | H  | 6.123078696  | 4.349587097  | 29.539320349 |
| Cu | 8.938877196  | 5.167641773  | 25.047494229 |   |   |   | H  | 3.468142774  | 4.089439998  | 29.538282261 |
| Cu | 7.676065697  | 7.384072094  | 24.999531890 |   |   |   | H  | 8.099334024  | 3.226027785  | 29.536914536 |
| Cu | 6.395744787  | 9.606040609  | 24.999765086 |   |   |   |    |              |              |              |
| Cu | 5.110388827  | 11.815906337 | 25.025171733 |   |   |   |    |              |              |              |
| Cu | 14.063817240 | 0.743643267  | 25.029203486 |   |   |   |    |              |              |              |

End final coordinates

N-OH<sub>2</sub>-CuIII-Nafion

CELL\_PARAMETERS (angstrom)

15.346059799 0.000000000 0.000000000  
-7.673035145 13.290086719 0.000000000  
0.000000000 0.000000000 50.000000000

ATOMIC\_POSITIONS (angstrom)

Cu -0.000007673 1.476680320 22.978979452 0 0 0  
Cu -1.278850839 3.691702335 22.978979452 0 0 0  
Cu -2.557695540 5.906724349 22.978979452 0 0 0  
Cu -3.836538707 8.121746364 22.978979452 0 0 0  
Cu -5.115383407 10.336769913 22.978979452 0 0 0  
Cu -6.394226574 12.551793462 22.978979452 0 0 0  
Cu 2.557677125 1.476680320 22.978979452 0 0 0  
Cu 1.278832424 3.691702335 22.978979452 0 0 0  
Cu -0.000009208 5.906724349 22.978979452 0 0 0  
Cu -1.278852374 8.121746364 22.978979452 0 0 0  
Cu -2.557697075 10.336769913 22.978979452 0 0 0  
Cu -3.836540241 12.551793462 22.978979452 0 0 0  
Cu 5.115363457 1.476680320 22.978979452 0 0 0  
Cu 3.836518757 3.691702335 22.978979452 0 0 0  
Cu 2.557675590 5.906724349 22.978979452 0 0 0  
Cu 1.278830889 8.121746364 22.978979452 0 0 0  
Cu -0.000012277 10.336769913 22.978979452 0 0 0  
Cu -1.278855443 12.551793462 22.978979452 0 0 0  
Cu 7.673048255 1.476680320 22.978979452 0 0 0  
Cu 6.394205089 3.691702335 22.978979452 0 0 0  
Cu 5.115361923 5.906724349 22.978979452 0 0 0  
Cu 3.836517222 8.121746364 22.978979452 0 0 0  
Cu 2.557674056 10.336769913 22.978979452 0 0 0  
Cu 1.278829355 12.551793462 22.978979452 0 0 0  
Cu 10.230734588 1.476680320 22.978979452 0 0 0  
Cu 8.951889887 3.691702335 22.978979452 0 0 0  
Cu 7.673048255 5.906724349 22.978979452 0 0 0  
Cu 6.394203555 8.121746364 22.978979452 0 0 0  
Cu 5.115360388 10.336769913 22.978979452 0 0 0  
Cu 3.836515687 12.551793462 22.978979452 0 0 0  
Cu 12.788420921 1.476680320 22.978979452 0 0 0  
Cu 11.509576220 3.691702335 22.978979452 0 0 0  
Cu 10.230733053 5.906724349 22.978979452 0 0 0  
Cu 8.951889887 8.121746364 22.978979452 0 0 0  
Cu 7.673046721 10.336769913 22.978979452 0 0 0  
Cu 6.394202020 12.551793462 22.978979452 0 0 0  
N 0.071763587 2.982193098 28.142137216  
O 2.443508518 4.234700834 29.257217266  
H 3.186402301 3.713793703 29.618542736  
Cu 1.287189096 0.737671777 25.029176927  
Cu 0.002951052 2.953905286 25.033281282  
Cu -1.272802414 5.186213006 25.040140636  
Cu -2.557739570 7.387715241 25.037196880  
Cu -3.841829933 9.594401027 25.020014706  
Cu -5.114559110 11.797833993 25.017676151  
Cu 3.841685039 0.730970823 25.014037662  
Cu 2.555420544 2.965485685 25.056574805  
Cu 1.286845141 5.182155203 25.087282135  
Cu -0.000814901 7.380822466 25.065001524  
Cu -1.286356232 9.597902032 25.023461354  
Cu -2.560406491 11.806610133 25.026657703  
Cu 6.394737807 0.733837236 25.020510492  
Cu 5.122645832 2.974675036 25.043713303  
Cu 3.833812027 5.168351819 25.119322965  
Cu 2.566363621 7.376119706 25.072272880  
Cu 1.276999851 9.599991330 25.019859193  
Cu -0.002071219 11.811776315 25.026659409  
Cu 8.952305131 0.736951298 25.025512802  
Cu 7.672988127 2.947238767 25.007591295

Cu 6.373793583 5.164588895 25.034910397  
Cu 5.100003868 7.372576256 25.039065005  
Cu 3.836268897 9.601062280 25.010323105  
Cu 2.559994557 11.812886076 25.027091256  
Cu 11.510011237 0.736539251 25.027935489  
Cu 10.228790938 2.950685200 25.015938253  
Cu 8.954778146 5.170550294 24.995185943  
Cu 7.670097322 7.382328647 24.996386635  
Cu 6.396995230 9.602846569 24.997521995  
Cu 5.116796651 11.811115638 25.021508385  
Cu 14.070710821 0.751446064 25.056549292  
Cu 12.805198237 2.937742668 25.041638694  
Cu 11.508285495 5.164952559 25.007821493  
Cu 10.226435821 7.386406231 25.006444225  
Cu 8.952580986 9.598740507 25.007508750  
Cu 7.672778967 11.817997702 25.021577499  
Cu 0.000929611 -0.062631166 27.074084980  
Cu -1.338480950 2.180919557 27.224587270  
Cu -2.622428880 4.435156636 27.030687454  
Cu -3.877774663 6.643616894 27.046177584  
Cu -5.127002082 8.851987641 27.062319362  
Cu -6.393169145 11.052606847 27.069956242  
Cu 2.590314054 -0.045496976 27.048967942  
Cu 1.339774384 2.105706217 27.119430832  
Cu -0.056916088 4.500066973 27.098660604  
Cu -1.330317771 6.682784784 27.114546774  
Cu -2.581742557 8.879945752 27.066311175  
Cu -3.839856714 11.059122969 27.071988323  
Cu 5.134341781 -0.019507998 27.071888782  
Cu 3.876982888 2.155950998 27.027731927  
Cu 2.583264332 4.427348119 27.153852068  
Cu 1.260592266 6.707659885 27.118377685  
Cu -0.015028472 8.923132620 27.055574710  
Cu -1.286810142 11.082037172 27.078772413  
Cu 7.679212904 -0.003099409 27.075210665  
Cu 6.430726000 2.186910818 27.055658362  
Cu 5.174404201 4.397363277 27.159146313  
Cu 3.873597598 6.701224443 27.159831823  
Cu 2.563701844 8.924031574 27.046307953  
Cu 1.279155487 11.093537361 27.077246177  
Cu 10.222647188 -0.001684820 27.072196474  
Cu 8.953640692 2.216666997 27.068781804  
Cu 7.707301679 4.427162951 27.010732869  
Cu 6.443682063 6.664201214 27.037900552  
Cu 5.137311170 8.897799122 27.021097155  
Cu 3.845915467 11.084781443 27.074568041  
Cu 12.770950618 -0.010464352 27.064224168  
Cu 11.488173764 2.203966585 27.065930040  
Cu 10.215044474 4.424712020 27.063535164  
Cu 8.949073563 6.639761676 27.043756414  
Cu 7.673883573 8.865382367 27.025805625  
Cu 6.396248286 11.068280171 27.071657013  
O 0.148761553 5.303536458 30.959418322  
S -0.019034396 6.538700123 30.217769672  
C -0.104666754 7.935345573 31.495089041  
C -1.231121106 7.798750099 32.571805848  
O -1.006854092 6.640182165 33.293938167  
C -1.641975061 6.433503644 34.513074397  
F -1.049309637 7.130894222 35.504862843  
F -2.950928595 6.770771081 34.481936121  
F -1.530111536 5.125459568 34.780641939  
F -1.217815462 8.908242780 33.364371713  
F -2.450181161 7.768020956 31.951633354  
F -0.306891538 9.105115419 30.832230818  
F 1.096083548 7.990504363 32.133444203  
O -1.310445786 6.672835621 29.468302524

|   |              |             |              |
|---|--------------|-------------|--------------|
| O | 1.140081761  | 6.983676134 | 29.384640715 |
| O | 3.949005753  | 6.796823975 | 29.368783832 |
| H | 3.003368085  | 6.808403341 | 29.651271925 |
| H | 4.853727872  | 5.334020584 | 29.562144415 |
| H | 4.410088699  | 7.634159896 | 29.688523948 |
| O | 5.396250821  | 8.904068998 | 30.172105870 |
| H | 5.365820060  | 9.609884276 | 29.489644897 |
| H | 6.341452133  | 8.637863109 | 30.204452513 |
| O | 11.795211172 | 5.260115856 | 30.119407453 |
| O | 9.600087133  | 5.873206557 | 30.987914251 |
| O | 8.292117984  | 7.980340576 | 30.052849730 |
| O | 8.037719223  | 3.890034382 | 30.138938183 |
| H | 10.632445952 | 5.690589514 | 30.573928582 |
| H | 12.586776924 | 5.861806294 | 30.023573449 |
| H | 9.165981917  | 6.721551307 | 30.635920633 |
| H | 9.009946589  | 5.097080799 | 30.716071607 |
| H | 8.832129237  | 8.791798322 | 29.955328766 |
| H | 8.144931046  | 7.719279673 | 29.096249559 |
| H | 11.657363065 | 4.897380754 | 29.205324018 |
| H | 8.303229786  | 3.721552169 | 29.189188372 |
| O | 5.192634984  | 4.414280350 | 29.372599338 |
| H | 6.115605258  | 4.338807244 | 29.700794756 |
| H | 1.603618158  | 3.722824489 | 29.357512034 |
| H | 8.085139237  | 3.013450932 | 30.566048854 |

End final coordinates

NB: We accounted for water loss before moving to the next protonation step.

### THIRD PROTONATION ON CU111 Surfaces

*N-Eigen-Cu111*

CELL\_PARAMETERS (angstrom)

|              |              |              |
|--------------|--------------|--------------|
| 15.346059799 | 0.000000000  | 0.000000000  |
| -7.673035145 | 13.290086719 | 0.000000000  |
| 0.000000000  | 0.000000000  | 50.000000000 |

ATOMIC\_POSITIONS (angstrom)

|    |              |              |              |   |   |   |
|----|--------------|--------------|--------------|---|---|---|
| Cu | -0.000007673 | 1.476686458  | 22.979062321 | 0 | 0 | 0 |
| Cu | -1.278853909 | 3.691714611  | 22.979062321 | 0 | 0 | 0 |
| Cu | -2.557704748 | 5.906745834  | 22.979062321 | 0 | 0 | 0 |
| Cu | -3.836550983 | 8.121773987  | 22.979062321 | 0 | 0 | 0 |
| Cu | -5.115401823 | 10.336806743 | 22.979062321 | 0 | 0 | 0 |
| Cu | -6.394248058 | 12.551839500 | 22.979062321 | 0 | 0 | 0 |
| Cu | 2.557686333  | 1.476686458  | 22.979062321 | 0 | 0 | 0 |
| Cu | 1.278835493  | 3.691714611  | 22.979062321 | 0 | 0 | 0 |
| Cu | -0.000009208 | 5.906745834  | 22.979062321 | 0 | 0 | 0 |
| Cu | -1.278855443 | 8.121773987  | 22.979062321 | 0 | 0 | 0 |
| Cu | -2.557706282 | 10.336806743 | 22.979062321 | 0 | 0 | 0 |
| Cu | -3.836552518 | 12.551839500 | 22.979062321 | 0 | 0 | 0 |
| Cu | 5.115381873  | 1.476686458  | 22.979062321 | 0 | 0 | 0 |
| Cu | 3.836531033  | 3.691714611  | 22.979062321 | 0 | 0 | 0 |
| Cu | 2.557684798  | 5.906745834  | 22.979062321 | 0 | 0 | 0 |
| Cu | 1.278833959  | 8.121773987  | 22.979062321 | 0 | 0 | 0 |
| Cu | -0.000012277 | 10.336806743 | 22.979062321 | 0 | 0 | 0 |
| Cu | -1.278858512 | 12.551839500 | 22.979062321 | 0 | 0 | 0 |
| Cu | 7.673075878  | 1.476686458  | 22.979062321 | 0 | 0 | 0 |
| Cu | 6.394226574  | 3.691714611  | 22.979062321 | 0 | 0 | 0 |
| Cu | 5.115380338  | 5.906745834  | 22.979062321 | 0 | 0 | 0 |
| Cu | 3.836529499  | 8.121773987  | 22.979062321 | 0 | 0 | 0 |
| Cu | 2.557683263  | 10.336806743 | 22.979062321 | 0 | 0 | 0 |
| Cu | 1.278832424  | 12.551839500 | 22.979062321 | 0 | 0 | 0 |
| Cu | 10.230771419 | 1.476686458  | 22.979062321 | 0 | 0 | 0 |
| Cu | 8.951920579  | 3.691714611  | 22.979062321 | 0 | 0 | 0 |
| Cu | 7.673075878  | 5.906745834  | 22.979062321 | 0 | 0 | 0 |
| Cu | 6.394225039  | 8.121773987  | 22.979062321 | 0 | 0 | 0 |

|    |              |              |               |   |   |   |
|----|--------------|--------------|---------------|---|---|---|
| Cu | 5.115378804  | 10.336806743 | 22.979062321  | 0 | 0 | 0 |
| Cu | 3.836527964  | 12.551839500 | 22.979062321  | 0 | 0 | 0 |
| Cu | 12.788466959 | 1.476686458  | 22.979062321  | 0 | 0 | 0 |
| Cu | 11.509616120 | 3.691714611  | 22.979062321  | 0 | 0 | 0 |
| Cu | 10.230769884 | 5.906745834  | 22.979062321  | 0 | 0 | 0 |
| Cu | 8.951920579  | 8.121773987  | 22.979062321  | 0 | 0 | 0 |
| Cu | 7.673074344  | 10.336806743 | 22.979062321  | 0 | 0 | 0 |
| Cu | 6.394223504  | 12.551839500 | 22.979062321  | 0 | 0 | 0 |
| N  | 2.667479403  | 2.998028321  | 28.168601155  |   |   |   |
| Cu | 1.286147981  | 0.757389139  | 25.057946651  |   |   |   |
| Cu | 0.021257642  | 2.948752625  | 25.059135833  |   |   |   |
| Cu | -1.270375017 | 5.169833299  | 25.020530760  |   |   |   |
| Cu | -2.554720160 | 7.386206113  | 25.017125012  |   |   |   |
| Cu | -3.835587433 | 9.596088836  | 25.024048804  |   |   |   |
| Cu | -5.110828952 | 11.819626816 | 25.024658611  |   |   |   |
| Cu | 3.848537172  | 0.738588654  | 25.030880634  |   |   |   |
| Cu | 2.565577501  | 2.955929669  | 25.041852524  |   |   |   |
| Cu | 1.286717076  | 5.175143048  | 25.030301032  |   |   |   |
| Cu | -0.007005991 | 7.394281615  | 25.018130627  |   |   |   |
| Cu | -1.279906723 | 9.597360362  | 25.026605038  |   |   |   |
| Cu | -2.552646297 | 11.799796173 | 25.0214355105 |   |   |   |
| Cu | 6.406706011  | 0.730431956  | 25.020731619  |   |   |   |
| Cu | 5.116061824  | 2.958019607  | 25.057538929  |   |   |   |
| Cu | 3.839894477  | 5.179574984  | 25.091038212  |   |   |   |
| Cu | 2.572597546  | 7.388667106  | 25.046567059  |   |   |   |
| Cu | 1.275881698  | 9.602418410  | 25.023142206  |   |   |   |
| Cu | 0.004913367  | 11.811148034 | 25.029407802  |   |   |   |
| Cu | 8.962005463  | 0.740766625  | 25.029636553  |   |   |   |
| Cu | 7.686546280  | 2.953877819  | 25.013808369  |   |   |   |
| Cu | 6.376651717  | 5.157822986  | 25.042723382  |   |   |   |
| Cu | 5.112497926  | 7.381257194  | 25.038292861  |   |   |   |
| Cu | 3.837288057  | 9.608671774  | 25.018021441  |   |   |   |
| Cu | 2.563937453  | 11.817766841 | 25.030080842  |   |   |   |
| Cu | 11.515053697 | 0.744637292  | 25.031861597  |   |   |   |
| Cu | 10.237538404 | 2.954521257  | 25.020698023  |   |   |   |
| Cu | 8.959543425  | 5.175076179  | 25.004666072  |   |   |   |
| Cu | 7.678008057  | 7.384164153  | 24.999464244  |   |   |   |
| Cu | 6.402217719  | 9.605362682  | 25.003467279  |   |   |   |
| Cu | 5.121138965  | 11.817683624 | 25.028328243  |   |   |   |
| Cu | 14.070596120 | 0.740472780  | 25.029946573  |   |   |   |
| Cu | 12.791657065 | 2.956383401  | 25.022607753  |   |   |   |
| Cu | 11.513892218 | 5.172540989  | 25.010789849  |   |   |   |
| Cu | 10.235638954 | 7.389045785  | 25.012276099  |   |   |   |
| Cu | 8.962566480  | 9.603563072  | 25.010065467  |   |   |   |
| Cu | 7.678589481  | 11.813665294 | 25.025969885  |   |   |   |
| Cu | -0.008336860 | -0.001794456 | 27.065107211  |   |   |   |
| Cu | -1.284622963 | 2.210303589  | 27.066762586  |   |   |   |
| Cu | -2.563071370 | 4.437868879  | 27.056712493  |   |   |   |
| Cu | -3.837424802 | 6.654396778  | 27.051928315  |   |   |   |
| Cu | -5.118700193 | 8.855560322  | 27.073810957  |   |   |   |
| Cu | -6.391046994 | 11.064649149 | 27.071501794  |   |   |   |
| Cu | 2.566223412  | -0.056840076 | 27.076276194  |   |   |   |
| Cu | 1.251827709  | 2.191176453  | 27.234482394  |   |   |   |
| Cu | -0.049695119 | 4.463139177  | 27.076773398  |   |   |   |
| Cu | -1.293325302 | 6.657693912  | 27.075824635  |   |   |   |
| Cu | -2.560156037 | 8.858029376  | 27.071780711  |   |   |   |
| Cu | -3.828809095 | 11.060284969 | 27.071638706  |   |   |   |
| Cu | 5.158279912  | -0.032370540 | 27.051157925  |   |   |   |
| Cu | 3.917688043  | 2.123457997  | 27.119215916  |   |   |   |
| Cu | 2.500826503  | 4.520459156  | 27.121384429  |   |   |   |
| Cu | 1.257893019  | 6.688515360  | 27.043825000  |   |   |   |
| Cu | 0.000356003  | 8.870358993  | 27.072587236  |   |   |   |
| Cu | -1.268017390 | 11.066794887 | 27.071981480  |   |   |   |
| Cu | 7.702563867  | -0.007705005 | 27.078873376  |   |   |   |
| Cu | 6.451658535  | 2.186511328  | 27.044630709  |   |   |   |
| Cu | 5.186688792  | 4.445094818  | 27.153269776  |   |   |   |

Cu 3.844457906 6.707257365 27.138477231  
 Cu 2.554548466 8.905286667 27.061788063  
 Cu 1.287757646 11.083771273 27.077446427  
 Cu 10.244790870 0.007837628 27.078233289  
 Cu 8.972736411 2.223158061 27.078323704  
 Cu 7.714708818 4.437109215 27.032678044  
 Cu 6.437949003 6.668273633 27.042995642  
 Cu 5.135953858 8.895209672 27.023292779  
 Cu 3.850168098 11.083518622 27.084417950  
 Cu 12.787583154 0.000511551 27.077830559  
 Cu 11.516714992 2.228971076 27.079807927  
 Cu 10.239469352 4.437006371 27.051525017  
 Cu 8.966488859 6.652235415 27.047078766  
 Cu 7.680907824 8.871363594 27.027451215  
 Cu 6.403321271 11.079060675 27.074108743  
 O 3.906166029 6.850941144 29.466450587  
 H 2.996547894 7.102057509 29.708534143  
 H 4.463016965 5.228432356 29.592404516  
 H 4.515475918 7.616639041 29.741045405  
 O 5.534851992 8.820865855 30.166639396  
 H 5.481369927 9.515817015 29.473248565  
 H 6.483109733 8.550855387 30.163152487  
 O 11.388316824 5.020732417 30.098606893  
 O 8.963350764 5.547085533 30.807801305  
 O 8.345503900 8.032544746 30.092917869  
 O 7.382489280 3.764295272 30.134342130  
 H 9.921829968 5.327447079 30.483720418  
 H 11.760251791 5.727435515 29.522524475  
 H 8.723576519 6.483539253 30.515471029  
 H 8.240515358 4.803463369 30.467313278  
 H 8.934000148 8.736055376 30.427344062  
 H 8.468219367 8.065138031 29.097342625  
 H 11.440494037 4.236114046 29.505018333  
 O 4.841791284 4.322934289 29.421182451  
 H 6.418709472 3.978099350 29.953788800  
 H 7.691201195 3.321935777 29.306749141  
 H 4.052989845 3.724142028 29.269496602  
 End final coordinates

*N-Eigen-Cu111-Nafion*

CELL\_PARAMETERS (angstrom)

15.346059799 0.000000000 0.000000000  
 -7.673035145 13.290086719 0.000000000  
 0.000000000 0.000000000 50.000000000

ATOMIC\_POSITIONS (angstrom)

Cu -0.000007673 1.476683389 22.979020887 0 0 0  
 Cu -1.278852374 3.691708473 22.979020887 0 0 0  
 Cu -2.557700144 5.906735091 22.979020887 0 0 0  
 Cu -3.836544845 8.121760175 22.979020887 0 0 0  
 Cu -5.115392615 10.336788328 22.979020887 0 0 0  
 Cu -6.394237316 12.551816481 22.979020887 0 0 0  
 Cu 2.557681729 1.476683389 22.979020887 0 0 0  
 Cu 1.278833959 3.691708473 22.979020887 0 0 0  
 Cu -0.000009208 5.906735091 22.979020887 0 0 0  
 Cu -1.278853909 8.121760175 22.979020887 0 0 0  
 Cu -2.557701679 10.336788328 22.979020887 0 0 0  
 Cu -3.836546380 12.551816481 22.979020887 0 0 0  
 Cu 5.115372665 1.476683389 22.979020887 0 0 0  
 Cu 3.836524895 3.691708473 22.979020887 0 0 0  
 Cu 2.557680194 5.906735091 22.979020887 0 0 0  
 Cu 1.278832424 8.121760175 22.979020887 0 0 0  
 Cu -0.000012277 10.336788328 22.979020887 0 0 0  
 Cu -1.278856978 12.551816481 22.979020887 0 0 0  
 Cu 7.673062067 1.476683389 22.979020887 0 0 0  
 Cu 6.394215831 3.691708473 22.979020887 0 0 0

Cu 5.115371131 5.906735091 22.979020887 0 0 0  
 Cu 3.836523360 8.121760175 22.979020887 0 0 0  
 Cu 2.557678660 10.336788328 22.979020887 0 0 0  
 Cu 1.278830889 12.551816481 22.979020887 0 0 0  
 Cu 10.230753003 1.476683389 22.979020887 0 0 0  
 Cu 8.951905233 3.691708473 22.979020887 0 0 0  
 Cu 7.673062067 5.906735091 22.979020887 0 0 0  
 Cu 6.394214297 8.121760175 22.979020887 0 0 0  
 Cu 5.115369596 10.336788328 22.979020887 0 0 0  
 Cu 3.836521826 12.551816481 22.979020887 0 0 0  
 Cu 12.788443940 1.476683389 22.979020887 0 0 0  
 Cu 11.509596170 3.691708473 22.979020887 0 0 0  
 Cu 10.230751469 5.906735091 22.979020887 0 0 0  
 Cu 8.951905233 8.121760175 22.979020887 0 0 0  
 Cu 7.673060532 10.336788328 22.979020887 0 0 0  
 Cu 6.394212762 12.551816481 22.979020887 0 0 0  
 N 1.307795047 3.713500588 28.124945013  
 Cu 1.282596242 0.752077983 25.045730685  
 Cu 0.004516114 2.955440726 25.050506050  
 Cu -1.265395363 5.177138409 25.053988567  
 Cu -2.5474440957 7.384468748 25.040478058  
 Cu -3.833308295 9.599408749 25.023929439  
 Cu -5.111182282 11.808684866 25.018096970  
 Cu 3.835904279 0.741974616 25.028788268  
 Cu 2.559248480 2.957944581 25.055214492  
 Cu 1.283813705 5.183351169 25.079459018  
 Cu 0.000569960 7.373591606 25.076474442  
 Cu -1.278674859 9.600481673 25.027014094  
 Cu -2.555136812 11.816259386 25.028499507  
 Cu 6.400260775 0.740317200 25.029787616  
 Cu 5.120718438 2.958304546 25.021235745  
 Cu 3.833294910 5.169129419 25.031797654  
 Cu 2.551332248 7.381899896 25.049879894  
 Cu 1.281047282 9.603637962 25.028374616  
 Cu 0.001843280 11.815718109 25.030263124  
 Cu 8.953777308 0.740351558 25.030229538  
 Cu 7.677627147 2.952192580 25.015734942  
 Cu 6.408023612 5.182463747 24.999756884  
 Cu 5.127780919 7.391673982 25.004013291  
 Cu 3.837796165 9.604488615 25.014168826  
 Cu 2.560499089 11.814320336 25.030802586  
 Cu 11.507712319 0.737307325 25.030466361  
 Cu 10.232214765 2.950787140 25.021599677  
 Cu 8.960890442 5.174396988 25.004604358  
 Cu 7.680868445 7.390919163 25.006843648  
 Cu 6.400383018 9.607148101 25.006932287  
 Cu 5.117058670 11.815044048 25.027997409  
 Cu 14.074081419 0.735706623 25.029147359  
 Cu 12.792636667 2.951105473 25.018012087  
 Cu 11.502228693 5.175641252 25.003914824  
 Cu 10.234407277 7.393807179 25.012201003  
 Cu 8.960274267 9.603115537 25.014972797  
 Cu 7.676598541 11.807775794 25.019897559  
 Cu -0.000280322 -0.028891105 27.055888116  
 Cu -1.319133360 2.189196244 27.073610452  
 Cu -2.595725753 4.423143327 27.016173312  
 Cu -3.866571637 6.647155715 27.049458975  
 Cu -5.116831630 8.861614784 27.074337114  
 Cu -6.389003155 11.062888529 27.069711499  
 Cu 2.569985774 -0.025185418 27.055019657  
 Cu 1.287583153 2.134054219 27.171524140  
 Cu -0.068066808 4.437297478 27.132652508  
 Cu -1.316463961 6.658516819 27.131977767  
 Cu -2.566507391 8.877125579 27.070475450  
 Cu -3.831934719 11.074294599 27.072548199  
 Cu 5.127718785 0.005014317 27.075075933

Cu 3.891690687 2.203669101 27.075720700  
 Cu 2.667489333 4.474430847 27.150438111  
 Cu 1.304837057 6.696095755 27.159068649  
 Cu 0.001238870 8.899095647 27.064233544  
 Cu -1.278574193 11.084575581 27.076846297  
 Cu 7.678783512 0.008312785 27.079368103  
 Cu 6.413045034 2.230548691 27.082928697  
 Cu 5.169704565 4.454911781 27.025915826  
 Cu 3.892842636 6.672396719 27.042499633  
 Cu 2.581973825 8.887504649 27.067923401  
 Cu 1.285161775 11.087104618 27.081541806  
 Cu 10.230467033 0.004682633 27.076749208  
 Cu 8.949461913 2.229014219 27.077843416  
 Cu 7.690879159 4.444998998 27.027748047  
 Cu 6.425878964 6.665588032 27.062629085  
 Cu 5.129995330 8.873434961 27.032338877  
 Cu 3.847224733 11.076049379 27.080117998  
 Cu 12.785213744 -0.004718239 27.073640085  
 Cu 11.498996850 2.217153402 27.078729296  
 Cu 10.221113388 4.431770930 27.056981109  
 Cu 8.954626109 6.649124445 27.050703393  
 Cu 7.676309345 8.871029904 27.040448736  
 Cu 6.396343612 11.068287750 27.073272446  
 O 0.142453612 5.233466306 31.115646177  
 S -0.003464784 6.427121116 30.308662537  
 C -0.129864769 7.893380442 31.505595489  
 C -1.267212372 7.800126112 32.575015194  
 O -1.029177772 6.694739788 33.370074872  
 C -1.696546284 6.534879733 34.580126825  
 F -1.144868635 7.291058357 35.551561051  
 F -3.009632522 6.846863489 34.496452500  
 F -1.570959259 5.243740928 34.912793558  
 F -1.290166764 8.956076129 33.297704059  
 F -2.476671792 7.706016988 31.938959294  
 F -0.342366751 9.021176687 30.775997266  
 F 1.062930198 8.006144527 32.151276829  
 O -1.249618478 6.540580156 29.493934552  
 O 1.204649740 6.827156496 29.502122509  
 O 3.580174253 6.518444052 30.607715496  
 H 2.679734741 6.620652874 30.147998738  
 H 4.032452184 5.599543986 30.396113218  
 H 4.231468747 7.315061943 30.426551970  
 O 5.207639733 8.455867604 30.314524026  
 H 5.067570892 8.938613340 29.466723724  
 H 6.162428354 8.210286871 30.302850605  
 O 11.731342872 5.189576826 30.118808379  
 O 9.472983162 5.719807518 30.915417803  
 O 8.122054877 7.845573309 30.097614971  
 O 7.708725502 3.847734582 30.210994591  
 H 10.505889499 5.564316861 30.532779152  
 H 12.516899669 5.796095948 30.079991735  
 H 9.039049691 6.580310548 30.595587921  
 H 8.857527675 4.959193798 30.648090812  
 H 8.590944558 8.702249673 30.158322090  
 H 8.060580130 7.700012468 29.106296931  
 H 11.661719403 4.831369300 29.196296996  
 H 7.820691741 3.668772928 29.233997052  
 O 4.679818695 4.262996315 30.210827525  
 H 5.659698621 4.233223166 30.130728656  
 H 4.342689621 3.863903389 29.374991689  
 H 7.803341373 2.970961722 30.629804072  
 End final coordinates

NH-Cu11

CELL\_PARAMETERS (angstrom)  
 15.346059799 0.000000000 0.000000000

-7.673035145 13.290086719 0.000000000  
 0.000000000 0.000000000 50.000000000

ATOMIC\_POSITIONS (angstrom)

Cu -0.000007673 1.476683389 22.979020887 0 0 0  
 Cu -1.278852374 3.691708473 22.979020887 0 0 0  
 Cu -2.557700144 5.906735091 22.979020887 0 0 0  
 Cu -3.836544845 8.121760175 22.979020887 0 0 0  
 Cu -5.115392615 10.336788328 22.979020887 0 0 0  
 Cu -6.394237316 12.551816481 22.979020887 0 0 0  
 Cu 2.557681729 1.476683389 22.979020887 0 0 0  
 Cu 1.278833959 3.691708473 22.979020887 0 0 0  
 Cu -0.000009208 5.906735091 22.979020887 0 0 0  
 Cu -1.278853909 8.121760175 22.979020887 0 0 0  
 Cu -2.557701679 10.336788328 22.979020887 0 0 0  
 Cu -3.836546380 12.551816481 22.979020887 0 0 0  
 Cu 5.115372665 1.476683389 22.979020887 0 0 0  
 Cu 3.836524895 3.691708473 22.979020887 0 0 0  
 Cu 2.557680194 5.906735091 22.979020887 0 0 0  
 Cu 1.278832424 8.121760175 22.979020887 0 0 0  
 Cu -0.000012277 10.336788328 22.979020887 0 0 0  
 Cu -1.278856978 12.551816481 22.979020887 0 0 0  
 Cu 7.673062067 1.476683389 22.979020887 0 0 0  
 Cu 6.394215831 3.691708473 22.979020887 0 0 0  
 Cu 5.115371131 5.906735091 22.979020887 0 0 0  
 Cu 3.836523360 8.121760175 22.979020887 0 0 0  
 Cu 2.557678660 10.336788328 22.979020887 0 0 0  
 Cu 1.278830889 12.551816481 22.979020887 0 0 0  
 Cu 10.230753003 1.476683389 22.979020887 0 0 0  
 Cu 8.951905233 3.691708473 22.979020887 0 0 0  
 Cu 7.673062067 5.906735091 22.979020887 0 0 0  
 Cu 6.394214297 8.121760175 22.979020887 0 0 0  
 Cu 5.115369596 10.336788328 22.979020887 0 0 0  
 Cu 3.836521826 12.551816481 22.979020887 0 0 0  
 Cu 12.788443940 1.476683389 22.979020887 0 0 0  
 Cu 11.509596170 3.691708473 22.979020887 0 0 0  
 Cu 10.230751469 5.906735091 22.979020887 0 0 0  
 Cu 8.951905233 8.121760175 22.979020887 0 0 0  
 Cu 7.673060532 10.336788328 22.979020887 0 0 0  
 Cu 6.394212762 12.551816481 22.979020887 0 0 0  
 N 2.549338832 2.948741460 28.234088490  
 H 2.581742567 2.967333411 29.257043580  
 Cu 1.281339971 0.747846236 25.053053497  
 Cu 0.014343419 2.940849797 25.050679259  
 Cu -1.269848757 5.164065904 25.016462303  
 Cu -2.558766120 7.381235506 25.018729450  
 Cu -3.837269311 9.591846814 25.023244904  
 Cu -5.113017569 11.813740052 25.022964608  
 Cu 3.839209968 0.745486947 25.046980336  
 Cu 2.560117787 2.948020715 25.028564265  
 Cu 1.292346211 5.158352376 25.040195184  
 Cu -0.008888327 7.384591664 25.016473693  
 Cu -1.282576039 9.591337680 25.025517049  
 Cu -2.555871285 11.797181456 25.018666053  
 Cu 6.399938897 0.724233524 25.015730650  
 Cu 5.101567116 2.956836599 25.075155251  
 Cu 3.840637500 5.162903158 25.107529284  
 Cu 2.570154937 7.375246176 25.045222952  
 Cu 1.271564759 9.590987047 25.022574315  
 Cu 0.000753099 11.802232959 25.026524767  
 Cu 8.954812208 0.728236938 25.017302015  
 Cu 7.680843831 2.963084410 25.045432661  
 Cu 6.386211402 5.135258877 25.087327319  
 Cu 5.108742887 7.367301130 25.034671172  
 Cu 3.832671281 9.596459627 25.016856429  
 Cu 2.558102441 11.806054923 25.025472727

Cu 11.509132982 0.734817138 25.028192116  
 Cu 10.233428542 2.949671368 25.017270061  
 Cu 8.936921149 5.159032669 25.049357875  
 Cu 7.675947979 7.375094295 25.001822403  
 Cu 6.397837667 9.597479761 25.000076277  
 Cu 5.115245051 11.808371139 25.025489498  
 Cu 14.065330490 0.730821281 25.026921957  
 Cu 12.783872031 2.949330999 25.014314139  
 Cu 11.506695516 5.170350497 25.008502825  
 Cu 10.230917173 7.381144714 25.013673876  
 Cu 8.960518166 9.596736779 25.007877712  
 Cu 7.674841953 11.802757962 25.018878786  
 Cu -0.029102018 -0.036557391 27.059717769  
 Cu -1.316257156 2.194875680 27.061010159  
 Cu -2.557284236 4.426424101 27.041261681  
 Cu -3.840387231 6.646492451 27.055056269  
 Cu -5.118907950 8.853658139 27.073715721  
 Cu -6.396519722 11.052381152 27.070201382  
 Cu 2.553406541 -0.066957932 27.074637413  
 Cu 1.182050481 2.146575155 27.190560403  
 Cu -0.051731400 4.444427259 27.073667279  
 Cu -1.297156360 6.643018985 27.074515081  
 Cu -2.563087119 8.849094335 27.072166870  
 Cu -3.834943932 11.051829679 27.072008811  
 Cu 5.142145506 -0.045710512 27.055813388  
 Cu 3.891162860 2.123638700 27.163461494  
 Cu 2.498781319 4.504986627 27.147280693  
 Cu 1.249100894 6.674993779 27.048345693  
 Cu -0.008824058 8.855698851 27.072561251  
 Cu -1.273971130 11.053526191 27.072006290  
 Cu 7.695095974 -0.026438779 27.074584047  
 Cu 6.428441371 2.149367488 27.034610266  
 Cu 5.143765676 4.420443315 27.181346435  
 Cu 3.833859956 6.704368950 27.145567691  
 Cu 2.544286142 8.889515656 27.060915059  
 Cu 1.279582688 11.066659185 27.076070308  
 Cu 10.238720908 -0.016886289 27.075843651  
 Cu 8.985293765 2.176426560 27.048278367  
 Cu 7.730118102 4.417897359 27.171379027  
 Cu 6.432003719 6.676360800 27.035262592  
 Cu 5.128965873 8.884284733 27.021218854  
 Cu 3.840328916 11.067271140 27.079915328  
 Cu 12.775660525 -0.016736267 27.075907782  
 Cu 11.507836303 2.210909372 27.077195791  
 Cu 10.266515708 4.421461302 27.051154627  
 Cu 8.968446729 6.666246210 27.057749359  
 Cu 7.676839112 8.867427422 27.023696169  
 Cu 6.391509947 11.061875996 27.069548651  
 O 3.960151178 6.881147519 29.454361450  
 H 3.051239287 7.043594408 29.763415946  
 H 4.753143382 5.313698674 29.544594204  
 H 4.518780885 7.689466325 29.718013418  
 O 5.473683587 8.936000731 30.145416191  
 H 5.403457563 9.641493208 29.465750638  
 H 6.437066280 8.711164129 30.169916157  
 O 11.839208742 5.075644902 30.113016722  
 O 9.261458395 5.729086157 30.758728842  
 O 8.284181084 8.327136236 30.162136597  
 O 7.786097391 4.185853628 29.394116321  
 H 10.221737889 5.608743383 30.522927486  
 H 12.291595926 5.698885699 29.504273034  
 H 9.025557590 6.674298565 30.612425793  
 H 8.416961980 4.823182865 29.934127246  
 H 8.785146464 9.105900752 30.468527663  
 H 8.458784788 8.303187985 29.182195981  
 H 11.759408764 4.271293508 29.556329716

O 5.133622686 4.438063273 29.278870555  
 H 6.095599005 4.415185635 29.533553232  
 H 8.085594280 3.271643280 29.555250185  
 End final coordinates

NH-Cu111-Nafion

CELL\_PARAMETERS (angstrom)  
 15.346059799 0.000000000 0.000000000  
 -7.673035145 13.290086719 0.000000000  
 0.000000000 0.000000000 50.000000000

ATOMIC\_POSITIONS (angstrom)

Cu -0.000007673 1.476683389 22.979020887 0 0 0  
 Cu -1.278852374 3.691708473 22.979020887 0 0 0  
 Cu -2.557700144 5.906735091 22.979020887 0 0 0  
 Cu -3.836544845 8.121760175 22.979020887 0 0 0  
 Cu -5.115392615 10.336788328 22.979020887 0 0 0  
 Cu -6.394237316 12.551816481 22.979020887 0 0 0  
 Cu 2.557681729 1.476683389 22.979020887 0 0 0  
 Cu 1.278833959 3.691708473 22.979020887 0 0 0  
 Cu -0.000009208 5.906735091 22.979020887 0 0 0  
 Cu -1.278853909 8.121760175 22.979020887 0 0 0  
 Cu -2.557701679 10.336788328 22.979020887 0 0 0  
 Cu -3.836546380 12.551816481 22.979020887 0 0 0  
 Cu 5.115372665 1.476683389 22.979020887 0 0 0  
 Cu 3.836524895 3.691708473 22.979020887 0 0 0  
 Cu 2.557680194 5.906735091 22.979020887 0 0 0  
 Cu 1.278832424 8.121760175 22.979020887 0 0 0  
 Cu -0.000012277 10.336788328 22.979020887 0 0 0  
 Cu -1.278856978 12.551816481 22.979020887 0 0 0  
 Cu 7.673062067 1.476683389 22.979020887 0 0 0  
 Cu 6.394215831 3.691708473 22.979020887 0 0 0  
 Cu 5.115371131 5.906735091 22.979020887 0 0 0  
 Cu 3.836523360 8.121760175 22.979020887 0 0 0  
 Cu 2.557678660 10.336788328 22.979020887 0 0 0  
 Cu 1.278830889 12.551816481 22.979020887 0 0 0  
 Cu 10.230753003 1.476683389 22.979020887 0 0 0  
 Cu 8.951905233 3.691708473 22.979020887 0 0 0  
 Cu 7.673062067 5.906735091 22.979020887 0 0 0  
 Cu 6.394214297 8.121760175 22.979020887 0 0 0  
 Cu 5.115369596 10.336788328 22.979020887 0 0 0  
 Cu 3.836521826 12.551816481 22.979020887 0 0 0  
 Cu 12.788443940 1.476683389 22.979020887 0 0 0  
 Cu 11.509596170 3.691708473 22.979020887 0 0 0  
 Cu 10.230751469 5.906735091 22.979020887 0 0 0  
 Cu 8.951905233 8.121760175 22.979020887 0 0 0  
 Cu 7.673060532 10.336788328 22.979020887 0 0 0  
 Cu 6.394212762 12.551816481 22.979020887 0 0 0  
 N 1.254178219 3.701714353 28.242590581  
 H 1.227524364 3.735454439 29.266962630  
 Cu 1.275298443 0.762090767 25.058221141  
 Cu 0.002100868 2.955409058 25.042467963  
 Cu -1.267704256 5.169873695 25.061348373  
 Cu -2.559604660 7.381266563 25.036948927  
 Cu -3.844228442 9.596646383 25.019699696  
 Cu -5.120269676 11.806680771 25.017679282  
 Cu 3.828821951 0.734229177 25.023043806  
 Cu 2.547234418 2.960976561 25.043444775  
 Cu 1.273081139 5.178879367 25.062102399  
 Cu -0.013503676 7.376161954 25.063850532  
 Cu -1.290437215 9.600157841 25.021622813  
 Cu -2.564463363 11.810833038 25.024226476  
 Cu 6.390695677 0.731924166 25.021247184  
 Cu 5.108617784 2.972060233 25.055957358  
 Cu 3.829061087 5.166233489 25.115155308  
 Cu 2.556199250 7.368925399 25.073288927

Cu 1.270643031 9.600551424 25.019842961  
 Cu -0.004801995 11.812801454 25.024054169  
 Cu 8.949722575 0.737658854 25.023910534  
 Cu 7.669190158 2.945848472 25.009750439  
 Cu 6.371134841 5.161414671 25.037853980  
 Cu 5.096781032 7.373384006 25.039334944  
 Cu 3.832356342 9.601268312 25.011818522  
 Cu 2.557429834 11.812861586 25.024639086  
 Cu 11.505919883 0.737334546 25.029016907  
 Cu 10.227467714 2.949344127 25.018138494  
 Cu 8.948662725 5.170854477 24.997390209  
 Cu 7.667250772 7.382404319 24.997308596  
 Cu 6.393487100 9.601414475 25.001550548  
 Cu 5.113647231 11.814307591 25.023855453  
 Cu 14.069351628 0.733414524 25.027987690  
 Cu 12.785807823 2.949458953 25.016642894  
 Cu 11.493432790 5.173283134 25.005117693  
 Cu 10.222937808 7.389965513 25.008518653  
 Cu 8.951264614 9.598474087 25.010059133  
 Cu 7.672118979 11.807073580 25.018903317  
 Cu -0.013683573 -0.036596491 27.060687495  
 Cu -1.327056360 2.187132642 27.066327376  
 Cu -2.616701481 4.418018665 27.018470396  
 Cu -3.885479572 6.642941320 27.050673213  
 Cu -5.130390889 8.855244787 27.068273484  
 Cu -6.401210883 11.053682486 27.071117061  
 Cu 2.553960317 -0.041234353 27.060990609  
 Cu 1.267505553 2.115241593 27.191832974  
 Cu -0.106795115 4.442067151 27.139833115  
 Cu -1.349535994 6.660719747 27.123226862  
 Cu -2.583737644 8.875627127 27.066038632  
 Cu -3.846753357 11.067016576 27.070227457  
 Cu 5.114753152 -0.009941766 27.069957898  
 Cu 3.849892716 2.167395985 27.057222485  
 Cu 2.594854891 4.455803753 27.134157868  
 Cu 1.247704997 6.696213600 27.125114969  
 Cu -0.021776363 8.907342480 27.053516397  
 Cu -1.291841425 11.082919334 27.072907357  
 Cu 7.674667551 -0.003765905 27.074732632  
 Cu 6.420986930 2.186199681 27.059821765  
 Cu 5.161506840 4.409451944 27.166319483  
 Cu 3.861006869 6.697611778 27.159374958  
 Cu 2.554250493 8.916521404 27.046427428  
 Cu 1.274166472 11.092295160 27.075675619  
 Cu 10.225354187 0.001906338 27.072229299  
 Cu 8.948062267 2.217343578 27.072520525  
 Cu 7.699914160 4.427135362 27.014813890  
 Cu 6.435088607 6.666124132 27.043073146  
 Cu 5.128361290 8.891378829 27.026196838  
 Cu 3.840819936 11.082753882 27.076207470  
 Cu 12.778442479 -0.007261451 27.076053143  
 Cu 11.490232229 2.213664571 27.081019354  
 Cu 10.210109370 4.425514970 27.061832228  
 Cu 8.943145448 6.640533913 27.043914633  
 Cu 7.668531575 8.865530017 27.030727781  
 Cu 6.390695826 11.068884074 27.071963006  
 O 0.243110860 5.362041710 31.055419299  
 S -0.021088540 6.548294463 30.260058872  
 C -0.220948158 8.005305021 31.459823626  
 C -1.347148356 7.856427736 32.535705467  
 O -1.044202660 6.767778148 33.333048565  
 C -1.677282250 6.590277116 34.558891741  
 F -1.153253832 7.394747978 35.506891584  
 F -3.007749615 6.821633171 34.496628081  
 F -1.466776696 5.314611258 34.909597865  
 F -1.426337570 9.013307788 33.253468575

F -2.554606943 7.695157435 31.911750565  
 F -0.502438312 9.113957481 30.723766441  
 F 0.965298648 8.190172975 32.098597864  
 O -1.308517754 6.558632783 29.499511731  
 O 1.114332700 7.024801728 29.410745168  
 O 3.842255103 6.749798912 29.383737341  
 H 2.889220297 6.857468121 29.627893962  
 H 4.657841134 5.229752349 29.556615710  
 H 4.354957394 7.553412448 29.710428833  
 O 5.352340384 8.812549361 30.202431926  
 H 5.316005018 9.520199012 29.522901200  
 H 6.298968777 8.550366918 30.230817273  
 O 11.766406536 5.163493412 30.132212029  
 O 9.549140026 5.795467106 30.957026354  
 O 8.250140469 7.917520713 30.058916887  
 O 7.933982909 3.857495493 30.153859723  
 H 10.573417784 5.606562879 30.563534035  
 H 12.560656811 5.760474989 30.052850830  
 H 9.125490407 6.652249106 30.609571978  
 H 8.946099485 5.025634607 30.684899825  
 H 8.788012459 8.732263149 29.976407256  
 H 8.097284176 7.676154784 29.097988079  
 H 11.656875209 4.790967701 29.219694575  
 H 8.174302834 3.648174636 29.206351581  
 O 5.082121859 4.360230177 29.318393194  
 H 5.986319966 4.342352112 29.698345250  
 H 7.943584559 2.994696871 30.609494222  
 End final coordinates

**Fourth-protonation on Cu(111) surfaces**

*NH-Eigen-Cu111*

CELL\_PARAMETERS (angstrom)  
 15.346059799 0.000000000 0.000000000  
 -7.673035145 13.290086719 0.000000000  
 0.000000000 0.000000000 50.000000000

ATOMIC\_POSITIONS (angstrom)

Cu -0.000007673 1.476686458 22.979062321 0 0 0  
 Cu -1.278853909 3.691714611 22.979062321 0 0 0  
 Cu -2.557704748 5.906745834 22.979062321 0 0 0  
 Cu -3.836550983 8.121773987 22.979062321 0 0 0  
 Cu -5.115401823 10.336806743 22.979062321 0 0 0  
 Cu -6.394248058 12.551839500 22.979062321 0 0 0  
 Cu 2.557686333 1.476686458 22.979062321 0 0 0  
 Cu 1.278835493 3.691714611 22.979062321 0 0 0  
 Cu -0.000009208 5.906745834 22.979062321 0 0 0  
 Cu -1.278855443 8.121773987 22.979062321 0 0 0  
 Cu -2.557706282 10.336806743 22.979062321 0 0 0  
 Cu -3.836552518 12.551839500 22.979062321 0 0 0  
 Cu 5.115381873 1.476686458 22.979062321 0 0 0  
 Cu 3.836531033 3.691714611 22.979062321 0 0 0  
 Cu 2.557684798 5.906745834 22.979062321 0 0 0  
 Cu 1.278833959 8.121773987 22.979062321 0 0 0  
 Cu -0.000012277 10.336806743 22.979062321 0 0 0  
 Cu -1.278858512 12.551839500 22.979062321 0 0 0  
 Cu 7.673075878 1.476686458 22.979062321 0 0 0  
 Cu 6.394226574 3.691714611 22.979062321 0 0 0  
 Cu 5.115380338 5.906745834 22.979062321 0 0 0  
 Cu 3.836529499 8.121773987 22.979062321 0 0 0  
 Cu 2.557683263 10.336806743 22.979062321 0 0 0  
 Cu 1.278832424 12.551839500 22.979062321 0 0 0  
 Cu 10.230771419 1.476686458 22.979062321 0 0 0  
 Cu 8.951920579 3.691714611 22.979062321 0 0 0  
 Cu 7.673075878 5.906745834 22.979062321 0 0 0





|    |              |              |              |   |   |   |    |              |              |              |
|----|--------------|--------------|--------------|---|---|---|----|--------------|--------------|--------------|
| Cu | 7.673062067  | 1.476683389  | 22.979020887 | 0 | 0 | 0 | Cu | -2.568199820 | 8.875653675  | 27.068976402 |
| Cu | 6.394215831  | 3.691708473  | 22.979020887 | 0 | 0 | 0 | Cu | -3.835157155 | 11.070521663 | 27.070954675 |
| Cu | 5.115371131  | 5.906735091  | 22.979020887 | 0 | 0 | 0 | Cu | 5.124956347  | 0.001649824  | 27.078306004 |
| Cu | 3.836523360  | 8.121760175  | 22.979020887 | 0 | 0 | 0 | Cu | 3.884173576  | 2.202409902  | 27.081426551 |
| Cu | 2.557678660  | 10.336788328 | 22.979020887 | 0 | 0 | 0 | Cu | 2.654399469  | 4.471340286  | 27.190193936 |
| Cu | 1.278830889  | 12.551816481 | 22.979020887 | 0 | 0 | 0 | Cu | 1.298261743  | 6.697519340  | 27.156318726 |
| Cu | 10.230753003 | 1.476683389  | 22.979020887 | 0 | 0 | 0 | Cu | -0.001339210 | 8.898951756  | 27.067256393 |
| Cu | 8.951905233  | 3.691708473  | 22.979020887 | 0 | 0 | 0 | Cu | -1.278669409 | 11.085488764 | 27.072579768 |
| Cu | 7.673062067  | 5.906735091  | 22.979020887 | 0 | 0 | 0 | Cu | 7.678697329  | 0.008596628  | 27.076815817 |
| Cu | 6.394214297  | 8.121760175  | 22.979020887 | 0 | 0 | 0 | Cu | 6.410191994  | 2.228716509  | 27.084333907 |
| Cu | 5.115369596  | 10.336788328 | 22.979020887 | 0 | 0 | 0 | Cu | 5.160494067  | 4.450363840  | 27.032290688 |
| Cu | 3.836521826  | 12.551816481 | 22.979020887 | 0 | 0 | 0 | Cu | 3.884320022  | 6.668187456  | 27.054067429 |
| Cu | 12.788443940 | 1.476683389  | 22.979020887 | 0 | 0 | 0 | Cu | 2.578537006  | 8.887397715  | 27.068484301 |
| Cu | 11.509596170 | 3.691708473  | 22.979020887 | 0 | 0 | 0 | Cu | 1.284554731  | 11.089297375 | 27.076707215 |
| Cu | 10.230751469 | 5.906735091  | 22.979020887 | 0 | 0 | 0 | Cu | 10.230220587 | 0.005078910  | 27.074294890 |
| Cu | 8.951905233  | 8.121760175  | 22.979020887 | 0 | 0 | 0 | Cu | 8.947892564  | 2.227984874  | 27.075796628 |
| Cu | 7.673060532  | 10.336788328 | 22.979020887 | 0 | 0 | 0 | Cu | 7.685403598  | 4.442805976  | 27.026015529 |
| Cu | 6.394212762  | 12.551816481 | 22.979020887 | 0 | 0 | 0 | Cu | 6.421091804  | 6.660148172  | 27.062341363 |
| N  | 1.271837508  | 3.715815355  | 28.253516016 |   |   |   | Cu | 5.125691614  | 8.868012449  | 27.029081684 |
| H  | 1.204082321  | 3.744935014  | 29.276042160 |   |   |   | Cu | 3.845504541  | 11.075069757 | 27.076465738 |
| Cu | 1.280906246  | 0.763001685  | 25.065522625 |   |   |   | Cu | 12.784793025 | -0.007828338 | 27.076863578 |
| Cu | 0.006773388  | 2.956767000  | 25.047346267 |   |   |   | Cu | 11.497546705 | 2.217231467  | 27.080501620 |
| Cu | -1.259470058 | 5.171084768  | 25.063828832 |   |   |   | Cu | 10.218062345 | 4.432960512  | 27.059235464 |
| Cu | -2.551495931 | 7.384408264  | 25.037244499 |   |   |   | Cu | 8.951670430  | 6.645780326  | 27.047269644 |
| Cu | -3.836652761 | 9.597830547  | 25.021963291 |   |   |   | Cu | 7.673365207  | 8.863253617  | 27.036957151 |
| Cu | -5.114780362 | 11.807835936 | 25.021270584 |   |   |   | Cu | 6.395008038  | 11.061279478 | 27.072731079 |
| Cu | 3.832687942  | 0.739691659  | 25.034773648 |   |   |   | O  | 0.273705827  | 5.262540352  | 31.156459711 |
| Cu | 2.550676944  | 2.959426840  | 25.055229835 |   |   |   | S  | 0.056041344  | 6.484692596  | 30.399003760 |
| Cu | 1.280480975  | 5.176616972  | 25.074732252 |   |   |   | C  | -0.094110817 | 7.905482886  | 31.653043723 |
| Cu | -0.000190438 | 7.375168962  | 25.075867127 |   |   |   | C  | -1.257670941 | 7.795124941  | 32.694423235 |
| Cu | -1.279739587 | 9.601077800  | 25.025143798 |   |   |   | O  | -1.050959004 | 6.664862853  | 33.465827812 |
| Cu | -2.558119506 | 11.816091012 | 25.027417184 |   |   |   | C  | -1.732616347 | 6.495641776  | 34.667193926 |
| Cu | 6.397957228  | 0.739134572  | 25.029918506 |   |   |   | F  | -1.191932171 | 7.240019080  | 35.653851510 |
| Cu | 5.116905400  | 2.955176028  | 25.025053524 |   |   |   | F  | -3.044027436 | 6.811138736  | 34.571371691 |
| Cu | 3.814512480  | 5.158988385  | 25.052529452 |   |   |   | F  | -1.613589421 | 5.200354258  | 34.988303269 |
| Cu | 2.550440101  | 7.381232516  | 25.052255363 |   |   |   | F  | -1.279983937 | 8.931929540  | 33.447671673 |
| Cu | 1.279984934  | 9.604735019  | 25.027299661 |   |   |   | F  | -2.454942513 | 7.733736653  | 32.035217354 |
| Cu | 0.000897059  | 11.816910530 | 25.025890203 |   |   |   | F  | -0.285170491 | 9.054773158  | 30.951375021 |
| Cu | 8.954212031  | 0.741850113  | 25.026745348 |   |   |   | F  | 1.082512098  | 7.994335050  | 32.331290019 |
| Cu | 7.674577908  | 2.950603896  | 25.014717348 |   |   |   | O  | -1.208788531 | 6.574692564  | 29.621872556 |
| Cu | 6.401860625  | 5.178443756  | 25.001439610 |   |   |   | O  | 1.238781442  | 6.938591094  | 29.588145804 |
| Cu | 5.122654394  | 7.385655083  | 25.006325092 |   |   |   | O  | 3.645752094  | 6.574238716  | 30.632388548 |
| Cu | 3.836244087  | 9.603406758  | 25.012051506 |   |   |   | H  | 2.738131225  | 6.701430786  | 30.193843969 |
| Cu | 2.562073783  | 11.815570937 | 25.026663492 |   |   |   | H  | 4.071931067  | 5.647914353  | 30.409004815 |
| Cu | 11.509673474 | 0.737710061  | 25.030521294 |   |   |   | H  | 4.310313675  | 7.364297777  | 30.441185439 |
| Cu | 10.232214967 | 2.951355341  | 25.021730015 |   |   |   | O  | 5.270657244  | 8.492949851  | 30.307719897 |
| Cu | 8.958305230  | 5.172561120  | 25.003018229 |   |   |   | H  | 5.126977925  | 8.952232319  | 29.446638986 |
| Cu | 7.677776242  | 7.386874810  | 25.004322033 |   |   |   | H  | 6.225223144  | 8.244542838  | 30.297083829 |
| Cu | 6.399185552  | 9.603313278  | 25.004835755 |   |   |   | O  | 11.745191650 | 5.213333430  | 30.136441543 |
| Cu | 5.118352415  | 11.814437416 | 25.026855592 |   |   |   | O  | 9.468719967  | 5.709683350  | 30.910593460 |
| Cu | 14.074942486 | 0.733445177  | 25.034189773 |   |   |   | O  | 8.134614232  | 7.838055155  | 30.075501673 |
| Cu | 12.791492377 | 2.951068806  | 25.022519081 |   |   |   | O  | 7.707946420  | 3.836567381  | 30.205621002 |
| Cu | 11.501010175 | 5.175268462  | 25.006213424 |   |   |   | H  | 10.505228325 | 5.565088499  | 30.540644927 |
| Cu | 10.231557596 | 7.391186945  | 25.010765078 |   |   |   | H  | 12.533338640 | 5.817749657  | 30.142343377 |
| Cu | 8.957835506  | 9.598735371  | 25.012992135 |   |   |   | H  | 9.036346354  | 6.569868836  | 30.586597236 |
| Cu | 7.677194795  | 11.806381047 | 25.023347766 |   |   |   | H  | 8.857949524  | 4.946492970  | 30.637553668 |
| Cu | -0.002500080 | -0.035459344 | 27.068265524 |   |   |   | H  | 8.626131979  | 6.84829459   | 30.089532151 |
| Cu | -1.318922547 | 2.189760146  | 27.076906022 |   |   |   | H  | 8.048385941  | 7.658947523  | 29.090553356 |
| Cu | -2.600660772 | 4.427797353  | 27.026388317 |   |   |   | H  | 11.697278437 | 4.892202704  | 29.198409423 |
| Cu | -3.866051256 | 6.648022769  | 27.053479875 |   |   |   | H  | 7.796972864  | 3.688732150  | 29.220265495 |
| Cu | -5.120043740 | 8.856251223  | 27.071426387 |   |   |   | O  | 4.684658624  | 4.285098386  | 30.210289775 |
| Cu | -6.391192238 | 11.053716831 | 27.072692273 |   |   |   | H  | 5.666686596  | 4.226400932  | 30.189571363 |
| Cu | 2.565798300  | -0.028605205 | 27.066876661 |   |   |   | H  | 4.395924617  | 3.929808089  | 29.334547742 |
| Cu | 1.279127369  | 2.129932615  | 27.197831221 |   |   |   | H  | 7.833012316  | 2.948406753  | 30.591344857 |
| Cu | -0.085919717 | 4.452598883  | 27.145444975 |   |   |   |    |              |              |              |
| Cu | -1.318127283 | 6.665277455  | 27.128052858 |   |   |   |    |              |              |              |

End final coordinates

NH<sub>2</sub>-Cu111

CELL\_PARAMETERS (angstrom)

15.346059799 0.000000000 0.000000000  
-7.673035145 13.290086719 0.000000000  
0.000000000 0.000000000 50.000000000

ATOMIC\_POSITIONS (angstrom)

Cu -0.000007673 1.476683389 22.979020887 0 0 0  
Cu -1.278852374 3.691708473 22.979020887 0 0 0  
Cu -2.557700144 5.906735091 22.979020887 0 0 0  
Cu -3.836544845 8.121760175 22.979020887 0 0 0  
Cu -5.115392615 10.336788328 22.979020887 0 0 0  
Cu -6.394237316 12.551816481 22.979020887 0 0 0  
Cu 2.557681729 1.476683389 22.979020887 0 0 0  
Cu 1.278833959 3.691708473 22.979020887 0 0 0  
Cu -0.000009208 5.906735091 22.979020887 0 0 0  
Cu -1.278853909 8.121760175 22.979020887 0 0 0  
Cu -2.557701679 10.336788328 22.979020887 0 0 0  
Cu -3.836546380 12.551816481 22.979020887 0 0 0  
Cu 5.115372665 1.476683389 22.979020887 0 0 0  
Cu 3.836524895 3.691708473 22.979020887 0 0 0  
Cu 2.557680194 5.906735091 22.979020887 0 0 0  
Cu 1.278832424 8.121760175 22.979020887 0 0 0  
Cu -0.000012277 10.336788328 22.979020887 0 0 0  
Cu -1.278856978 12.551816481 22.979020887 0 0 0  
Cu 7.673062067 1.476683389 22.979020887 0 0 0  
Cu 6.394215831 3.691708473 22.979020887 0 0 0  
Cu 5.115371131 5.906735091 22.979020887 0 0 0  
Cu 3.836523360 8.121760175 22.979020887 0 0 0  
Cu 2.557678660 10.336788328 22.979020887 0 0 0  
Cu 1.278830889 12.551816481 22.979020887 0 0 0  
Cu 10.230753003 1.476683389 22.979020887 0 0 0  
Cu 8.951905233 3.691708473 22.979020887 0 0 0  
Cu 7.673062067 5.906735091 22.979020887 0 0 0  
Cu 6.394214297 8.121760175 22.979020887 0 0 0  
Cu 5.115369596 10.336788328 22.979020887 0 0 0  
Cu 3.836521826 12.551816481 22.979020887 0 0 0  
Cu 12.788443940 1.476683389 22.979020887 0 0 0  
Cu 11.509596170 3.691708473 22.979020887 0 0 0  
Cu 10.230751469 5.906735091 22.979020887 0 0 0  
Cu 8.951905233 8.121760175 22.979020887 0 0 0  
Cu 7.673060532 10.336788328 22.979020887 0 0 0  
Cu 6.394212762 12.551816481 22.979020887 0 0 0  
N 1.943980702 3.354223904 28.696417049  
H 1.214446146 3.695426082 29.326067862  
Cu 1.288381226 0.773594372 25.074876051  
Cu 0.023440184 2.948798508 25.053549283  
Cu -1.283306989 5.175823673 25.000566508  
Cu -2.560760736 7.386226531 25.018480514  
Cu -3.839027367 9.594516540 25.023367671  
Cu -5.116817156 11.809471381 25.021071797  
Cu 3.836066108 0.720810017 25.006782442  
Cu 2.556263206 2.963746839 25.056384068  
Cu 1.294786846 5.166205727 25.035408145  
Cu -0.004854267 7.388154777 25.018001982  
Cu -1.281780171 9.595406267 25.024802693  
Cu -2.555347992 11.803633224 25.021309921  
Cu 6.400635293 0.726937358 25.010490953  
Cu 5.121180416 2.976242883 25.035440677  
Cu 3.825551618 5.159849778 25.125047513  
Cu 2.573437993 7.378775650 25.047928921  
Cu 1.275303614 9.596559741 25.021820712  
Cu 0.002775225 11.805914812 25.023686918  
Cu 8.956644263 0.732219278 25.016402117  
Cu 7.680472190 2.966324138 25.045653855  
Cu 6.391811974 5.149133101 25.085324358

Cu 5.104447354 7.366531752 25.039403159  
Cu 3.835591070 9.602039590 25.015813797  
Cu 2.560673629 11.811327550 25.024297228  
Cu 11.514421594 0.738545736 25.028702635  
Cu 10.237043158 2.951245379 25.017984269  
Cu 8.936273962 5.159897016 25.049982084  
Cu 7.672918395 7.379816571 25.003803439  
Cu 6.398195799 9.603593650 25.001174904  
Cu 5.118743888 11.815538923 25.024204274  
Cu 14.074993770 0.737353704 25.030336174  
Cu 12.793564023 2.951299477 25.016861961  
Cu 11.502413200 5.171477339 25.008973408  
Cu 10.227661594 7.382855049 25.013006708  
Cu 8.957225065 9.598966785 25.010679472  
Cu 7.679324351 11.817987317 25.023689046  
Cu 0.000803707 -0.007953426 27.075368278  
Cu -1.290775331 2.212047517 27.068250939  
Cu -2.567996385 4.432495008 27.044281016  
Cu -3.845858637 6.650367818 27.054745329  
Cu -5.119881564 8.858144086 27.073499521  
Cu -6.393247032 11.064764499 27.070003355  
Cu 2.573804879 -0.041824974 27.068825103  
Cu 1.288199217 2.172942224 27.236348888  
Cu -0.082722040 4.481927626 27.016975342  
Cu -1.304882281 6.663650018 27.075273338  
Cu -2.566158101 8.856156941 27.075549236  
Cu -3.834603166 11.057328010 27.071815581  
Cu 5.135178285 -0.036593424 27.067658053  
Cu 3.894107812 2.131270360 26.995468503  
Cu 2.496295669 4.472651717 27.167146203  
Cu 1.244906801 6.684751212 27.054121127  
Cu -0.007461901 8.869178788 27.073499660  
Cu -1.275941892 11.064467664 27.072087572  
Cu 7.690121728 -0.016122154 27.072986988  
Cu 6.426570805 2.157938698 27.034246221  
Cu 5.121082521 4.396474730 27.151432382  
Cu 3.834601677 6.695028089 27.153296612  
Cu 2.549391813 8.896282414 27.058601589  
Cu 1.281999229 11.078150487 27.074809514  
Cu 10.243181482 -0.008560895 27.074195302  
Cu 8.986317896 2.184580757 27.047942943  
Cu 7.721191707 4.425146955 27.180904367  
Cu 6.429560531 6.681766990 27.044932107  
Cu 5.131257449 8.891794551 27.025821866  
Cu 3.847542319 11.078328282 27.077682409  
Cu 12.793232746 -0.002597962 27.074684003  
Cu 11.517584841 2.216612639 27.080950331  
Cu 10.259617213 4.425581625 27.058283858  
Cu 8.963770800 6.664926772 27.056774025  
Cu 7.676477341 8.874592294 27.028135577  
Cu 6.400837655 11.078848791 27.071255947  
O 3.885506436 6.799348129 29.439174800  
H 2.961283867 6.940547917 29.711477629  
H 4.642657313 5.209403159 29.523764659  
H 4.416659017 7.619714682 29.734019317  
O 5.310640027 8.873765848 30.193902067  
H 5.248169301 9.580752113 29.516653218  
H 6.274597444 8.645590865 30.228607316  
O 11.826920479 5.256087930 30.142894086  
O 9.195603425 5.620261033 30.836447216  
O 8.049294882 8.119405988 30.109839321  
O 7.696027209 4.133453009 29.417824094  
H 10.159589923 5.566906757 30.591796719  
H 12.222369299 5.977894047 29.611247797  
H 8.914351724 6.555632740 30.711778108  
H 8.342438701 4.732485297 29.979582081

H 8.624077205 8.909000937 30.089495428  
H 8.033224165 7.846776782 29.151667797  
H 11.815290568 4.512682413 29.501626322  
O 5.018532925 4.328852892 29.263745454  
H 5.979252955 4.306378109 29.527959256  
H 7.990386537 3.210351026 29.529650752  
H 2.723902344 3.035577608 29.277962373  
End final coordinates

*NH<sub>2</sub>-Cu111-Nafion*

CELL\_PARAMETERS (angstrom)

15.346059799 0.000000000 0.000000000  
-7.673035145 13.290086719 0.000000000  
0.000000000 0.000000000 50.000000000

ATOMIC\_POSITIONS (angstrom)

Cu -0.000007673 1.476683389 22.979020887 0 0 0  
Cu -1.278852374 3.691708473 22.979020887 0 0 0  
Cu -2.557700144 5.906735091 22.979020887 0 0 0  
Cu -3.836544845 8.121760175 22.979020887 0 0 0  
Cu -5.115392615 10.336788328 22.979020887 0 0 0  
Cu -6.394237316 12.551816481 22.979020887 0 0 0  
Cu 2.557681729 1.476683389 22.979020887 0 0 0  
Cu 1.278833959 3.691708473 22.979020887 0 0 0  
Cu -0.000009208 5.906735091 22.979020887 0 0 0  
Cu -1.278853909 8.121760175 22.979020887 0 0 0  
Cu -2.557701679 10.336788328 22.979020887 0 0 0  
Cu -3.836546380 12.551816481 22.979020887 0 0 0  
Cu 5.115372665 1.476683389 22.979020887 0 0 0  
Cu 3.836524895 3.691708473 22.979020887 0 0 0  
Cu 2.557680194 5.906735091 22.979020887 0 0 0  
Cu 1.278832424 8.121760175 22.979020887 0 0 0  
Cu -0.000012277 10.336788328 22.979020887 0 0 0  
Cu -1.278856978 12.551816481 22.979020887 0 0 0  
Cu 7.673062067 1.476683389 22.979020887 0 0 0  
Cu 6.394215831 3.691708473 22.979020887 0 0 0  
Cu 5.115371131 5.906735091 22.979020887 0 0 0  
Cu 3.836523360 8.121760175 22.979020887 0 0 0  
Cu 2.557678660 10.336788328 22.979020887 0 0 0  
Cu 1.278830889 12.551816481 22.979020887 0 0 0  
Cu 10.230753003 1.476683389 22.979020887 0 0 0  
Cu 8.951905233 3.691708473 22.979020887 0 0 0  
Cu 7.673062067 5.906735091 22.979020887 0 0 0  
Cu 6.394214297 8.121760175 22.979020887 0 0 0  
Cu 5.115369596 10.336788328 22.979020887 0 0 0  
Cu 3.836521826 12.551816481 22.979020887 0 0 0  
Cu 12.788443940 1.476683389 22.979020887 0 0 0  
Cu 11.509596170 3.691708473 22.979020887 0 0 0  
Cu 10.230751469 5.906735091 22.979020887 0 0 0  
Cu 8.951905233 8.121760175 22.979020887 0 0 0  
Cu 7.673060532 10.336788328 22.979020887 0 0 0  
Cu 6.394212762 12.551816481 22.979020887 0 0 0  
N 1.879468256 3.396183589 28.701131722  
H 1.166612342 3.798938379 29.317407948  
Cu 1.284828380 0.775883716 25.078374983  
Cu 0.016815097 2.944547513 25.041416722  
Cu -1.290154023 5.186958859 25.012905307  
Cu -2.556709549 7.387106925 25.037712462  
Cu -3.840841712 9.600142844 25.020990147  
Cu -5.118996592 11.814015273 25.022372821  
Cu 3.832467372 0.728168695 25.011683056  
Cu 2.551260974 2.964982233 25.055842491  
Cu 1.293025042 5.178520907 25.052690600  
Cu -0.005493299 7.381312819 25.055025412  
Cu -1.285226743 9.600632463 25.020587715  
Cu -2.559491244 11.809197621 25.021986342

Cu 6.393645060 0.734083905 25.018461488  
Cu 5.118740837 2.978462275 25.042488802  
Cu 3.824091519 5.161047987 25.138159582  
Cu 2.564299856 7.374372205 25.073386820  
Cu 1.276215594 9.599898695 25.018331036  
Cu -0.000276120 11.812865085 25.024033449  
Cu 8.954856223 0.738408296 25.023990512  
Cu 7.675397048 2.948133191 25.007747783  
Cu 6.369743387 5.163691489 25.042828562  
Cu 5.097840126 7.370813459 25.044589254  
Cu 3.838481757 9.604102163 25.012606147  
Cu 2.560692577 11.814804779 25.023529038  
Cu 11.512280316 0.738865051 25.028638432  
Cu 10.231302721 2.949863290 25.017051409  
Cu 8.951731285 5.172028139 24.997249070  
Cu 7.670901740 7.383323903 24.998631346  
Cu 6.399251225 9.603813345 25.002072427  
Cu 5.119153178 11.814662192 25.024775967  
Cu 14.072903631 0.732634749 25.028082686  
Cu 12.787062390 2.947270309 25.008908191  
Cu 11.496486729 5.172864585 25.006569749  
Cu 10.227879879 7.390963005 25.009780863  
Cu 8.955878749 9.602159645 25.011336315  
Cu 7.679435817 11.817258449 25.024486286  
Cu -0.002264532 -0.006880865 27.075707744  
Cu -1.305449353 2.206719605 27.059741176  
Cu -2.596970562 4.416354887 27.021618967  
Cu -3.872107801 6.642185342 27.052340522  
Cu -5.123429322 8.856385737 27.069381713  
Cu -6.394061574 11.064376304 27.073144448  
Cu 2.568601343 -0.028934562 27.071755184  
Cu 1.265581073 2.184642506 27.245886258  
Cu -0.091285021 4.452689995 26.992582066  
Cu -1.330688795 6.655408248 27.119954444  
Cu -2.575501780 8.875092636 27.067740531  
Cu -3.841193531 11.067226712 27.074226520  
Cu 5.129152232 -0.018692598 27.068989954  
Cu 3.894110069 2.150576633 27.005235067  
Cu 2.520306473 4.450668869 27.163898959  
Cu 1.248800552 6.687458499 27.111702138  
Cu -0.013264854 8.906553723 27.051836554  
Cu -1.282945917 11.079988298 27.073966124  
Cu 7.682567329 -0.003360857 27.073923503  
Cu 6.439348863 2.188002495 27.056568838  
Cu 5.162819637 4.400596210 27.173510363  
Cu 3.855433378 6.693743182 27.170007957  
Cu 2.560663683 8.920625085 27.046820349  
Cu 1.280662633 11.093781903 27.075124669  
Cu 10.233535750 0.004839076 27.072374690  
Cu 8.958592306 2.218804166 27.075093297  
Cu 7.708290992 4.430661052 27.016837528  
Cu 6.439355503 6.665919558 27.045832356  
Cu 5.135806866 8.894779356 27.026525546  
Cu 3.847566938 11.087379272 27.078779420  
Cu 12.787360561 -0.001795423 27.074847353  
Cu 11.499776188 2.217249276 27.078726567  
Cu 10.220506395 4.426749751 27.062580985  
Cu 8.952379494 6.642550266 27.044903700  
Cu 7.676416731 8.869356583 27.030780263  
Cu 6.401661325 11.077369790 27.073084188  
O 0.235935668 5.348644578 31.048206974  
S -0.019979997 6.550045441 30.268149817  
C -0.217065651 8.004343890 31.473719055  
C -1.347687296 7.857230650 32.544902998  
O -1.046416561 6.766941574 33.341608395  
C -1.680642355 6.588314779 34.566548819

|   |              |             |              |  |
|---|--------------|-------------|--------------|--|
| F | -1.157193245 | 7.391962726 | 35.516076921 |  |
| F | -3.010796055 | 6.819948142 | 34.503325182 |  |
| F | -1.470216237 | 5.311938156 | 34.916057050 |  |
| F | -1.427176564 | 9.013404142 | 33.263709544 |  |
| F | -2.553228205 | 7.697732460 | 31.918583090 |  |
| F | -0.494905708 | 9.111747664 | 30.734793964 |  |
| F | 0.967096644  | 8.188673184 | 32.116481292 |  |
| O | -1.307037015 | 6.570662101 | 29.510518429 |  |
| O | 1.120475676  | 7.020137375 | 29.425214188 |  |
| O | 3.853203358  | 6.753987291 | 29.386248477 |  |
| H | 2.900168980  | 6.859427854 | 29.630555325 |  |
| H | 4.641986778  | 5.227432757 | 29.552163053 |  |
| H | 4.365033745  | 7.560246768 | 29.710228915 |  |
| O | 5.356648853  | 8.819539120 | 30.202014620 |  |
| H | 5.321613248  | 9.526850312 | 29.521614386 |  |
| H | 6.302761339  | 8.555656632 | 30.230177204 |  |
| O | 11.764093327 | 5.164140440 | 30.136513574 |  |
| O | 9.540524514  | 5.792644614 | 30.954206347 |  |
| O | 8.250128799  | 7.917205761 | 30.056305673 |  |
| O | 7.922501153  | 3.854114969 | 30.156567325 |  |
| H | 10.564165037 | 5.604457081 | 30.564126729 |  |
| H | 12.554372352 | 5.764920722 | 30.059478164 |  |
| H | 9.119152380  | 6.650828728 | 30.606517335 |  |
| H | 8.936762770  | 5.023275000 | 30.680376336 |  |
| H | 8.790674516  | 8.730186110 | 29.971467866 |  |
| H | 8.096840643  | 7.674230696 | 29.095759400 |  |
| H | 11.659747902 | 4.790966823 | 29.223407236 |  |
| H | 8.153315366  | 3.653166877 | 29.204714206 |  |
| O | 5.053928513  | 4.345617180 | 29.334622782 |  |
| H | 5.959460164  | 4.329255603 | 29.712064605 |  |
| H | 7.954569850  | 2.988913205 | 30.606511043 |  |
| H | 2.626728088  | 3.044049154 | 29.305909469 |  |

End final coordinates

Fifth-protonation on Cu111 surfaces

*NH<sub>2</sub>-Eigen-Cu111*

CELL\_PARAMETERS (angstrom)

|              |              |              |
|--------------|--------------|--------------|
| 15.346059799 | 0.000000000  | 0.000000000  |
| -7.673035145 | 13.290086719 | 0.000000000  |
| 0.000000000  | 0.000000000  | 50.000000000 |

ATOMIC\_POSITIONS (angstrom)

|    |              |              |              |   |   |   |
|----|--------------|--------------|--------------|---|---|---|
| Cu | -0.000007673 | 1.476689528  | 22.979103755 | 0 | 0 | 0 |
| Cu | -1.278855443 | 3.691720750  | 22.979103755 | 0 | 0 | 0 |
| Cu | -2.557709352 | 5.906756576  | 22.979103755 | 0 | 0 | 0 |
| Cu | -3.836557122 | 8.121787798  | 22.979103755 | 0 | 0 | 0 |
| Cu | -5.115411030 | 10.336825159 | 22.979103755 | 0 | 0 | 0 |
| Cu | -6.394258800 | 12.551862519 | 22.979103755 | 0 | 0 | 0 |
| Cu | 2.557690936  | 1.476689528  | 22.979103755 | 0 | 0 | 0 |
| Cu | 1.278837028  | 3.691720750  | 22.979103755 | 0 | 0 | 0 |
| Cu | -0.000009208 | 5.906756576  | 22.979103755 | 0 | 0 | 0 |
| Cu | -1.278856978 | 8.121787798  | 22.979103755 | 0 | 0 | 0 |
| Cu | -2.557710886 | 10.336825159 | 22.979103755 | 0 | 0 | 0 |
| Cu | -3.836558656 | 12.551862519 | 22.979103755 | 0 | 0 | 0 |
| Cu | 5.115391080  | 1.476689528  | 22.979103755 | 0 | 0 | 0 |
| Cu | 3.836537172  | 3.691720750  | 22.979103755 | 0 | 0 | 0 |
| Cu | 2.557689402  | 5.906756576  | 22.979103755 | 0 | 0 | 0 |
| Cu | 1.278835493  | 8.121787798  | 22.979103755 | 0 | 0 | 0 |
| Cu | -0.000012277 | 10.336825159 | 22.979103755 | 0 | 0 | 0 |
| Cu | -1.278860047 | 12.551862519 | 22.979103755 | 0 | 0 | 0 |
| Cu | 7.673089690  | 1.476689528  | 22.979103755 | 0 | 0 | 0 |
| Cu | 6.394237316  | 3.691720750  | 22.979103755 | 0 | 0 | 0 |
| Cu | 5.115389546  | 5.906756576  | 22.979103755 | 0 | 0 | 0 |
| Cu | 3.836535637  | 8.121787798  | 22.979103755 | 0 | 0 | 0 |
| Cu | 2.557687867  | 10.336825159 | 22.979103755 | 0 | 0 | 0 |

|    |              |              |              |   |   |   |
|----|--------------|--------------|--------------|---|---|---|
| Cu | 1.278833959  | 12.551862519 | 22.979103755 | 0 | 0 | 0 |
| Cu | 10.230789834 | 1.476689528  | 22.979103755 | 0 | 0 | 0 |
| Cu | 8.951935925  | 3.691720750  | 22.979103755 | 0 | 0 | 0 |
| Cu | 7.673089690  | 5.906756576  | 22.979103755 | 0 | 0 | 0 |
| Cu | 6.394235781  | 8.121787798  | 22.979103755 | 0 | 0 | 0 |
| Cu | 5.115388011  | 10.336825159 | 22.979103755 | 0 | 0 | 0 |
| Cu | 3.836534103  | 12.551862519 | 22.979103755 | 0 | 0 | 0 |
| Cu | 12.788489978 | 1.476689528  | 22.979103755 | 0 | 0 | 0 |
| Cu | 11.509636069 | 3.691720750  | 22.979103755 | 0 | 0 | 0 |
| Cu | 10.230788299 | 5.906756576  | 22.979103755 | 0 | 0 | 0 |
| Cu | 8.951935925  | 8.121787798  | 22.979103755 | 0 | 0 | 0 |
| Cu | 7.673088155  | 10.336825159 | 22.979103755 | 0 | 0 | 0 |
| Cu | 6.394234247  | 12.551862519 | 22.979103755 | 0 | 0 | 0 |
| N  | 1.863211691  | 3.334065644  | 28.730368724 |   |   |   |
| H  | 1.129448025  | 3.753224961  | 29.308704583 |   |   |   |
| Cu | 1.287089253  | 0.774454668  | 25.076491810 |   |   |   |
| Cu | 0.019584464  | 2.946008252  | 25.050729941 |   |   |   |
| Cu | -1.276858754 | 5.174952764  | 25.002623749 |   |   |   |
| Cu | -2.551485336 | 7.388720579  | 25.019648788 |   |   |   |
| Cu | -3.832403829 | 9.600398261  | 25.027094575 |   |   |   |
| Cu | -5.113901476 | 11.816358655 | 25.025022768 |   |   |   |
| Cu | 3.835586459  | 0.731809141  | 25.020433502 |   |   |   |
| Cu | 2.557022691  | 2.959228058  | 25.069990193 |   |   |   |
| Cu | 1.301228296  | 5.156099617  | 25.054495870 |   |   |   |
| Cu | 0.005777629  | 7.384849906  | 25.022896797 |   |   |   |
| Cu | -1.275914222 | 9.598936223  | 25.027641781 |   |   |   |
| Cu | -2.553449648 | 11.813103448 | 25.026433063 |   |   |   |
| Cu | 6.400006552  | 0.737201609  | 25.026465510 |   |   |   |
| Cu | 5.122871431  | 2.958475850  | 25.008300825 |   |   |   |
| Cu | 3.809098512  | 5.162662183  | 25.104019202 |   |   |   |
| Cu | 2.578299540  | 7.378133845  | 25.052590795 |   |   |   |
| Cu | 1.279766109  | 9.598973440  | 25.023707250 |   |   |   |
| Cu | 0.004701928  | 11.812141151 | 25.027234938 |   |   |   |
| Cu | 8.958792793  | 0.740472137  | 25.028017223 |   |   |   |
| Cu | 7.678154252  | 2.949967150  | 25.015526425 |   |   |   |
| Cu | 6.397616067  | 5.173781217  | 25.007160193 |   |   |   |
| Cu | 5.107670864  | 7.370351421  | 25.038847790 |   |   |   |
| Cu | 3.836325806  | 9.603479345  | 25.017400944 |   |   |   |
| Cu | 2.562015441  | 11.815428018 | 25.027375133 |   |   |   |
| Cu | 11.512902392 | 0.741050922  | 25.031558970 |   |   |   |
| Cu | 10.234549989 | 2.952359200  | 25.021434163 |   |   |   |
| Cu | 8.960933899  | 5.173014044  | 25.009008292 |   |   |   |
| Cu | 7.679181383  | 7.387465407  | 25.002949851 |   |   |   |
| Cu | 6.400880943  | 9.604444278  | 25.002480657 |   |   |   |
| Cu | 5.118797440  | 11.816045408 | 25.026417631 |   |   |   |
| Cu | 14.072502470 | 0.736271075  | 25.031566999 |   |   |   |
| Cu | 12.790724891 | 2.952484334  | 25.019077263 |   |   |   |
| Cu | 11.510743252 | 5.172180246  | 25.012296340 |   |   |   |
| Cu | 10.236231796 | 7.390339109  | 25.013703466 |   |   |   |
| Cu | 8.962806599  | 9.605474495  | 25.012655774 |   |   |   |
| Cu | 7.680521821  | 11.818412654 | 25.025343546 |   |   |   |
| Cu | -0.001254919 | -0.008365045 | 27.076671112 |   |   |   |
| Cu | -1.302183438 | 2.211193658  | 27.070770488 |   |   |   |
| Cu | -2.567079616 | 4.436391930  | 27.047081244 |   |   |   |
| Cu | -3.836539851 | 6.654795199  | 27.053336788 |   |   |   |
| Cu | -5.117278802 | 8.859294053  | 27.074146684 |   |   |   |
| Cu | -6.389477968 | 11.070021771 | 27.072601867 |   |   |   |
| Cu | 2.579061536  | -0.018885187 | 27.074015943 |   |   |   |
| Cu | 1.262292645  | 2.183517975  | 27.222552813 |   |   |   |
| Cu | -0.068673888 | 4.473970367  | 27.017402073 |   |   |   |
| Cu | -1.289770801 | 6.657871136  | 27.078023989 |   |   |   |
| Cu | -2.557111342 | 8.859523042  | 27.076816518 |   |   |   |
| Cu | -3.830882102 | 11.067954567 | 27.074531837 |   |   |   |
| Cu | 5.135782497  | -0.012675869 | 27.077163990 |   |   |   |
| Cu | 3.926510919  | 2.179996079  | 27.026764340 |   |   |   |
| Cu | 2.589003009  | 4.434328279  | 27.238218136 |   |   |   |

|    |              |              |              |    |              |              |              |   |   |   |
|----|--------------|--------------|--------------|----|--------------|--------------|--------------|---|---|---|
| Cu | 1.274197379  | 6.664242443  | 27.064723096 | Cu | 3.836524895  | 3.691708473  | 22.979020887 | 0 | 0 | 0 |
| Cu | 0.005345927  | 8.863719682  | 27.075523228 | Cu | 2.557680194  | 5.906735091  | 22.979020887 | 0 | 0 | 0 |
| Cu | -1.271464548 | 11.072021942 | 27.073911664 | Cu | 1.278832424  | 8.121760175  | 22.979020887 | 0 | 0 | 0 |
| Cu | 7.685041623  | 0.001964469  | 27.074486335 | Cu | -0.000012277 | 10.336788328 | 22.979020887 | 0 | 0 | 0 |
| Cu | 6.428665146  | 2.217127974  | 27.079655148 | Cu | -1.278856978 | 12.551816481 | 22.979020887 | 0 | 0 | 0 |
| Cu | 5.172073867  | 4.420237671  | 27.037117166 | Cu | 7.673062067  | 1.476683389  | 22.979020887 | 0 | 0 | 0 |
| Cu | 3.866452357  | 6.658548658  | 27.167622408 | Cu | 6.394215831  | 3.691708473  | 22.979020887 | 0 | 0 | 0 |
| Cu | 2.559987585  | 8.881740219  | 27.062433390 | Cu | 5.115371131  | 5.906735091  | 22.979020887 | 0 | 0 | 0 |
| Cu | 1.284961101  | 11.080681882 | 27.076482943 | Cu | 3.836523360  | 8.121760175  | 22.979020887 | 0 | 0 | 0 |
| Cu | 10.235740367 | 0.005628345  | 27.076465490 | Cu | 2.557678660  | 10.336788328 | 22.979020887 | 0 | 0 | 0 |
| Cu | 8.960943531  | 2.226433927  | 27.078319571 | Cu | 1.278830889  | 12.551816481 | 22.979020887 | 0 | 0 | 0 |
| Cu | 7.697681108  | 4.439986152  | 27.034981569 | Cu | 10.230753003 | 1.476683389  | 22.979020887 | 0 | 0 | 0 |
| Cu | 6.437580213  | 6.650611119  | 27.044954185 | Cu | 8.951905233  | 3.691708473  | 22.979020887 | 0 | 0 | 0 |
| Cu | 5.133671626  | 8.881992225  | 27.021017888 | Cu | 7.673062067  | 5.906735091  | 22.979020887 | 0 | 0 | 0 |
| Cu | 3.845951258  | 11.077516704 | 27.080483775 | Cu | 6.394214297  | 8.121760175  | 22.979020887 | 0 | 0 | 0 |
| Cu | 12.787599993 | -0.000630429 | 27.076399542 | Cu | 5.115369596  | 10.336788328 | 22.979020887 | 0 | 0 | 0 |
| Cu | 11.507523340 | 2.226434322  | 27.081485340 | Cu | 3.836521826  | 12.551816481 | 22.979020887 | 0 | 0 | 0 |
| Cu | 10.234201114 | 4.435946813  | 27.060148278 | Cu | 12.788443940 | 1.476683389  | 22.979020887 | 0 | 0 | 0 |
| Cu | 8.965546299  | 6.651628532  | 27.052315408 | Cu | 11.509596170 | 3.691708473  | 22.979020887 | 0 | 0 | 0 |
| Cu | 7.678824038  | 8.869159475  | 27.028656750 | Cu | 10.230751469 | 5.906735091  | 22.979020887 | 0 | 0 | 0 |
| Cu | 6.400715468  | 11.076076091 | 27.071057333 | Cu | 8.951905233  | 8.121760175  | 22.979020887 | 0 | 0 | 0 |
| O  | 4.017690587  | 6.831284110  | 29.489765830 | Cu | 7.673060532  | 10.336788328 | 22.979020887 | 0 | 0 | 0 |
| H  | 3.099341180  | 7.051278913  | 29.732358935 | Cu | 6.394212762  | 12.551816481 | 22.979020887 | 0 | 0 | 0 |
| H  | 4.707702109  | 5.253839851  | 29.995198370 | N  | 1.860031894  | 3.352632206  | 28.722397231 |   |   |   |
| H  | 4.578316631  | 7.642926926  | 29.726745325 | H  | 1.161314833  | 3.796719596  | 29.328121503 |   |   |   |
| O  | 5.538584912  | 8.919305959  | 30.147348805 | Cu | 1.284397613  | 0.778239254  | 25.076230865 |   |   |   |
| H  | 5.485938794  | 9.607798522  | 29.447308225 | Cu | 0.015336501  | 2.948497292  | 25.041161728 |   |   |   |
| H  | 6.489846354  | 8.661842491  | 30.165226058 | Cu | -1.282161672 | 5.185256893  | 25.017006302 |   |   |   |
| O  | 11.650601258 | 5.081023754  | 30.099281930 | Cu | -2.551069514 | 7.387341716  | 25.039433215 |   |   |   |
| O  | 9.226169581  | 5.674006309  | 30.876822477 | Cu | -3.837437493 | 9.605105993  | 25.023702583 |   |   |   |
| O  | 8.363317885  | 8.105407895  | 30.110034533 | Cu | -5.116041852 | 11.821297738 | 25.024745428 |   |   |   |
| O  | 7.666051938  | 3.918960871  | 30.235719924 | Cu | 3.835537335  | 0.735495487  | 25.019785914 |   |   |   |
| H  | 10.170095143 | 5.473272791  | 30.535687502 | Cu | 2.550161513  | 2.959791440  | 25.069345729 |   |   |   |
| H  | 12.046848046 | 5.756607385  | 29.503488951 | Cu | 1.297218976  | 5.168716700  | 25.075178209 |   |   |   |
| H  | 8.943754269  | 6.589850387  | 30.577346955 | Cu | 0.000712778  | 7.377071764  | 25.061910416 |   |   |   |
| H  | 8.477161683  | 4.872008010  | 30.537150014 | Cu | -1.280194254 | 9.601598168  | 25.024014789 |   |   |   |
| H  | 8.938558573  | 8.855091959  | 30.355384320 | Cu | -2.554385745 | 11.817344878 | 25.025771740 |   |   |   |
| H  | 8.437010624  | 8.071138037  | 29.111877282 | Cu | 6.401053614  | 0.739813641  | 25.028958979 |   |   |   |
| H  | 11.623215836 | 4.291872071  | 29.511653485 | Cu | 5.126113662  | 2.958766755  | 25.006576921 |   |   |   |
| O  | 5.083188951  | 4.354585130  | 30.192207799 | Cu | 3.806680876  | 5.147952059  | 25.063568123 |   |   |   |
| H  | 6.672542666  | 4.162310916  | 30.235865439 | Cu | 2.553047243  | 7.382974308  | 25.042993650 |   |   |   |
| H  | 7.854347294  | 3.575126578  | 29.328491420 | Cu | 1.281028005  | 9.598791762  | 25.026950220 |   |   |   |
| H  | 4.795167854  | 3.809193593  | 29.427703812 | Cu | 0.005390832  | 11.813352636 | 25.027194533 |   |   |   |
| H  | 2.511723602  | 2.865465052  | 29.369261414 | Cu | 8.958710892  | 0.740489547  | 25.028150133 |   |   |   |

End final coordinates

*NH<sub>2</sub>-Eigen-Cu111-Nafion*

CELL\_PARAMETERS (angstrom)

15.346059799 0.000000000 0.000000000  
-7.673035145 13.290086719 0.000000000  
0.000000000 0.000000000 50.000000000

ATOMIC\_POSITIONS (angstrom)

|    |              |              |              |   |   |   |
|----|--------------|--------------|--------------|---|---|---|
| Cu | -0.000007673 | 1.476683389  | 22.979020887 | 0 | 0 | 0 |
| Cu | -1.278852374 | 3.691708473  | 22.979020887 | 0 | 0 | 0 |
| Cu | -2.557700144 | 5.906735091  | 22.979020887 | 0 | 0 | 0 |
| Cu | -3.836544845 | 8.121760175  | 22.979020887 | 0 | 0 | 0 |
| Cu | -5.115392615 | 10.336788328 | 22.979020887 | 0 | 0 | 0 |
| Cu | -6.394237316 | 12.551816481 | 22.979020887 | 0 | 0 | 0 |
| Cu | 2.557681729  | 1.476683389  | 22.979020887 | 0 | 0 | 0 |
| Cu | 1.278833959  | 3.691708473  | 22.979020887 | 0 | 0 | 0 |
| Cu | -0.000009208 | 5.906735091  | 22.979020887 | 0 | 0 | 0 |
| Cu | -1.278853909 | 8.121760175  | 22.979020887 | 0 | 0 | 0 |
| Cu | -2.557701679 | 10.336788328 | 22.979020887 | 0 | 0 | 0 |
| Cu | -3.836546380 | 12.551816481 | 22.979020887 | 0 | 0 | 0 |
| Cu | 5.115372665  | 1.476683389  | 22.979020887 | 0 | 0 | 0 |

|    |              |              |              |   |   |   |
|----|--------------|--------------|--------------|---|---|---|
| Cu | 3.836524895  | 3.691708473  | 22.979020887 | 0 | 0 | 0 |
| Cu | 2.557680194  | 5.906735091  | 22.979020887 | 0 | 0 | 0 |
| Cu | 1.278832424  | 8.121760175  | 22.979020887 | 0 | 0 | 0 |
| Cu | -0.000012277 | 10.336788328 | 22.979020887 | 0 | 0 | 0 |
| Cu | -1.278856978 | 12.551816481 | 22.979020887 | 0 | 0 | 0 |
| Cu | 7.673062067  | 1.476683389  | 22.979020887 | 0 | 0 | 0 |
| Cu | 6.394215831  | 3.691708473  | 22.979020887 | 0 | 0 | 0 |
| Cu | 5.115371131  | 5.906735091  | 22.979020887 | 0 | 0 | 0 |
| Cu | 3.836523360  | 8.121760175  | 22.979020887 | 0 | 0 | 0 |
| Cu | 2.557678660  | 10.336788328 | 22.979020887 | 0 | 0 | 0 |
| Cu | 1.278830889  | 12.551816481 | 22.979020887 | 0 | 0 | 0 |
| Cu | 10.230753003 | 1.476683389  | 22.979020887 | 0 | 0 | 0 |
| Cu | 8.951905233  | 3.691708473  | 22.979020887 | 0 | 0 | 0 |
| Cu | 7.673062067  | 5.906735091  | 22.979020887 | 0 | 0 | 0 |
| Cu | 6.394214297  | 8.121760175  | 22.979020887 | 0 | 0 | 0 |
| Cu | 5.115369596  | 10.336788328 | 22.979020887 | 0 | 0 | 0 |
| Cu | 3.836521826  | 12.551816481 | 22.979020887 | 0 | 0 | 0 |
| Cu | 12.788443940 | 1.476683389  | 22.979020887 | 0 | 0 | 0 |
| Cu | 11.509596170 | 3.691708473  | 22.979020887 | 0 | 0 | 0 |
| Cu | 10.230751469 | 5.906735091  | 22.979020887 | 0 | 0 | 0 |
| Cu | 8.951905233  | 8.121760175  | 22.979020887 | 0 | 0 | 0 |
| Cu | 7.673060532  | 10.336788328 | 22.979020887 | 0 | 0 | 0 |
| Cu | 6.394212762  | 12.551816481 | 22.979020887 | 0 | 0 | 0 |
| N  | 1.860031894  | 3.352632206  | 28.722397231 |   |   |   |
| H  | 1.161314833  | 3.796719596  | 29.328121503 |   |   |   |
| Cu | 1.284397613  | 0.778239254  | 25.076230865 |   |   |   |
| Cu | 0.015336501  | 2.948497292  | 25.041161728 |   |   |   |
| Cu | -1.282161672 | 5.185256893  | 25.017006302 |   |   |   |
| Cu | -2.551069514 | 7.387341716  | 25.039433215 |   |   |   |
| Cu | -3.837437493 | 9.605105993  | 25.023702583 |   |   |   |
| Cu | -5.116041852 | 11.821297738 | 25.024745428 |   |   |   |
| Cu | 3.835537335  | 0.735495487  | 25.019785914 |   |   |   |
| Cu | 2.550161513  | 2.959791440  | 25.069345729 |   |   |   |
| Cu | 1.297218976  | 5.168716700  | 25.075178209 |   |   |   |
| Cu | 0.000712778  | 7.377071764  | 25.061910416 |   |   |   |
| Cu | -1.280194254 | 9.601598168  | 25.024014789 |   |   |   |
| Cu | -2.554385745 | 11.817344878 | 25.025771740 |   |   |   |
| Cu | 6.401053614  | 0.739813641  | 25.028958979 |   |   |   |
| Cu | 5.126113662  | 2.958766755  | 25.006576921 |   |   |   |
| Cu | 3.806680876  | 5.147952059  | 25.063568123 |   |   |   |
| Cu | 2.553047243  | 7.382974308  | 25.042993650 |   |   |   |
| Cu | 1.281028005  | 9.598791762  | 25.026950220 |   |   |   |
| Cu | 0.005390832  | 11.813352636 | 25.027194533 |   |   |   |
| Cu | 8.958710892  | 0.740489547  | 25.028150133 |   |   |   |
| Cu | 7.676772197  | 2.951575920  | 25.013815598 |   |   |   |
| Cu | 6.398244186  | 5.180419261  | 25.000780333 |   |   |   |
| Cu | 5.116105708  | 7.379585894  | 25.009423139 |   |   |   |
| Cu | 3.837417228  | 9.602764980  | 25.013301518 |   |   |   |
| Cu | 2.563237866  | 11.814036641 | 25.027069375 |   |   |   |
| Cu | 11.512022215 | 0.740843867  | 25.029821328 |   |   |   |
| Cu | 10.229578083 | 2.953506483  | 25.020240682 |   |   |   |
| Cu | 8.956939118  | 5.175312595  | 25.004577321 |   |   |   |
| Cu | 7.674150606  | 7.390691978  | 25.006983352 |   |   |   |
| Cu | 6.397837784  | 9.607534143  | 25.007137358 |   |   |   |
| Cu | 5.118719308  | 11.814836842 | 25.028086423 |   |   |   |
| Cu | 14.071008255 | 0.736432854  | 25.028558046 |   |   |   |
| Cu | 12.786832648 | 2.952258644  | 25.012572121 |   |   |   |
| Cu | 11.503410748 | 5.175797064  | 25.009150830 |   |   |   |
| Cu | 10.230887895 | 7.395673299  | 25.013626339 |   |   |   |
| Cu | 8.956965422  | 9.609319302  | 25.015901319 |   |   |   |
| Cu | 7.679059854  | 11.821379658 | 25.027241117 |   |   |   |
| Cu | -0.003923966 | -0.004044892 | 27.075491930 |   |   |   |
| Cu | -1.310829198 | 2.210119280  | 27.064346686 |   |   |   |
| Cu | -2.588924250 | 4.424925242  | 27.031984471 |   |   |   |
| Cu | -3.861215562 | 6.649181381  | 27.054706959 |   |   |   |
| Cu | -5.121969116 | 8.865765746  | 27.072556776 |   |   |   |

Cu -6.390567649 11.076696274 27.073976786  
 Cu 2.575055111 -0.007260691 27.072039301  
 Cu 1.248892926 2.199999675 27.223826470  
 Cu -0.077212499 4.456100268 27.007669826  
 Cu -1.305171519 6.658045925 27.129059220  
 Cu -2.567790324 8.875068328 27.069359872  
 Cu -3.834453442 11.078527348 27.074605069  
 Cu 5.134998330 -0.003498280 27.077205169  
 Cu 3.924433327 2.188386386 27.022468796  
 Cu 2.611801413 4.439565488 27.235658001  
 Cu 1.295052762 6.671784332 27.126373300  
 Cu -0.000291497 8.892414307 27.062331547  
 Cu -1.274604979 11.082245240 27.074937108  
 Cu 7.684826944 0.005880234 27.076300807  
 Cu 6.425589899 2.229649510 27.083863095  
 Cu 5.164467233 4.440688351 27.026504711  
 Cu 3.866506168 6.651574395 27.058963738  
 Cu 2.579399632 8.878815450 27.067085491  
 Cu 1.288617489 11.082825517 27.077304732  
 Cu 10.235154977 0.004150554 27.075309983  
 Cu 8.953131896 2.228649892 27.079437243  
 Cu 7.687644393 4.446276628 27.030021526  
 Cu 6.412582446 6.657681802 27.063006174  
 Cu 5.124164496 8.862986480 27.030168711  
 Cu 3.848553265 11.073364820 27.080424294  
 Cu 12.786757025 -0.000991567 27.073199606  
 Cu 11.498779448 2.222176440 27.076348260  
 Cu 10.221913638 4.436886117 27.059211438  
 Cu 8.949629727 6.652086687 27.048295572  
 Cu 7.672276958 8.871569287 27.037404128  
 Cu 6.399034420 11.071653807 27.074238514  
 O 0.224786205 5.231289000 31.129529065  
 S 0.037631679 6.465879605 30.381289516  
 C -0.094200272 7.887744525 31.635637338  
 C -1.257681654 7.786161178 32.676351154  
 O -1.051671495 6.658555349 33.451694316  
 C -1.728810809 6.497311624 34.655831455  
 F -1.182397649 7.245760096 35.636344449  
 F -3.039891513 6.815921635 34.562912230  
 F -1.611780784 5.203404831 34.983355206  
 F -1.278996907 8.926317491 33.424680754  
 F -2.455373844 7.723335023 32.017670158  
 F -0.275440620 9.037509855 30.932719941  
 F 1.084305909 7.965876060 32.310976777  
 O -1.223483197 6.579492698 29.601341129  
 O 1.233406877 6.892723348 29.578585433  
 O 3.650355092 6.548885238 30.639489734  
 H 2.746683339 6.653782308 30.191876126  
 H 4.105163446 5.632918232 30.421804875  
 H 4.301136342 7.350708606 30.443130613  
 O 5.254108489 8.482019628 30.304297810  
 H 5.106241106 8.940523734 29.442637323  
 H 6.209469413 8.236841700 30.290511450  
 O 11.731345588 5.206212984 30.135663732  
 O 9.460569725 5.718016300 30.911731387  
 O 8.121875235 7.840630791 30.074869036  
 O 7.705545629 3.827416997 30.218577862  
 H 10.497334265 5.567876518 30.538395705  
 H 12.515724093 5.814267366 30.129382682  
 H 9.026692246 6.576552041 30.583787684  
 H 8.851456714 4.953113669 30.643687169  
 H 8.608223621 8.690592197 30.094988922  
 H 8.041015776 7.665775858 29.088087027  
 H 11.678280384 4.876104313 29.199778530  
 H 7.770551669 3.704679164 29.226365491  
 O 4.759767583 4.302193243 30.193810778

H 5.739498023 4.232396101 30.275976839  
 H 4.578322005 4.062803057 29.249412224  
 H 7.858313133 2.931750307 30.576259988  
 H 2.503119578 2.859317356 29.347540489  
 End final coordinates

*NH<sub>3</sub>-CuIII*

CELL\_PARAMETERS (angstrom)  
 15.346059799 0.000000000 0.000000000  
 -7.673035145 13.290086719 0.000000000  
 0.000000000 0.000000000 50.000000000

ATOMIC\_POSITIONS (angstrom)

Cu -0.000007673 1.476683389 22.979020887 0 0 0  
 Cu -1.278852374 3.691708473 22.979020887 0 0 0  
 Cu -2.557700144 5.906735091 22.979020887 0 0 0  
 Cu -3.836544845 8.121760175 22.979020887 0 0 0  
 Cu -5.115392615 10.336788328 22.979020887 0 0 0  
 Cu -6.394237316 12.551816481 22.979020887 0 0 0  
 Cu 2.557681729 1.476683389 22.979020887 0 0 0  
 Cu 1.278833959 3.691708473 22.979020887 0 0 0  
 Cu -0.000009208 5.906735091 22.979020887 0 0 0  
 Cu -1.278853909 8.121760175 22.979020887 0 0 0  
 Cu -2.557701679 10.336788328 22.979020887 0 0 0  
 Cu -3.836546380 12.551816481 22.979020887 0 0 0  
 Cu 5.115372665 1.476683389 22.979020887 0 0 0  
 Cu 3.836524895 3.691708473 22.979020887 0 0 0  
 Cu 2.557680194 5.906735091 22.979020887 0 0 0  
 Cu 1.278832424 8.121760175 22.979020887 0 0 0  
 Cu -0.000012277 10.336788328 22.979020887 0 0 0  
 Cu -1.278856978 12.551816481 22.979020887 0 0 0  
 Cu 7.673062067 1.476683389 22.979020887 0 0 0  
 Cu 6.394215831 3.691708473 22.979020887 0 0 0  
 Cu 5.115371131 5.906735091 22.979020887 0 0 0  
 Cu 3.836523360 8.121760175 22.979020887 0 0 0  
 Cu 2.557678660 10.336788328 22.979020887 0 0 0  
 Cu 1.278830889 12.551816481 22.979020887 0 0 0  
 Cu 10.230753003 1.476683389 22.979020887 0 0 0  
 Cu 8.951905233 3.691708473 22.979020887 0 0 0  
 Cu 7.673062067 5.906735091 22.979020887 0 0 0  
 Cu 6.394214297 8.121760175 22.979020887 0 0 0  
 Cu 5.115369596 10.336788328 22.979020887 0 0 0  
 Cu 3.836521826 12.551816481 22.979020887 0 0 0  
 Cu 12.788443940 1.476683389 22.979020887 0 0 0  
 Cu 11.509596170 3.691708473 22.979020887 0 0 0  
 Cu 10.230751469 5.906735091 22.979020887 0 0 0  
 Cu 8.951905233 8.121760175 22.979020887 0 0 0  
 Cu 7.673060532 10.336788328 22.979020887 0 0 0  
 Cu 6.394212762 12.551816481 22.979020887 0 0 0  
 N 1.560913431 2.354121527 29.333999521  
 H 0.920148092 3.043007133 29.738277002  
 Cu 1.283400996 0.761275819 25.063324838  
 Cu 0.021636047 2.944183507 25.063872710  
 Cu -1.282774246 5.169733226 25.010710600  
 Cu -2.558541999 7.382769857 25.020289047  
 Cu -3.835990979 9.593234163 25.025998030  
 Cu -5.114920786 11.808559210 25.017126949  
 Cu 3.840396601 0.726536907 25.008994356  
 Cu 2.546901672 2.946625695 25.043147327  
 Cu 1.271349962 5.175585489 25.007055554  
 Cu -0.004408036 7.386520724 25.019006846  
 Cu -1.281377822 9.593719245 25.026571180  
 Cu -2.556608203 11.804065545 25.023972153  
 Cu 6.397910042 0.726805575 25.010834407  
 Cu 5.119460278 2.971552482 25.034956552  
 Cu 3.858681129 5.177921185 25.060746156

Cu 2.568299996 7.377574570 25.040933434  
 Cu 1.274633263 9.596033447 25.019531640  
 Cu 0.001382039 11.805876791 25.025150532  
 Cu 8.954385844 0.729410032 25.017629289  
 Cu 7.678616025 2.963179106 25.047492695  
 Cu 6.396429723 5.145658731 25.089424715  
 Cu 5.109481684 7.374238026 25.036816976  
 Cu 3.834341628 9.600642409 25.015079091  
 Cu 2.560298533 11.809874390 25.026636903  
 Cu 11.513408654 0.736122138 25.028374341  
 Cu 10.235424886 2.948241063 25.019774017  
 Cu 8.935612456 5.156036525 25.054270635  
 Cu 7.674597058 7.377499242 25.004986917  
 Cu 6.399329599 9.604766683 25.001682663  
 Cu 5.119123457 11.815061603 25.024518555  
 Cu 14.071901266 0.738459763 25.026589460  
 Cu 12.791831300 2.949641997 25.015375897  
 Cu 11.503803527 5.168185665 25.011516780  
 Cu 10.228601493 7.380701444 25.016135866  
 Cu 8.960480292 9.600209477 25.011620233  
 Cu 7.679399158 11.815908303 25.021259613  
 Cu -0.005367434 -0.013897381 27.065344279  
 Cu -1.293199129 2.212936098 27.066083151  
 Cu -2.553006756 4.427188757 27.044669017  
 Cu -3.841855326 6.644262289 27.054713892  
 Cu -5.118234195 8.856257922 27.075824083  
 Cu -6.390904773 11.069746032 27.071953108  
 Cu 2.575600652 -0.034541266 27.054426375  
 Cu 1.294038660 2.221498409 27.224189582  
 Cu -0.022537058 4.460635029 27.055018766  
 Cu -1.294341526 6.648993904 27.076653561  
 Cu -2.562527699 8.850995750 27.077747370  
 Cu -3.834413046 11.059369402 27.074844144  
 Cu 5.122743134 -0.022619293 27.070601599  
 Cu 3.859120208 2.169711746 27.012297784  
 Cu 2.519176360 4.466146714 27.009879004  
 Cu 1.255391502 6.657410958 27.060433981  
 Cu -0.002659380 8.858186121 27.073218261  
 Cu -1.277180481 11.064046118 27.072597896  
 Cu 7.682566898 -0.014968573 27.072732742  
 Cu 6.408092976 2.163010577 27.034784428  
 Cu 5.079663834 4.403923420 27.155610880  
 Cu 3.836699480 6.689418069 27.141846900  
 Cu 2.548557395 8.886219105 27.055905954  
 Cu 1.280818451 11.072394727 27.075009151  
 Cu 10.240771929 -0.010913440 27.074913303  
 Cu 8.978455868 2.183162414 27.052035405  
 Cu 7.693671049 4.419974366 27.184688901  
 Cu 6.423583329 6.676952720 27.048564115  
 Cu 5.131315442 8.889106066 27.026819730  
 Cu 3.846088363 11.074030705 27.078374907  
 Cu 12.793533751 -0.003557877 27.076791101  
 Cu 11.515666934 2.214957613 27.082175368  
 Cu 10.253748721 4.420572454 27.059577569  
 Cu 8.960714204 6.658300734 27.060626266  
 Cu 7.678239903 8.872388066 27.024461048  
 Cu 6.400645639 11.075651065 27.075578039  
 O 3.871023771 6.864200631 29.477476295  
 H 2.939459254 7.072961832 29.672780582  
 H 4.550299877 5.234345787 29.551802548  
 H 4.417158632 7.679207223 29.749001687  
 O 5.314451096 8.964389392 30.187556923  
 H 5.237854480 9.652286425 29.491240153  
 H 6.279315039 8.742528280 30.214415572  
 O 11.792686314 5.184578862 30.119523877  
 O 9.146639888 5.639163439 30.762588400

O 8.062310368 8.199139201 30.109029302  
 O 7.591473899 4.123885135 29.413448693  
 H 10.108676630 5.561001129 30.520350775  
 H 12.214094593 5.880324607 29.571523779  
 H 8.887806980 6.580897078 30.639924010  
 H 8.246789208 4.733868597 29.943715607  
 H 8.654720049 8.975798249 30.121957789  
 H 8.047982627 7.959268114 29.141638975  
 H 11.759059220 4.429411557 29.492118608  
 O 4.876905332 4.328574083 29.311136829  
 H 5.835544439 4.276497102 29.571644185  
 H 7.908168533 3.206959957 29.519314826  
 H 2.519825354 2.640923637 29.560689889  
 H 1.384216960 1.448276109 29.776442506  
 End final coordinates

*NH<sub>3</sub>-Cu111-Nafion*

CELL\_PARAMETERS (angstrom)  
 15.346059799 0.000000000 0.000000000  
 -7.673035145 13.290086719 0.000000000  
 0.000000000 0.000000000 50.000000000

ATOMIC\_POSITIONS (angstrom)  
 Cu -0.000007673 1.476683389 22.979020887 0 0 0  
 Cu -1.278852374 3.691708473 22.979020887 0 0 0  
 Cu -2.557700144 5.906735091 22.979020887 0 0 0  
 Cu -3.836544845 8.121760175 22.979020887 0 0 0  
 Cu -5.115392615 10.336788328 22.979020887 0 0 0  
 Cu -6.394237316 12.551816481 22.979020887 0 0 0  
 Cu 2.557681729 1.476683389 22.979020887 0 0 0  
 Cu 1.278833959 3.691708473 22.979020887 0 0 0  
 Cu -0.000009208 5.906735091 22.979020887 0 0 0  
 Cu -1.278853909 8.121760175 22.979020887 0 0 0  
 Cu -2.557701679 10.336788328 22.979020887 0 0 0  
 Cu -3.836546380 12.551816481 22.979020887 0 0 0  
 Cu 5.115372665 1.476683389 22.979020887 0 0 0  
 Cu 3.836524895 3.691708473 22.979020887 0 0 0  
 Cu 2.557680194 5.906735091 22.979020887 0 0 0  
 Cu 1.278832424 8.121760175 22.979020887 0 0 0  
 Cu -0.000012277 10.336788328 22.979020887 0 0 0  
 Cu -1.278856978 12.551816481 22.979020887 0 0 0  
 Cu 7.673062067 1.476683389 22.979020887 0 0 0  
 Cu 6.394215831 3.691708473 22.979020887 0 0 0  
 Cu 5.115371131 5.906735091 22.979020887 0 0 0  
 Cu 3.836523360 8.121760175 22.979020887 0 0 0  
 Cu 2.557678660 10.336788328 22.979020887 0 0 0  
 Cu 1.278830889 12.551816481 22.979020887 0 0 0  
 Cu 10.230753003 1.476683389 22.979020887 0 0 0  
 Cu 8.951905233 3.691708473 22.979020887 0 0 0  
 Cu 7.673062067 5.906735091 22.979020887 0 0 0  
 Cu 6.394214297 8.121760175 22.979020887 0 0 0  
 Cu 5.115369596 10.336788328 22.979020887 0 0 0  
 Cu 3.836521826 12.551816481 22.979020887 0 0 0  
 Cu 12.788443940 1.476683389 22.979020887 0 0 0  
 Cu 11.509596170 3.691708473 22.979020887 0 0 0  
 Cu 10.230751469 5.906735091 22.979020887 0 0 0  
 Cu 8.951905233 8.121760175 22.979020887 0 0 0  
 Cu 7.673060532 10.336788328 22.979020887 0 0 0  
 Cu 6.394212762 12.551816481 22.979020887 0 0 0  
 N 1.482074750 2.486248122 29.357139388  
 H 0.839597353 3.175108317 29.766747075  
 Cu 1.281879293 0.775030542 25.070414844  
 Cu 0.018458278 2.947844194 25.055297607  
 Cu -1.291099216 5.183902492 25.022461428  
 Cu -2.558553131 7.386973172 25.038200311  
 Cu -3.841877535 9.606744801 25.020747882

Cu -5.118576885 11.824679989 25.020532239  
 Cu 3.838690472 0.740005099 25.014229898  
 Cu 2.545388297 2.953030814 25.045722545  
 Cu 1.272022862 5.191012396 25.025014342  
 Cu -0.009167566 7.383379770 25.055539259  
 Cu -1.288233843 9.602342112 25.020506520  
 Cu -2.561151027 11.816372820 25.024286415  
 Cu 6.393192029 0.737986397 25.019788830  
 Cu 5.121146423 2.977119345 25.040524447  
 Cu 3.862062344 5.185820881 25.068325822  
 Cu 2.561934906 7.377283439 25.066350814  
 Cu 1.273949447 9.598191026 25.016346498  
 Cu -0.002318412 11.813189556 25.023022834  
 Cu 8.952699094 0.736620355 25.023140744  
 Cu 7.675915473 2.949287436 25.009124341  
 Cu 6.381782587 5.167701147 25.041628618  
 Cu 5.105483036 7.383584287 25.042261003  
 Cu 3.836983439 9.606361961 25.011057401  
 Cu 2.558577201 11.813764640 25.023865944  
 Cu 11.510827759 0.741280145 25.028753003  
 Cu 10.230753879 2.950153628 25.018277456  
 Cu 8.953973346 5.173402269 24.999359601  
 Cu 7.673048521 7.390913719 24.999116737  
 Cu 6.399931674 9.614271187 25.002163110  
 Cu 5.118177088 11.822273045 25.024867973  
 Cu 14.069718157 0.744045217 25.026265975  
 Cu 12.788118183 2.951714017 25.010599453  
 Cu 11.498493548 5.173018442 25.010276309  
 Cu 10.227192653 7.395647094 25.010066672  
 Cu 8.955982728 9.613793313 25.011755533  
 Cu 7.677968698 11.828406079 25.023930929  
 Cu -0.006515099 0.006945322 27.070095825  
 Cu -1.303670954 2.222203471 27.061891558  
 Cu -2.585413755 4.419183840 27.028752345  
 Cu -3.874059678 6.645067133 27.051368178  
 Cu -5.126818305 8.867677585 27.067217713  
 Cu -6.394581220 11.086620596 27.073728588  
 Cu 2.570538273 -0.004650780 27.063874039  
 Cu 1.283766457 2.251836399 27.251809052  
 Cu -0.033609311 4.452228059 27.025428155  
 Cu -1.328265943 6.655074657 27.120071374  
 Cu -2.580765776 8.879530489 27.065513215  
 Cu -3.844758763 11.082407449 27.074735636  
 Cu 5.120472096 0.002758759 27.071999041  
 Cu 3.862709601 2.195700330 27.025192551  
 Cu 2.545166101 4.464988587 27.006111172  
 Cu 1.256966520 6.664378033 27.112493133  
 Cu -0.014556126 8.900632892 27.051659133  
 Cu -1.287689559 11.084744290 27.072558733  
 Cu 7.677823655 -0.002151145 27.071440250  
 Cu 6.429427551 2.199240700 27.059747969  
 Cu 5.135494545 4.413618452 27.167936416  
 Cu 3.857373434 6.692946551 27.161591543  
 Cu 2.558843904 8.913854974 27.044227115  
 Cu 1.277575064 11.089377518 27.072572993  
 Cu 10.232049869 0.004093107 27.069450088  
 Cu 8.954418241 2.218000023 27.074271322  
 Cu 7.698485901 4.432363710 27.020078715  
 Cu 6.437531578 6.668417121 27.047154163  
 Cu 5.137091321 8.901172333 27.024880858  
 Cu 3.846720921 11.089573270 27.077060838  
 Cu 12.789459365 0.009148525 27.077315370  
 Cu 11.499753052 2.220915375 27.080597195  
 Cu 10.218832659 4.428021290 27.062799008  
 Cu 8.949578564 6.647067306 27.042857152  
 Cu 7.676537059 8.880588206 27.029602787

Cu 6.401292731 11.090100905 27.077086120  
 O 0.168293313 5.269067100 31.033447202  
 S -0.038590597 6.501793143 30.282166633  
 C -0.174990922 7.941120901 31.518212655  
 C -1.321188386 7.838401208 32.576958769  
 O -1.065277656 6.739675041 33.380494340  
 C -1.709953146 6.595416301 34.603518864  
 F -1.179314459 7.405406862 35.543734822  
 F -3.035614772 6.849878025 34.526594822  
 F -1.525986607 5.321048639 34.977000930  
 F -1.367327119 8.998302185 33.293604276  
 F -2.526290516 7.718732989 31.941879497  
 F -0.389978863 9.071567987 30.793465206  
 F 1.011622993 8.056947683 32.173641038  
 O -1.324721179 6.590997587 29.531453523  
 O 1.121015431 6.948099780 29.456826406  
 O 3.861641873 6.793391608 29.410213900  
 H 2.909653971 6.908055357 29.652348701  
 H 4.608936132 5.251715146 29.575622702  
 H 4.380798033 7.597261675 29.725130722  
 O 5.385063564 8.858889638 30.203575254  
 H 5.350137393 9.548474779 29.504859918  
 H 6.329078146 8.586104341 30.227064428  
 O 11.740054646 5.169015413 30.135451674  
 O 9.504863893 5.778272322 30.945417867  
 O 8.265331210 7.927685863 30.051665918  
 O 7.884243843 3.837623983 30.160586560  
 H 10.527771449 5.595073030 30.560041137  
 H 12.522017555 5.781040620 30.061682518  
 H 9.091671269 6.642316825 30.597998146  
 H 8.899637083 5.010537914 30.666054357  
 H 8.829991883 8.723648253 29.962219338  
 H 8.102484867 7.687381024 29.091132233  
 H 11.642091492 4.800729416 29.218935528  
 H 8.083679020 3.665880047 29.194883297  
 O 4.957117036 4.338360473 29.374667106  
 H 5.860626614 4.273227629 29.750935879  
 H 7.972309715 2.963105825 30.584672979  
 H 2.434567322 2.788778235 29.587433412  
 H 1.322176140 1.587103974 29.820606716  
 End final coordinates

First protonation on Zn(111) surfaces

*NO-Eigen-Zn111*

CELL\_PARAMETERS (angstrom)  
 15.967919350 0.000000000 0.000000000  
 -7.983965199 13.828620613 0.000000000  
 0.000000000 0.000000000 39.353633881

ATOMIC\_POSITIONS (angstrom)

Zn 1.099035447 0.588204010 22.686877592 0 0 0  
 Zn -0.231625908 2.892974167 22.686877592 0 0 0  
 Zn -1.562287263 5.197744323 22.686877592 0 0 0  
 Zn -2.892948618 7.502516077 22.686877592 0 0 0  
 Zn -4.223609973 9.807286233 22.686877592 0 0 0  
 Zn -5.554269732 12.112056390 22.686877592 0 0 0  
 Zn 3.760356561 0.588204010 22.686877592 0 0 0  
 Zn 2.429695206 2.892974167 22.686877592 0 0 0  
 Zn 1.099033851 5.197744323 22.686877592 0 0 0  
 Zn -0.231627505 7.502516077 22.686877592 0 0 0  
 Zn -1.562288860 9.807286233 22.686877592 0 0 0  
 Zn -2.892950215 12.112056390 22.686877592 0 0 0  
 Zn 6.421677675 0.588204010 22.686877592 0 0 0  
 Zn 5.091016320 2.892974167 22.686877592 0 0 0



|    |              |              |              |   |   |   |    |              |              |              |  |  |  |
|----|--------------|--------------|--------------|---|---|---|----|--------------|--------------|--------------|--|--|--|
| Zn | 3.760354964  | 5.197744323  | 22.686877592 | 0 | 0 | 0 | Zn | 1.068691001  | 5.236139824  | 27.899955076 |  |  |  |
| Zn | 2.429693609  | 7.502516077  | 22.686877592 | 0 | 0 | 0 | Zn | -0.265766608 | 7.505274664  | 27.989092525 |  |  |  |
| Zn | 1.099032254  | 9.807286233  | 22.686877592 | 0 | 0 | 0 | Zn | -1.562350353 | 9.784259841  | 28.024074459 |  |  |  |
| Zn | -0.231629101 | 12.112056390 | 22.686877592 | 0 | 0 | 0 | Zn | -2.882858498 | 12.053863283 | 28.014491596 |  |  |  |
| Zn | 9.082997192  | 0.588204010  | 22.686877592 | 0 | 0 | 0 | Zn | 6.425006218  | 0.538233034  | 28.004606177 |  |  |  |
| Zn | 7.752335837  | 2.892974167  | 22.686877592 | 0 | 0 | 0 | Zn | 5.127251340  | 2.844500032  | 27.972566525 |  |  |  |
| Zn | 6.421674481  | 5.197744323  | 22.686877592 | 0 | 0 | 0 | Zn | 3.752803884  | 5.207486078  | 27.848442074 |  |  |  |
| Zn | 5.091013126  | 7.502516077  | 22.686877592 | 0 | 0 | 0 | Zn | 2.407522931  | 7.527306631  | 27.907663059 |  |  |  |
| Zn | 3.760351771  | 9.807286233  | 22.686877592 | 0 | 0 | 0 | Zn | 1.077936878  | 9.789411936  | 28.098389787 |  |  |  |
| Zn | 2.429690416  | 12.112056390 | 22.686877592 | 0 | 0 | 0 | Zn | -0.241472478 | 12.066322068 | 28.099532265 |  |  |  |
| Zn | 11.744318305 | 0.588204010  | 22.686877592 | 0 | 0 | 0 | Zn | 9.061639351  | 0.519472827  | 28.055121893 |  |  |  |
| Zn | 10.413656950 | 2.892974167  | 22.686877592 | 0 | 0 | 0 | Zn | 7.746349820  | 2.848158487  | 27.961565143 |  |  |  |
| Zn | 9.082995595  | 5.197744323  | 22.686877592 | 0 | 0 | 0 | Zn | 6.400529227  | 5.166831381  | 27.739295661 |  |  |  |
| Zn | 7.752334240  | 7.502516077  | 22.686877592 | 0 | 0 | 0 | Zn | 5.062351890  | 7.504770928  | 27.798079723 |  |  |  |
| Zn | 6.421672885  | 9.807286233  | 22.686877592 | 0 | 0 | 0 | Zn | 3.703161592  | 9.759643725  | 28.495078802 |  |  |  |
| Zn | 5.091011529  | 12.112056390 | 22.686877592 | 0 | 0 | 0 | Zn | 2.387440022  | 12.047203432 | 28.143867591 |  |  |  |
| Zn | 14.405637822 | 0.588204010  | 22.686877592 | 0 | 0 | 0 | Zn | 11.684655659 | 0.530217958  | 28.067753330 |  |  |  |
| Zn | 13.074978064 | 2.892974167  | 22.686877592 | 0 | 0 | 0 | Zn | 10.364919945 | 2.847414964  | 27.998908445 |  |  |  |
| Zn | 11.744316709 | 5.197744323  | 22.686877592 | 0 | 0 | 0 | Zn | 9.049320837  | 5.163350746  | 27.955611196 |  |  |  |
| Zn | 10.413655353 | 7.502516077  | 22.686877592 | 0 | 0 | 0 | Zn | 7.728910186  | 7.457213306  | 27.946966216 |  |  |  |
| Zn | 9.082993998  | 9.807286233  | 22.686877592 | 0 | 0 | 0 | Zn | 6.338308260  | 9.747304793  | 27.900065799 |  |  |  |
| Zn | 7.752332643  | 12.112056390 | 22.686877592 | 0 | 0 | 0 | Zn | 4.997437501  | 12.021057764 | 28.002934420 |  |  |  |
| Zn | -0.258265705 | 1.319772147  | 25.678271638 |   |   |   | Zn | 14.324558710 | 0.508172041  | 28.020045308 |  |  |  |
| Zn | -1.595465512 | 3.629237772  | 25.351834162 |   |   |   | Zn | 12.981933427 | 2.838202566  | 28.039547048 |  |  |  |
| Zn | -2.897149252 | 5.946776730  | 25.316443398 |   |   |   | Zn | 11.717014844 | 5.150541880  | 27.844218064 |  |  |  |
| Zn | -4.225020925 | 8.250421108  | 25.295965200 |   |   |   | Zn | 10.375719271 | 7.465918354  | 27.917962341 |  |  |  |
| Zn | -5.553270854 | 10.558006401 | 25.330972316 |   |   |   | Zn | 9.066793405  | 9.757505405  | 27.780445175 |  |  |  |
| Zn | -6.906936060 | 12.853470665 | 25.380987009 |   |   |   | Zn | 7.654245747  | 11.991835410 | 28.033703731 |  |  |  |
| Zn | 2.402352568  | 1.321211404  | 25.604930580 |   |   |   | N  | 1.095638732  | 2.078603427  | 29.392092022 |  |  |  |
| Zn | 1.067533470  | 3.620216800  | 25.575664960 |   |   |   | O  | 1.131305457  | 2.234792786  | 30.637405494 |  |  |  |
| Zn | -0.259401993 | 5.919826392  | 25.308716398 |   |   |   | H  | 3.538762141  | 6.168451158  | 31.420164386 |  |  |  |
| Zn | -1.571004582 | 8.250868991  | 25.310225087 |   |   |   | O  | 3.790794674  | 9.516823777  | 30.662714015 |  |  |  |
| Zn | -2.904086903 | 10.554409212 | 25.325488017 |   |   |   | H  | 3.989723950  | 8.585578574  | 30.904773233 |  |  |  |
| Zn | -4.255135448 | 12.856243554 | 25.362134956 |   |   |   | H  | 4.528309484  | 10.085232312 | 31.034160052 |  |  |  |
| Zn | 5.065504311  | 1.332207874  | 25.318511461 |   |   |   | O  | 5.781033752  | 11.149995293 | 31.467199207 |  |  |  |
| Zn | 3.748224606  | 3.628937548  | 25.312516774 |   |   |   | H  | 5.803761440  | 11.821383576 | 30.757144265 |  |  |  |
| Zn | 2.406278644  | 5.922906840  | 25.304430455 |   |   |   | H  | 6.633078811  | 10.668438483 | 31.375174708 |  |  |  |
| Zn | 1.077445284  | 8.232386577  | 25.361234383 |   |   |   | O  | 10.759946429 | 6.173668359  | 31.021356497 |  |  |  |
| Zn | -0.249672013 | 10.553138344 | 25.365394819 |   |   |   | O  | 8.495125774  | 7.034167458  | 31.867094959 |  |  |  |
| Zn | -1.593005782 | 12.861320595 | 25.367706032 |   |   |   | O  | 8.115171174  | 9.489660915  | 30.942196225 |  |  |  |
| Zn | 7.740981088  | 1.314075219  | 25.314720834 |   |   |   | O  | 6.724428203  | 5.466524768  | 31.139430943 |  |  |  |
| Zn | 6.416039562  | 3.605253748  | 25.309051117 |   |   |   | H  | 9.416695522  | 6.705993991  | 31.525484318 |  |  |  |
| Zn | 5.059050922  | 5.952182251  | 25.282373527 |   |   |   | H  | 11.455364830 | 6.840972148  | 30.861108874 |  |  |  |
| Zn | 3.727557191  | 8.266196206  | 25.296770936 |   |   |   | H  | 8.344452039  | 7.973162782  | 31.517558083 |  |  |  |
| Zn | 2.415635356  | 10.553197201 | 25.376938876 |   |   |   | H  | 7.705389246  | 6.362502619  | 31.522999288 |  |  |  |
| Zn | 1.082183306  | 12.851294899 | 25.369774781 |   |   |   | H  | 8.936832272  | 10.017928054 | 30.888717849 |  |  |  |
| Zn | 10.398920904 | 1.311980056  | 25.326343333 |   |   |   | H  | 7.877044361  | 9.364545667  | 29.979395299 |  |  |  |
| Zn | 9.072355325  | 3.612998385  | 25.299379071 |   |   |   | H  | 10.627409043 | 5.773880874  | 30.124353189 |  |  |  |
| Zn | 7.734457903  | 5.934533387  | 25.281894086 |   |   |   | H  | 6.902236145  | 5.119841560  | 30.233747695 |  |  |  |
| Zn | 6.391265072  | 8.258836799  | 25.283564824 |   |   |   | O  | 4.257087384  | 6.647101948  | 30.967210589 |  |  |  |
| Zn | 5.056318898  | 10.561002622 | 25.332453238 |   |   |   | H  | 5.811440970  | 5.872620728  | 31.095160776 |  |  |  |
| Zn | 3.752173817  | 12.862372462 | 25.439077284 |   |   |   | H  | 4.048732535  | 6.550388639  | 29.998084583 |  |  |  |
| Zn | 13.062027180 | 1.330644633  | 25.347946591 |   |   |   |    |              |              |              |  |  |  |
| Zn | 11.722373122 | 3.607052147  | 25.338654210 |   |   |   |    |              |              |              |  |  |  |
| Zn | 10.409170791 | 5.931971874  | 25.309067259 |   |   |   |    |              |              |              |  |  |  |
| Zn | 9.066723566  | 8.254442874  | 25.311351158 |   |   |   |    |              |              |              |  |  |  |
| Zn | 7.714618633  | 10.562576645 | 25.345308731 |   |   |   |    |              |              |              |  |  |  |
| Zn | 6.411208399  | 12.861784083 | 25.383127859 |   |   |   |    |              |              |              |  |  |  |
| Zn | 1.053399726  | 0.270190734  | 28.376819213 |   |   |   |    |              |              |              |  |  |  |
| Zn | -0.417204591 | 2.950405327  | 28.145550710 |   |   |   |    |              |              |              |  |  |  |
| Zn | -1.614972008 | 5.218822639  | 27.996445969 |   |   |   |    |              |              |              |  |  |  |
| Zn | -2.927321047 | 7.480198031  | 27.962930109 |   |   |   |    |              |              |              |  |  |  |
| Zn | -4.226482296 | 9.745520858  | 27.993741170 |   |   |   |    |              |              |              |  |  |  |
| Zn | -5.527673535 | 12.002170592 | 28.024749401 |   |   |   |    |              |              |              |  |  |  |
| Zn | 3.767145059  | 0.521892579  | 27.966544792 |   |   |   |    |              |              |              |  |  |  |
| Zn | 2.549838239  | 2.952025603  | 28.085336468 |   |   |   |    |              |              |              |  |  |  |

  

|    |              |              |              |  |  |  |  |  |  |  |  |  |  |
|----|--------------|--------------|--------------|--|--|--|--|--|--|--|--|--|--|
| Zn | 1.068691001  | 5.236139824  | 27.899955076 |  |  |  |  |  |  |  |  |  |  |
| Zn | -0.265766608 | 7.505274664  | 27.989092525 |  |  |  |  |  |  |  |  |  |  |
| Zn | -1.562350353 | 9.784259841  | 28.024074459 |  |  |  |  |  |  |  |  |  |  |
| Zn | -2.882858498 | 12.053863283 | 28.014491596 |  |  |  |  |  |  |  |  |  |  |
| Zn | 6.425006218  | 0.538233034  | 28.004606177 |  |  |  |  |  |  |  |  |  |  |
| Zn | 5.127251340  | 2.844500032  | 27.972566525 |  |  |  |  |  |  |  |  |  |  |
| Zn | 3.752803884  | 5.207486078  | 27.848442074 |  |  |  |  |  |  |  |  |  |  |
| Zn | 2.407522931  | 7.527306631  | 27.907663059 |  |  |  |  |  |  |  |  |  |  |
| Zn | 1.077936878  | 9.789411936  | 28.098389787 |  |  |  |  |  |  |  |  |  |  |
| Zn | -0.241472478 | 12.066322068 | 28.099532265 |  |  |  |  |  |  |  |  |  |  |
| Zn | 9.061639351  | 0.519472827  | 28.055121893 |  |  |  |  |  |  |  |  |  |  |
| Zn | 7.746349820  | 2.848158487  | 27.961565143 |  |  |  |  |  |  |  |  |  |  |
| Zn | 6.400529227  | 5.166831381  | 27.739295661 |  |  |  |  |  |  |  |  |  |  |
| Zn | 5.062351890  | 7.504770928  | 27.798079723 |  |  |  |  |  |  |  |  |  |  |
| Zn | 3.703161592  | 9.759643725  | 28.495078802 |  |  |  |  |  |  |  |  |  |  |
| Zn | 2.387440022  | 12.047203432 | 28.143867591 |  |  |  |  |  |  |  |  |  |  |
| Zn | 11.684655659 | 0.530217958  | 28.067753330 |  |  |  |  |  |  |  |  |  |  |
| Zn | 10.364919945 | 2.847414964  | 27.998908445 |  |  |  |  |  |  |  |  |  |  |
| Zn | 9.049320837  | 5.163350746  | 27.955611196 |  |  |  |  |  |  |  |  |  |  |
| Zn | 7.728910186  | 7.457213306  | 27.946966216 |  |  |  |  |  |  |  |  |  |  |
| Zn | 6.338308260  | 9.747304793  | 27.900065799 |  |  |  |  |  |  |  |  |  |  |
| Zn | 4.997437501  | 12.021057764 | 28.002934420 |  |  |  |  |  |  |  |  |  |  |
| Zn | 14.324558710 | 0.508172041  | 28.020045308 |  |  |  |  |  |  |  |  |  |  |
| Zn | 12.981933427 | 2.838202566  | 28.039547048 |  |  |  |  |  |  |  |  |  |  |
| Zn | 11.717014844 | 5.150541880  | 27.844218064 |  |  |  |  |  |  |  |  |  |  |
| Zn | 10.375719271 | 7.465918354  | 27.917962341 |  |  |  |  |  |  |  |  |  |  |
| Zn | 9.066793405  | 9.757505405  | 27.780445175 |  |  |  |  |  |  |  |  |  |  |
| Zn | 7.654245747  | 11.991835410 | 28.033703731 |  |  |  |  |  |  |  |  |  |  |
| N  | 1.095638732  | 2.078603427  | 29.392092022 |  |  |  |  |  |  |  |  |  |  |
| O  | 1.131305457  | 2.234792786  | 30.637405494 |  |  |  |  |  |  |  |  |  |  |
| H  | 3.538762141  | 6.168451158  | 31.420164386 |  |  |  |  |  |  |  |  |  |  |
| O  | 3.790794674  | 9.516823777  | 30.662714015 |  |  |  |  |  |  |  |  |  |  |
| H  | 3.989723950  | 8.585578574  | 30.904773233 |  |  |  |  |  |  |  |  |  |  |
| H  | 4.528309484  | 10.085232312 | 31.034160052 |  |  |  |  |  |  |  |  |  |  |
| O  | 5.781033752  | 11.149995293 | 31.467199207 |  |  |  |  |  |  |  |  |  |  |
| H  | 5.803761440  | 11.821383576 |              |  |  |  |  |  |  |  |  |  |  |

|    |              |              |              |   |   |   |    |              |               |              |
|----|--------------|--------------|--------------|---|---|---|----|--------------|---------------|--------------|
| Zn | -5.554269732 | 12.112056390 | 22.686877592 | 0 | 0 | 0 | Zn | 6.447080390  | 12.888413167  | 25.344280165 |
| Zn | 3.760356561  | 0.588204010  | 22.686877592 | 0 | 0 | 0 | Zn | 1.108360208  | 0.350082035   | 28.273695007 |
| Zn | 2.429695206  | 2.892974167  | 22.686877592 | 0 | 0 | 0 | Zn | -0.375441230 | 2.978645296   | 28.157035084 |
| Zn | 1.099033851  | 5.197744323  | 22.686877592 | 0 | 0 | 0 | Zn | -1.570098783 | 5.255852141   | 28.018655673 |
| Zn | -0.231627505 | 7.502516077  | 22.686877592 | 0 | 0 | 0 | Zn | -2.872031035 | 7.518070793   | 27.998346171 |
| Zn | -1.562288860 | 9.807286233  | 22.686877592 | 0 | 0 | 0 | Zn | -4.162656315 | 9.776430749   | 28.063887469 |
| Zn | -2.892950215 | 12.112056390 | 22.686877592 | 0 | 0 | 0 | Zn | -5.478605757 | 12.0378777837 | 28.071419814 |
| Zn | 6.421677675  | 0.588204010  | 22.686877592 | 0 | 0 | 0 | Zn | 3.826938677  | 0.539394702   | 27.999557712 |
| Zn | 5.091016320  | 2.892974167  | 22.686877592 | 0 | 0 | 0 | Zn | 2.641196997  | 2.998212962   | 28.184843420 |
| Zn | 3.760354964  | 5.197744323  | 22.686877592 | 0 | 0 | 0 | Zn | 1.104128112  | 5.250421008   | 27.928805098 |
| Zn | 2.429693609  | 7.502516077  | 22.686877592 | 0 | 0 | 0 | Zn | -0.220255544 | 7.544557391   | 27.961408573 |
| Zn | 1.099032254  | 9.807286233  | 22.686877592 | 0 | 0 | 0 | Zn | -1.516427999 | 9.796854093   | 28.346808078 |
| Zn | -0.231629101 | 12.112056390 | 22.686877592 | 0 | 0 | 0 | Zn | -2.831418781 | 12.067005962  | 28.117636181 |
| Zn | 9.082997192  | 0.588204010  | 22.686877592 | 0 | 0 | 0 | Zn | 6.473862466  | 0.554771414   | 28.069582799 |
| Zn | 7.752335837  | 2.892974167  | 22.686877592 | 0 | 0 | 0 | Zn | 5.191039428  | 2.869100093   | 27.993161593 |
| Zn | 6.421674481  | 5.197744323  | 22.686877592 | 0 | 0 | 0 | Zn | 3.807539759  | 5.240839074   | 27.822282518 |
| Zn | 5.091013126  | 7.502516077  | 22.686877592 | 0 | 0 | 0 | Zn | 2.437520277  | 7.539458135   | 27.927054064 |
| Zn | 3.760351771  | 9.807286233  | 22.686877592 | 0 | 0 | 0 | Zn | 1.119501990  | 9.816651422   | 28.257194249 |
| Zn | 2.429690416  | 12.112056390 | 22.686877592 | 0 | 0 | 0 | Zn | -0.201037409 | 12.078726879  | 28.155496122 |
| Zn | 11.744318305 | 0.588204010  | 22.686877592 | 0 | 0 | 0 | Zn | 9.093284745  | 0.549282751   | 28.069408791 |
| Zn | 10.413656950 | 2.892974167  | 22.686877592 | 0 | 0 | 0 | Zn | 7.796735340  | 2.874868479   | 27.998550641 |
| Zn | 9.082995595  | 5.197744323  | 22.686877592 | 0 | 0 | 0 | Zn | 6.459043957  | 5.189879594   | 27.749953877 |
| Zn | 7.752334240  | 7.502516077  | 22.686877592 | 0 | 0 | 0 | Zn | 5.124867761  | 7.522827374   | 27.863822458 |
| Zn | 6.421672885  | 9.807286233  | 22.686877592 | 0 | 0 | 0 | Zn | 3.734073945  | 9.816462096   | 27.935311625 |
| Zn | 5.091011529  | 12.112056390 | 22.686877592 | 0 | 0 | 0 | Zn | 2.420333764  | 12.094153070  | 28.115145574 |
| Zn | 14.405637822 | 0.588204010  | 22.686877592 | 0 | 0 | 0 | Zn | 11.720944533 | 0.569592248   | 28.013789441 |
| Zn | 13.074978064 | 2.892974167  | 22.686877592 | 0 | 0 | 0 | Zn | 10.409353005 | 2.880612534   | 27.980314526 |
| Zn | 11.744316709 | 5.197744323  | 22.686877592 | 0 | 0 | 0 | Zn | 9.107712914  | 5.195010211   | 27.987696940 |
| Zn | 10.413655353 | 7.502516077  | 22.686877592 | 0 | 0 | 0 | Zn | 7.788117072  | 7.484115462   | 27.940880253 |
| Zn | 9.082993998  | 9.807286233  | 22.686877592 | 0 | 0 | 0 | Zn | 6.415263268  | 9.785595945   | 27.827671656 |
| Zn | 7.752332643  | 12.112056390 | 22.686877592 | 0 | 0 | 0 | Zn | 5.066750535  | 12.102501141  | 27.914806467 |
| Zn | -0.219776564 | 1.351841934  | 25.611020217 |   |   |   | Zn | 14.378048903 | 0.561022072   | 27.968789695 |
| Zn | -1.564732493 | 3.660268449  | 25.343415720 |   |   |   | Zn | 13.026164840 | 2.877286339   | 28.006378108 |
| Zn | -2.869522384 | 5.976324249  | 25.325699166 |   |   |   | Zn | 11.764312209 | 5.192595460   | 27.859698110 |
| Zn | -4.192594545 | 8.276564219  | 25.324990851 |   |   |   | Zn | 10.434196393 | 7.501787721   | 27.954528535 |
| Zn | -5.514254448 | 10.581380979 | 25.356009919 |   |   |   | Zn | 9.134612193  | 9.791543947   | 27.822281079 |
| Zn | -6.869404032 | 12.872866337 | 25.365788847 |   |   |   | Zn | 7.722812037  | 12.039614450  | 28.012780994 |
| Zn | 2.441942270  | 1.343361186  | 25.664650182 |   |   |   | N  | 1.157062959  | 2.130355884   | 29.401228571 |
| Zn | 1.104174975  | 3.645831967  | 25.597873389 |   |   |   | O  | 1.139413407  | 2.194877196   | 30.654650591 |
| Zn | -0.234540829 | 5.947064053  | 25.326659696 |   |   |   | H  | 3.428189601  | 5.754492672   | 31.290527110 |
| Zn | -1.550669902 | 8.279972988  | 25.329006469 |   |   |   | O  | 0.058803980  | 8.243569206   | 32.578499722 |
| Zn | -2.873222036 | 10.576813775 | 25.350439107 |   |   |   | S  | -0.075664058 | 9.309479646   | 31.600071672 |
| Zn | -4.220352408 | 12.875232178 | 25.374053454 |   |   |   | C  | -0.160418016 | 10.941384534  | 32.558269354 |
| Zn | 5.095653786  | 1.346468513  | 25.364298558 |   |   |   | C  | -1.486909531 | 11.197339044  | 33.341995911 |
| Zn | 3.776046186  | 3.644807610  | 25.324965955 |   |   |   | O  | -1.749068030 | 10.067346176  | 34.105698823 |
| Zn | 2.429356972  | 5.945857176  | 25.320830764 |   |   |   | C  | -2.651814515 | 10.115064947  | 35.155742623 |
| Zn | 1.093765465  | 8.257969062  | 25.346532783 |   |   |   | F  | -2.100750773 | 10.657910708  | 36.260551930 |
| Zn | -0.233370243 | 10.570527481 | 25.359920254 |   |   |   | F  | -3.770846881 | 10.814733156  | 34.854722744 |
| Zn | -1.567142502 | 12.874295692 | 25.424494390 |   |   |   | F  | -2.990614290 | 8.843641014   | 35.423049057 |
| Zn | 7.762481512  | 1.331354999  | 25.314138446 |   |   |   | F  | -1.339640723 | 12.312706043  | 34.114856069 |
| Zn | 6.443463772  | 3.622964535  | 25.315851492 |   |   |   | F  | -2.499062732 | 11.448135360  | 32.467704096 |
| Zn | 5.089847819  | 5.972422061  | 25.291300168 |   |   |   | F  | -0.004145108 | 11.968552919  | 31.674995726 |
| Zn | 3.751744620  | 8.278401557  | 25.286465156 |   |   |   | F  | 0.879021271  | 10.965198600  | 33.437643874 |
| Zn | 2.424843652  | 10.577601444 | 25.346526444 |   |   |   | O  | -1.283986779 | 9.318906845   | 30.758740510 |
| Zn | 1.101421357  | 12.872745151 | 25.374175228 |   |   |   | O  | 1.184087692  | 9.540671542   | 30.790803110 |
| Zn | 10.420035056 | 1.340750954  | 25.316522436 |   |   |   | O  | 3.406909802  | 8.896646333   | 31.798784415 |
| Zn | 9.098166789  | 3.636476454  | 25.308192832 |   |   |   | H  | 2.473599193  | 9.170515231   | 31.399262516 |
| Zn | 7.769860324  | 5.954552017  | 25.300287543 |   |   |   | H  | 3.630192100  | 7.958223666   | 31.505882485 |
| Zn | 6.426267329  | 8.276994325  | 25.268195852 |   |   |   | H  | 4.175641768  | 9.559972810   | 31.497368533 |
| Zn | 5.088034219  | 10.585165270 | 25.291860066 |   |   |   | O  | 5.231165726  | 10.488576685  | 31.125944192 |
| Zn | 3.776608665  | 12.891267089 | 25.371067716 |   |   |   | H  | 5.112252784  | 10.776900409  | 30.188452877 |
| Zn | 13.091549860 | 1.365461861  | 25.323895355 |   |   |   | H  | 6.150208950  | 10.127153156  | 31.158741965 |
| Zn | 11.749616158 | 3.639802294  | 25.335348398 |   |   |   | O  | 10.789671432 | 6.233806442   | 31.109702290 |
| Zn | 10.441272821 | 5.956099739  | 25.316624160 |   |   |   | O  | 8.501300105  | 7.025097281   | 31.899374039 |
| Zn | 9.106461515  | 8.276335680  | 25.318790259 |   |   |   | O  | 7.884292800  | 9.428958582   | 30.961443094 |
| Zn | 7.757414158  | 10.584457441 | 25.335319344 |   |   |   | O  | 6.736744037  | 5.439787946   | 31.128360924 |

H 9.446895810 6.727293292 31.575790483  
H 11.579187160 6.791880009 31.236127608  
H 8.306865082 7.955516303 31.552555989  
H 7.739526803 6.350047358 31.552114592  
H 8.536002040 10.144062135 31.099850085  
H 7.874299641 9.314994081 29.966161330  
H 10.773996151 6.033587342 30.138646407  
H 6.917313553 5.119535243 30.212041692  
O 4.064263005 6.434290592 30.993394877  
H 5.810469382 5.791157583 31.104778018  
H 3.943549099 6.469751903 30.000581935  
End final coordinates

NOH-Zn111

CELL\_PARAMETERS (angstrom)

15.967919350 0.000000000 0.000000000  
-7.983965199 13.828620613 0.000000000  
0.000000000 0.000000000 39.353633881

ATOMIC\_POSITIONS (angstrom)

Zn 1.099035447 0.588204010 22.686877592 0 0 0  
Zn -0.231625908 2.892974167 22.686877592 0 0 0  
Zn -1.562287263 5.197744323 22.686877592 0 0 0  
Zn -2.892948618 7.502516077 22.686877592 0 0 0  
Zn -4.223609973 9.807286233 22.686877592 0 0 0  
Zn -5.554269732 12.112056390 22.686877592 0 0 0  
Zn 3.760356561 0.588204010 22.686877592 0 0 0  
Zn 2.429695206 2.892974167 22.686877592 0 0 0  
Zn 1.099033851 5.197744323 22.686877592 0 0 0  
Zn -0.231627505 7.502516077 22.686877592 0 0 0  
Zn -1.562288860 9.807286233 22.686877592 0 0 0  
Zn -2.892950215 12.112056390 22.686877592 0 0 0  
Zn 6.421677675 0.588204010 22.686877592 0 0 0  
Zn 5.091016320 2.892974167 22.686877592 0 0 0  
Zn 3.760354964 5.197744323 22.686877592 0 0 0  
Zn 2.429693609 7.502516077 22.686877592 0 0 0  
Zn 1.099032254 9.807286233 22.686877592 0 0 0  
Zn -0.231629101 12.112056390 22.686877592 0 0 0  
Zn 9.082997192 0.588204010 22.686877592 0 0 0  
Zn 7.752335837 2.892974167 22.686877592 0 0 0  
Zn 6.421674481 5.197744323 22.686877592 0 0 0  
Zn 5.091013126 7.502516077 22.686877592 0 0 0  
Zn 3.760351771 9.807286233 22.686877592 0 0 0  
Zn 2.429690416 12.112056390 22.686877592 0 0 0  
Zn 11.744318305 0.588204010 22.686877592 0 0 0  
Zn 10.413656950 2.892974167 22.686877592 0 0 0  
Zn 9.082995595 5.197744323 22.686877592 0 0 0  
Zn 7.752334240 7.502516077 22.686877592 0 0 0  
Zn 6.421672885 9.807286233 22.686877592 0 0 0  
Zn 5.091011529 12.112056390 22.686877592 0 0 0  
Zn 14.405637822 0.588204010 22.686877592 0 0 0  
Zn 13.074978064 2.892974167 22.686877592 0 0 0  
Zn 11.744316709 5.197744323 22.686877592 0 0 0  
Zn 10.413655353 7.502516077 22.686877592 0 0 0  
Zn 9.082993998 9.807286233 22.686877592 0 0 0  
Zn 7.752332643 12.112056390 22.686877592 0 0 0  
Zn -0.243280381 1.358368098 25.623165008  
Zn -1.563122031 3.660783520 25.331089576  
Zn -2.881959763 5.973205241 25.313577000  
Zn -4.213204322 8.282265442 25.246430288  
Zn -5.539125956 10.598727978 25.319196773  
Zn -6.889773684 12.896886284 25.337711909  
Zn 2.430157050 1.363845558 25.617025558  
Zn 1.100669416 3.668676315 25.637646069  
Zn -0.236231964 5.955460648 25.265672214

Zn -1.556136279 8.285183008 25.261367834  
Zn -2.881915512 10.590193159 25.284930668  
Zn -4.234760237 12.894623208 25.320504247  
Zn 5.078718516 1.373424677 25.338842279  
Zn 3.748146907 3.661181731 25.381322241  
Zn 2.433792767 5.947936394 25.296712737  
Zn 1.094513788 8.260239399 25.310578106  
Zn -0.231183754 10.589184528 25.362827428  
Zn -1.579334873 12.899668423 25.371878019  
Zn 7.745730207 1.354539472 25.336742986  
Zn 6.408338078 3.641457833 25.391700959  
Zn 5.060532570 5.962105513 25.321254486  
Zn 3.747746565 8.287916265 25.267052861  
Zn 2.430506463 10.583429255 25.362912724  
Zn 1.092616956 12.888978601 25.395749970  
Zn 10.401191323 1.345994103 25.337394346  
Zn 9.069571689 3.642170263 25.313170203  
Zn 7.728366155 5.954957924 25.273941942  
Zn 6.402501047 8.284252194 25.277771490  
Zn 5.065950593 10.586936693 25.307728972  
Zn 3.763751976 12.890561505 25.450137831  
Zn 13.070589848 1.365567116 25.325991837  
Zn 11.734437508 3.633940518 25.342152328  
Zn 10.411550039 5.953173830 25.287368656  
Zn 9.071898010 8.283092477 25.265005899  
Zn 7.721271880 10.602081948 25.338704331  
Zn 6.423374430 12.893326408 25.308846078  
Zn 1.109350663 0.324806459 28.178232593  
Zn -0.441290147 3.066567250 28.095824346  
Zn -1.586283775 5.306544331 27.932668707  
Zn -2.912365706 7.540386638 27.875447468  
Zn -4.203630867 9.807511831 27.900573674  
Zn -5.483106252 12.062447395 27.965603145  
Zn 3.868313067 0.554270786 27.931200035  
Zn 2.663393396 3.112433207 28.331496468  
Zn 1.127116713 5.356730643 27.870628237  
Zn -0.243747039 7.587507731 27.931618299  
Zn -1.538008146 9.840350715 27.984710720  
Zn -2.834947403 12.097404471 28.018638672  
Zn 6.476820116 0.577494318 28.070632332  
Zn 5.159472300 2.899776863 28.055971418  
Zn 3.772193808 5.400241091 28.383466913  
Zn 2.423013889 7.616205942 27.804516253  
Zn 1.097514658 9.843700152 28.067609140  
Zn -0.215931912 12.112973011 28.126632799  
Zn 9.075318698 0.561747020 28.123181738  
Zn 7.760927180 2.901833414 28.009048984  
Zn 6.391938756 5.238644210 27.803789918  
Zn 5.081584066 7.556247539 27.762144851  
Zn 3.716473335 9.768668388 28.497807166  
Zn 2.398860665 12.078395425 28.208940376  
Zn 11.663931227 0.551673349 28.091033736  
Zn 10.379001388 2.891377118 28.007149638  
Zn 9.052041553 5.214414429 27.928651720  
Zn 7.745695621 7.508163066 27.944973756  
Zn 6.362847168 9.797444929 27.884276715  
Zn 4.987080970 12.032453622 28.030817611  
Zn 14.264028470 0.502169858 27.906370299  
Zn 12.992699490 2.860695565 28.012538821  
Zn 11.722414213 5.196766133 27.768921261  
Zn 10.388692672 7.506177541 27.842580584  
Zn 9.080505019 9.807382467 27.722178966  
Zn 7.663224038 12.061648351 27.978995698  
N 1.072923559 2.135655000 29.024422349  
O 1.021743056 2.142136730 30.491266349  
H 3.423864123 5.756812991 31.196158694

O 3.771545850 9.133806533 30.562733346  
H 3.961935255 8.169270584 30.639587598  
H 4.495076255 9.649523060 31.028628035  
O 5.636490219 10.815903526 31.503986031  
H 5.574722472 11.509932755 30.820281229  
H 6.547551289 10.446558485 31.395476604  
O 10.912230704 5.972904840 30.951815782  
O 8.361641823 6.872140196 31.693354640  
O 8.142481355 9.668962755 31.000023753  
O 6.387889715 5.190739395 31.156349607  
H 9.276771970 6.594608318 31.440547937  
H 11.366023083 6.575705160 30.327627225  
H 8.294673342 7.828246583 31.485472801  
H 7.137687578 5.841900480 31.342815334  
H 8.916667220 10.220157278 31.214021600  
H 8.127394087 9.641071756 30.010204979  
H 10.765948949 5.176167864 30.402446947  
H 6.696966139 4.636709874 30.413994014  
O 4.060181695 6.172632169 30.587913483  
H 4.985671189 5.803390198 30.844866229  
H 0.141987092 1.769326235 30.700963108  
End final coordinates

*NOH-Zn111-Nafion*

CELL\_PARAMETERS (angstrom)

15.967919350 0.000000000 0.000000000  
-7.983965199 13.828620613 0.000000000  
0.000000000 0.000000000 39.353633881

ATOMIC\_POSITIONS (angstrom)

Zn 1.099035447 0.588204010 22.686877592 0 0 0  
Zn -0.231625908 2.892974167 22.686877592 0 0 0  
Zn -1.562287263 5.197744323 22.686877592 0 0 0  
Zn -2.892948618 7.502516077 22.686877592 0 0 0  
Zn -4.223609973 9.807286233 22.686877592 0 0 0  
Zn -5.554269732 12.112056390 22.686877592 0 0 0  
Zn 3.760356561 0.588204010 22.686877592 0 0 0  
Zn 2.429695206 2.892974167 22.686877592 0 0 0  
Zn 1.099033851 5.197744323 22.686877592 0 0 0  
Zn -0.231627505 7.502516077 22.686877592 0 0 0  
Zn -1.562288860 9.807286233 22.686877592 0 0 0  
Zn -2.892950215 12.112056390 22.686877592 0 0 0  
Zn 6.421677675 0.588204010 22.686877592 0 0 0  
Zn 5.091016320 2.892974167 22.686877592 0 0 0  
Zn 3.760354964 5.197744323 22.686877592 0 0 0  
Zn 2.429693609 7.502516077 22.686877592 0 0 0  
Zn 1.099032254 9.807286233 22.686877592 0 0 0  
Zn -0.231629101 12.112056390 22.686877592 0 0 0  
Zn 9.082997192 0.588204010 22.686877592 0 0 0  
Zn 7.752335837 2.892974167 22.686877592 0 0 0  
Zn 6.421674481 5.197744323 22.686877592 0 0 0  
Zn 5.091013126 7.502516077 22.686877592 0 0 0  
Zn 3.760351771 9.807286233 22.686877592 0 0 0  
Zn 2.429690416 12.112056390 22.686877592 0 0 0  
Zn 11.744318305 0.588204010 22.686877592 0 0 0  
Zn 10.413656950 2.892974167 22.686877592 0 0 0  
Zn 9.082995595 5.197744323 22.686877592 0 0 0  
Zn 7.752334240 7.502516077 22.686877592 0 0 0  
Zn 6.421672885 9.807286233 22.686877592 0 0 0  
Zn 5.091011529 12.112056390 22.686877592 0 0 0  
Zn 14.405637822 0.588204010 22.686877592 0 0 0  
Zn 13.074978064 2.892974167 22.686877592 0 0 0  
Zn 11.744316709 5.197744323 22.686877592 0 0 0  
Zn 10.413655353 7.502516077 22.686877592 0 0 0  
Zn 9.082993998 9.807286233 22.686877592 0 0 0  
Zn 7.752332643 12.112056390 22.686877592 0 0 0

Zn -0.218874167 1.357628605 25.581926576  
Zn -1.556802498 3.668779040 25.320277445  
Zn -2.867500456 5.985977764 25.336295818  
Zn -4.194916940 8.286703537 25.314560906  
Zn -5.514928754 10.591696421 25.361598981  
Zn -6.868993343 12.891537764 25.345975110  
Zn 2.452851817 1.352531089 25.622231758  
Zn 1.117990867 3.669485128 25.582424638  
Zn -0.231656253 5.964725725 25.285640230  
Zn -1.551127498 8.294530398 25.314640839  
Zn -2.868970012 10.583983895 25.332888449  
Zn -4.218198500 12.880549202 25.332178083  
Zn 5.099062034 1.359352622 25.322762041  
Zn 3.768427344 3.657070635 25.326587991  
Zn 2.442032603 5.958130187 25.284868619  
Zn 1.101307193 8.265360729 25.342745511  
Zn -0.231149733 10.577411075 25.377169432  
Zn -1.567111536 12.882232670 25.414154810  
Zn 7.761825945 1.341190397 25.308304466  
Zn 6.432126121 3.637633086 25.343981388  
Zn 5.081131264 5.975197174 25.317524152  
Zn 3.754941844 8.280177691 25.267258931  
Zn 2.424395051 10.581110485 25.354791152  
Zn 1.100452272 12.879394109 25.395258049  
Zn 10.411166893 1.347514373 25.312067967  
Zn 9.090374173 3.645147505 25.305056599  
Zn 7.756822635 5.963145079 25.287660769  
Zn 6.419315984 8.279830702 25.269794407  
Zn 5.082563374 10.583068754 25.284027263  
Zn 3.773917390 12.894751376 25.364021826  
Zn 13.083236999 1.372537064 25.292178603  
Zn 11.747675859 3.644719708 25.348824121  
Zn 10.434490565 5.966220452 25.295717205  
Zn 9.101803638 8.285739758 25.293015988  
Zn 7.754181369 10.594823141 25.333854023  
Zn 6.442094917 12.890871092 25.305273661  
Zn 1.132910017 0.316277301 28.298455564  
Zn -0.422661535 3.036627118 28.007579547  
Zn -1.554206798 5.307747338 27.973737307  
Zn -2.866885240 7.546405415 27.953104637  
Zn -4.159044570 9.796280268 28.033679353  
Zn -5.454993805 12.057411944 28.012849754  
Zn 3.899577392 0.519949441 27.916040213  
Zn 2.701769218 3.032763380 28.232462355  
Zn 1.124008131 5.349123223 27.851777216  
Zn -0.212317556 7.609356430 27.918166705  
Zn -1.510866833 9.816491337 28.395682886  
Zn -2.797260903 12.065780655 28.099717175  
Zn 6.507008922 0.550812886 28.059415621  
Zn 5.201691197 2.869972388 27.976119810  
Zn 3.797179788 5.307490557 28.021776968  
Zn 2.451195489 7.589210240 27.946834793  
Zn 1.130268810 9.836215030 28.327615622  
Zn -0.187267354 12.086424421 28.187630836  
Zn 9.093688588 0.557470670 28.087886351  
Zn 7.793502488 2.890774540 27.977651307  
Zn 6.447751800 5.220024177 27.770027192  
Zn 5.117563647 7.539662207 27.914453875  
Zn 3.736534016 9.829397412 27.949519131  
Zn 2.420805673 12.101866653 28.149260187  
Zn 11.690927411 0.565779160 28.017702782  
Zn 10.403765927 2.893626312 27.965269570  
Zn 9.098337364 5.215415576 27.942388207  
Zn 7.783799153 7.503243742 27.93296452  
Zn 6.412422838 9.799180112 27.797668846  
Zn 5.046587510 12.095814368 27.914487490

Zn 14.316092666 0.537054267 27.872580483  
Zn 13.009437942 2.874049746 27.972669827  
Zn 11.762469430 5.213086025 27.783971410  
Zn 10.432912079 7.507035439 27.972592644  
Zn 9.135644648 9.798481776 27.776737843  
Zn 7.710218642 12.064715760 27.958533710  
N 1.083164096 2.175621677 29.016374676  
O 1.076551499 2.255082775 30.484315106  
H 3.526567952 5.676295847 31.562204367  
O -0.049352321 8.165283330 32.480122994  
S -0.117630495 9.261845275 31.530878481  
C -0.138823463 10.872679624 32.527636039  
C -1.455776217 11.169300801 33.315094949  
O -1.745793362 10.053917838 34.087234415  
C -2.643930828 10.137628328 35.142761977  
F -2.074180961 10.689156325 36.234761327  
F -3.747877349 10.856274511 34.834103934  
F -3.004804417 8.879053034 35.432651966  
F -1.271085865 12.286806913 34.077300427  
F -2.463482331 11.445343511 32.441463755  
F 0.059298323 11.910712909 31.662868563  
F 0.898727532 10.835728792 33.406126815  
O -1.332682273 9.348859272 30.691839853  
O 1.146990488 9.448912467 30.727072113  
O 3.452736650 8.667583756 31.682449302  
H 2.542374692 8.938408470 31.319584998  
H 3.718069278 7.678503341 31.399104730  
H 4.174756918 9.376250648 31.420869794  
O 5.163470588 10.449452455 31.106354212  
H 4.998608057 10.813529774 30.207939204  
H 6.117355012 10.171564699 31.095508788  
O 10.967453084 6.039532678 31.068878700  
O 8.481553265 7.014605873 31.848750156  
O 7.825791750 9.649817428 30.920513892  
O 6.463956942 5.460598659 31.195310987  
H 9.393840193 6.732292039 31.591001858  
H 11.786849766 6.565608620 31.060101420  
H 8.377888736 7.949367375 31.572326450  
H 7.245824515 6.057727011 31.441885382  
H 8.457155750 10.380894998 31.057911832  
H 7.880489566 9.471632390 29.946340035  
H 10.881876553 5.711546314 30.147120078  
H 6.724757851 5.013079365 30.368193173  
O 4.047165342 6.315637859 31.047469298  
H 5.033038920 6.014475266 31.119653829  
H 0.203474679 2.632127544 30.705615019

End final coordinates

## Supplementary references

1. Z. Y. Wu, M. Karamad, X. Yong, Q. Huang, D. A. Cullen, P. Zhu, C. Xia, Q. Xiao, M. Shakouri, F. Y. Chen, J. Y. Kim, Y. Xia, K. Heck, Y. Hu, M. S. Wong, Q. Li, I. Gates and S. Siahrostami, *Nat. Commun.*, 2021, **12**, 2870–2879.
2. G. F. Chen, Y. Yuan, H. Jiang, S. Y. Ren, L. X. Ding, L. Ma, T. Wu, J. Lu and H. Wang, *Nat. Energy.*, 2020, **5**, 605–613.
3. B. P. Chaplin, J. R. Shapley and C. J. Werth, *Catal. Lett.*, 2009, **130**, 56–62.
4. M. Machida, K. Sato, I. Ishibashi, M. A. Hasnat and K. Ikeue, *Chem. Commun.*, 2006, **7**, 732–734.
5. M. A. Hasnat, M. R. Karim and M. Machida, *Catal. Commun.*, 2009, **10**, 1975–1979.
6. P. Gayen, J. Spataro, S. Avasarala, A. M. Ali, J. M. Cerrato and B. P. Chaplin, *Environ. Sci. Technol.*, 2018, **52**, 9370–9379.
7. X. Deng, Y. Yang, L. Wang, X. Z. Fu and J. L. Luo, *Adv. Sci.*, 2021, **8**, 2004523–2004531.
8. C. Wang, Z. Liu, T. Hu, J. Li, L. Dong, F. Du, C. Li and C. Guo, *ChemSusChem.*, 2021, **14**, 1825–1829.
9. Y. Wang, A. Xu, Z. Wang, L. Huang, J. Li, F. Li, J. Wicks, M. Luo, D. H. Nam, C. S. Tan, Y. Ding, J. Wu, Y. Lum, C. T. Dinh, D. Sinton, G. Zheng and E. H. Sargent, *J. Am. Chem. Soc.*, 2020, **142**, 5702–5708.
10. Y. Yu, C. Wang, Y. Yu, Y. Wang and B. Zhang, *Sci. China Chem.*, 2020, **63**, 1469–1476.
11. Y. Wang, C. Liu, B. Zhang and Y. Yu, *Sci. China Mater.*, 2020, **63**, 2530–2538.
12. M. S. El-Deab, *Electrochimica Acta.*, 2004, **49**, 1639–1645.
13. L. Su, K. Li, H. Zhang, M. Fan, D. Ying, T. Sun, Y. Wang and J. Jia, *Water Res.* 2017, **120**, 1–11.

14. J. Y. Zhu, Q. Xue, Y. Y. Xue, Y. Ding, F. M. Li, P. Jin, P. Chen and Y. Chen, *ACS Appl. Mater. Interfaces*, 2020, **12**, 14064–14070.
